# Supplementary material for: Identification and validation of tumor microenvironment-related genes of prognostic value in lung adenocarcinoma
Source: PubMed Central journal article supplement — Oncol Lett. 2020 Jun 16;20(2):1772–80. doi: 10.3892/ol.2020.11735 (PMC7377199; doi:10.3892/ol.2020.11735), 2020-06-16

Figure SI. Continued. (A) Distribution of immune scores for lung adenocarcinoma cases with lymph node metastasis and non-lymph node metastasis. (B) Distribution of stromal scores for lung adenocarcinoma cases with lymph node metastasis and non-lymph node metastasis.

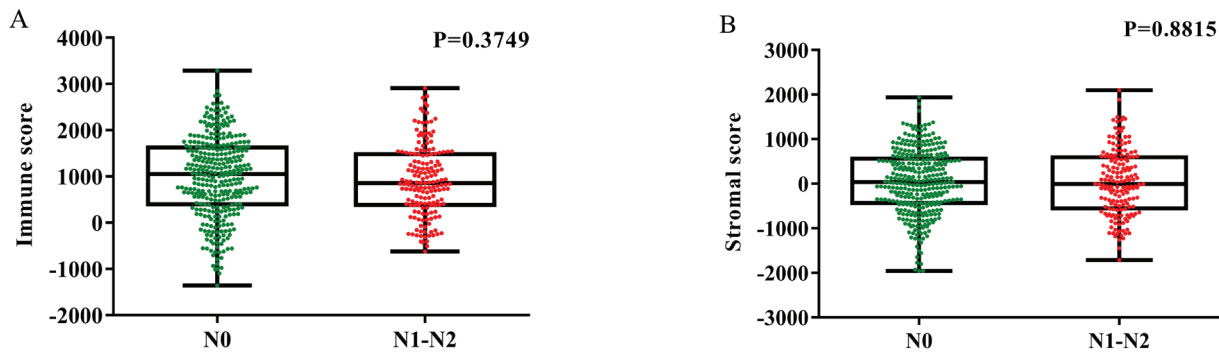

Supplement: Supplementary_Data1.pdf [file Supplementary_Data1.pdf]
