# Supplementary material for: Identification and validation of tumor microenvironment-related genes of prognostic value in lung adenocarcinoma
Source: PubMed Central journal article supplement — Oncol Lett. 2020 Jun 16;20(2):1772–80. doi: 10.3892/ol.2020.11735 (PMC7377199; doi:10.3892/ol.2020.11735), 2020-06-16
Supplement: Supplementary_Data2.pdf [file Supplementary_Data2.pdf]

Table SI. Intersection of downregulated and upregulated differentially expressed genes in high and low immune/stromal score groups.

| Gene     | Style          |
|----------|----------------|
| ICOS     | Down-regulated |
| IL7R     | Down-regulated |
| CD48     | Down-regulated |
| P2RY13   | Down-regulated |
| CCL17    | Down-regulated |
| HLA-DQA2 | Down-regulated |
| GPR174   | Down-regulated |
| SIT1     | Down-regulated |
| SCGB1A1  | Down-regulated |
| TIGIT    | Down-regulated |
| ZNF831   | Down-regulated |
| MRC1     | Down-regulated |
| SAMD3    | Down-regulated |
| CD2      | Down-regulated |
| APOC2    | Down-regulated |
| KIAA0748 | Down-regulated |
| TNFRSF9  | Down-regulated |
| EMR1     | Down-regulated |
| FCRLA    | Down-regulated |
| CD69     | Down-regulated |
| BTLA     | Down-regulated |
| PDCD1LG2 | Down-regulated |
| HLA-DOA  | Down-regulated |
| PLEK     | Down-regulated |
| CD84     | Down-regulated |
| IL12RB1  | Down-regulated |
| CCR4     | Down-regulated |
| CD3G     | Down-regulated |
| CD3E     | Down-regulated |
| TFEC     | Down-regulated |
| CXCR5    | Down-regulated |
| TLR10    | Down-regulated |
| LILRA4   | Down-regulated |
| CCL18    | Down-regulated |
| CD1B     | Down-regulated |
| STAP1    | Down-regulated |
| CCR2     | Down-regulated |
| CCL13    | Down-regulated |
| FCER2    | Down-regulated |
| EOMES    | Down-regulated |
| CD40LG   | Down-regulated |

---

|           |                |
|-----------|----------------|
| SLAMF1    | Down-regulated |
| IGSF6     | Down-regulated |
| C1QA      | Down-regulated |
| SIGLEC10  | Down-regulated |
| FCN1      | Down-regulated |
| CD5       | Down-regulated |
| PTPRO     | Down-regulated |
| DOCK2     | Down-regulated |
| S100B     | Down-regulated |
| CTLA4     | Down-regulated |
| ABCD2     | Down-regulated |
| CD80      | Down-regulated |
| PTPN22    | Down-regulated |
| ABI3BP    | Down-regulated |
| CTSE      | Down-regulated |
| P2RX7     | Down-regulated |
| TM7SF4    | Down-regulated |
| COL29A1   | Down-regulated |
| SASH3     | Down-regulated |
| TLR7      | Down-regulated |
| SLAMF8    | Down-regulated |
| FOLR2     | Down-regulated |
| CLEC4A    | Down-regulated |
| MS4A6A    | Down-regulated |
| CD37      | Down-regulated |
| LILRB1    | Down-regulated |
| TNFSF13B  | Down-regulated |
| HLA-DQB2  | Down-regulated |
| CD300LF   | Down-regulated |
| TMEM150B  | Down-regulated |
| PSTPIP1   | Down-regulated |
| CD53      | Down-regulated |
| HLA-DMB   | Down-regulated |
| RGS18     | Down-regulated |
| IKZF1     | Down-regulated |
| NCF1B     | Down-regulated |
| CD226     | Down-regulated |
| TNFRSF13B | Down-regulated |
| C1QC      | Down-regulated |
| CD22      | Down-regulated |
| LST1      | Down-regulated |
| ADH1B     | Down-regulated |
| GPR65     | Down-regulated |
| FUT7      | Down-regulated |

---

---

|           |                |
|-----------|----------------|
| FYB       | Down-regulated |
| C16orf54  | Down-regulated |
| SAA2      | Down-regulated |
| PIK3AP1   | Down-regulated |
| LCP1      | Down-regulated |
| NFAM1     | Down-regulated |
| IGJ       | Down-regulated |
| PLD4      | Down-regulated |
| IL10RA    | Down-regulated |
| GPR114    | Down-regulated |
| FPR3      | Down-regulated |
| SIGLEC9   | Down-regulated |
| FLT3      | Down-regulated |
| SIGLEC1   | Down-regulated |
| BIN2      | Down-regulated |
| C10orf128 | Down-regulated |
| LCP2      | Down-regulated |
| RASGRP2   | Down-regulated |
| FGD2      | Down-regulated |
| CMKLR1    | Down-regulated |
| COL6A6    | Down-regulated |
| LILRB5    | Down-regulated |
| GAPT      | Down-regulated |
| SLCO2B1   | Down-regulated |
| MS4A4A    | Down-regulated |
| NLRP3     | Down-regulated |
| STAC      | Down-regulated |
| MSR1      | Down-regulated |
| BCL2A1    | Down-regulated |
| SIGLEC7   | Down-regulated |
| IRF4      | Down-regulated |
| SIRPB1    | Down-regulated |
| CD1A      | Down-regulated |
| MPEG1     | Down-regulated |
| CD274     | Down-regulated |
| KLHL6     | Down-regulated |
| LAX1      | Down-regulated |
| ALOX5AP   | Down-regulated |
| MATK      | Down-regulated |
| FPR1      | Down-regulated |
| SIGLEC8   | Down-regulated |
| FOXP3     | Down-regulated |
| CD86      | Down-regulated |
| SLC1A3    | Down-regulated |

---

---

|          |                |
|----------|----------------|
| SIGLEC11 | Down-regulated |
| PRAM1    | Down-regulated |
| RCSD1    | Down-regulated |
| HHLA2    | Down-regulated |
| FCGR2C   | Down-regulated |
| KIAA0125 | Down-regulated |
| C1orf162 | Down-regulated |
| CADM3    | Down-regulated |
| CD209    | Down-regulated |
| TNFRSF17 | Down-regulated |
| GPR34    | Down-regulated |
| SIGLEC5  | Down-regulated |
| PIK3R6   | Down-regulated |
| 1-Mar    | Down-regulated |
| ANXA8L2  | Down-regulated |
| TIMD4    | Down-regulated |
| DPEP2    | Down-regulated |
| MMP7     | Down-regulated |
| LTF      | Down-regulated |
| CD180    | Down-regulated |
| FCRL5    | Down-regulated |
| CSF2RA   | Down-regulated |
| CLEC4D   | Down-regulated |
| TREM2    | Down-regulated |
| SUCNR1   | Down-regulated |
| FCRL2    | Down-regulated |
| PIK3R5   | Down-regulated |
| C13orf18 | Down-regulated |
| MS4A7    | Down-regulated |
| IL10     | Down-regulated |
| SIGLEC6  | Down-regulated |
| CPVL     | Down-regulated |
| C8orf80  | Down-regulated |
| CEACAM4  | Down-regulated |
| ARHGAP30 | Down-regulated |
| LRRC25   | Down-regulated |
| ALOX5    | Down-regulated |
| MYBPC2   | Down-regulated |
| NLRC4    | Down-regulated |
| CHRDL1   | Down-regulated |
| CLEC7A   | Down-regulated |
| LILRB3   | Down-regulated |
| CXorf21  | Down-regulated |
| CASS4    | Down-regulated |

---

---

|          |                |
|----------|----------------|
| RARRES1  | Down-regulated |
| KCNK13   | Down-regulated |
| TRPV2    | Down-regulated |
| HDC      | Down-regulated |
| MEOX1    | Down-regulated |
| ADAMTS8  | Down-regulated |
| GPNMB    | Down-regulated |
| CXCL14   | Down-regulated |
| PTGDR    | Down-regulated |
| MEI1     | Down-regulated |
| ADAM6    | Down-regulated |
| LSP1     | Down-regulated |
| CYSLTR2  | Down-regulated |
| ROS1     | Down-regulated |
| SIRPA    | Down-regulated |
| ITGA4    | Down-regulated |
| CCL21    | Down-regulated |
| C6orf97  | Down-regulated |
| PNOC     | Down-regulated |
| C12orf59 | Down-regulated |
| FAM23A   | Down-regulated |
| P2RY8    | Down-regulated |
| ATP8B4   | Down-regulated |
| HHIP     | Down-regulated |
| IL5RA    | Down-regulated |
| LILRA5   | Down-regulated |
| VCAM1    | Down-regulated |
| GLIPR1   | Down-regulated |
| IKZF3    | Down-regulated |
| P2RX1    | Down-regulated |
| AQP9     | Down-regulated |
| WDFY4    | Down-regulated |
| CLEC5A   | Down-regulated |
| CYSLTR1  | Down-regulated |
| KBTBD8   | Down-regulated |
| C1orf186 | Down-regulated |
| CILP     | Down-regulated |
| BHLHE41  | Down-regulated |
| ADORA3   | Down-regulated |
| PI16     | Down-regulated |
| IVL      | Down-regulated |
| WIPF1    | Down-regulated |
| FAM70A   | Down-regulated |
| DOCK11   | Down-regulated |

---

---

|          |                |
|----------|----------------|
| CST6     | Down-regulated |
| C5AR1    | Down-regulated |
| HS3ST3B1 | Down-regulated |
| KRT5     | Down-regulated |
| LOC84740 | Down-regulated |
| EGR2     | Down-regulated |
| MMP3     | Down-regulated |
| FMO1     | Down-regulated |
| NFATC2   | Down-regulated |
| FAM49A   | Down-regulated |
| CRYBB1   | Down-regulated |
| MT1M     | Down-regulated |
| TPSD1    | Down-regulated |
| RSPO1    | Down-regulated |
| DBC1     | Down-regulated |
| IL13RA2  | Down-regulated |
| OGN      | Down-regulated |
| DES      | Down-regulated |
| GPR68    | Down-regulated |
| ADAM19   | Down-regulated |
| CXCL6    | Down-regulated |
| FXYD1    | Down-regulated |
| PTGFR    | Down-regulated |
| TCF21    | Down-regulated |
| GAL3ST4  | Down-regulated |
| SCN2B    | Down-regulated |
| CPNE5    | Down-regulated |
| PLXDC2   | Down-regulated |
| GFRA1    | Down-regulated |
| SCN7A    | Down-regulated |
| SVEP1    | Down-regulated |
| CDH23    | Down-regulated |
| KCNMB1   | Down-regulated |
| DCN      | Down-regulated |
| ITGA8    | Down-regulated |
| TXLNB    | Down-regulated |
| MSC      | Down-regulated |
| EGR3     | Down-regulated |
| TMEM119  | Down-regulated |
| ANGPTL1  | Down-regulated |
| HGF      | Down-regulated |
| KLRB1    | Down-regulated |
| CCR5     | Down-regulated |
| CR1      | Down-regulated |

---

---

|          |                |
|----------|----------------|
| SELL     | Down-regulated |
| CCL23    | Down-regulated |
| SLAMF7   | Down-regulated |
| HAVCR2   | Down-regulated |
| CD163    | Down-regulated |
| DHRS9    | Down-regulated |
| PAX5     | Down-regulated |
| SPI1     | Down-regulated |
| CSF1R    | Down-regulated |
| C19orf59 | Down-regulated |
| PLXNC1   | Down-regulated |
| RGS13    | Down-regulated |
| SLC37A2  | Down-regulated |
| PLA2G4C  | Down-regulated |
| CCL14    | Down-regulated |
| CH25H    | Down-regulated |
| KCNE1    | Down-regulated |
| GDF5     | Down-regulated |
| FXYP4    | Up-regulated   |
| GLTPD2   | Up-regulated   |
| AGXT2L1  | Up-regulated   |
| AKR1C2   | Up-regulated   |
| GPX2     | Up-regulated   |
| PART1    | Up-regulated   |
| NPW      | Up-regulated   |
| NR0B1    | Up-regulated   |
| S100P    | Up-regulated   |
| C6orf176 | Up-regulated   |
| WDR72    | Up-regulated   |
| PAH      | Up-regulated   |
| INHA     | Up-regulated   |
| INSL4    | Up-regulated   |
| CPLX2    | Up-regulated   |
| AKR7A3   | Up-regulated   |
| FGA      | Up-regulated   |
| FGL1     | Up-regulated   |
| BARX1    | Up-regulated   |
| FGB      | Up-regulated   |

---

Table SII. Prognostic value of 20 upregulated differentially expressed genes.

| Gene name | HR[exp(coef)] | coef     | 95% CI lower | 95% CI upper | Z-score  | P-value  |
|-----------|---------------|----------|--------------|--------------|----------|----------|
| INSL4     | 1.085021      | 0.0816   | 0.039467     | 0.123733     | 3.79589  | 0.000147 |
| INHA      | 1.06374       | 0.061791 | 0.013928     | 0.109653     | 2.530309 | 0.011396 |
| C6orf176  | 1.051684      | 0.050392 | 0.008621     | 0.092163     | 2.364492 | 0.018055 |
| CPLX2     | 1.043541      | 0.04262  | 0.005493     | 0.079747     | 2.249931 | 0.024453 |
| FGA       | 1.03823       | 0.037517 | 0.001945     | 0.073089     | 2.067128 | 0.038722 |
| NR0B1     | 1.043368      | 0.042454 | 6.51E-04     | 0.084258     | 1.990488 | 0.046537 |
| FGB       | 1.026054      | 0.02572  | -0.00369     | 0.055133     | 1.713902 | 0.086547 |
| GPX2      | 1.033261      | 0.03272  | -0.00508     | 0.070515     | 1.696783 | 0.089738 |
| BARX1     | 1.033603      | 0.03305  | -0.00592     | 0.072025     | 1.662047 | 0.096503 |
| NPW       | 1.04006       | 0.039278 | -0.01829     | 0.096844     | 1.337311 | 0.181121 |
| S100P     | 0.843304      | -0.17043 | -0.49245     | 0.151593     | -1.0373  | 0.299596 |
| PART1     | 0.971223      | -0.0292  | -0.09206     | 0.033658     | -0.91046 | 0.362581 |
| AKR7A3    | 0.977195      | -0.02307 | -0.07837     | 0.032235     | -0.81756 | 0.413609 |
| WDR72     | 1.019621      | 0.019431 | -0.02842     | 0.067282     | 0.795898 | 0.426091 |
| AKR1C2    | 1.013347      | 0.013259 | -0.02401     | 0.050528     | 0.697271 | 0.485633 |
| PAH       | 1.014011      | 0.013913 | -0.0377      | 0.065529     | 0.528326 | 0.597273 |
| FGL1      | 0.995922      | -0.00409 | -0.04335     | 0.035176     | -0.204   | 0.838355 |
| AGXT2L1   | 1.004694      | 0.004683 | -0.05045     | 0.059815     | 0.166472 | 0.867786 |
| GLTPD2    | 1.003198      | 0.003193 | -0.05569     | 0.062076     | 0.106266 | 0.915371 |
| FXVD4     | 1.002114      | 0.002112 | -0.04891     | 0.053134     | 0.081141 | 0.93533  |

HR, hazard ratio; exp (coef),  $e^{\text{coef}}$ ; coef, coefficient.



Table SIII. Downregulated differentially expressed genes of prognostic value.

| Gene name | HR[exp(coef)] | coef     | 95% CI   |          | Z-score  | P-value   |
|-----------|---------------|----------|----------|----------|----------|-----------|
|           |               |          | lower    | upper    |          |           |
| IL16      | 0.779579726   | -0.249   | -0.38076 | -0.11724 | -3.70397 | 0.000212  |
| CD200R1   | 0.795816848   | -0.22839 | -0.34642 | -0.11036 | -3.79252 | 0.000149  |
| TRAF3IP3  | 0.797751554   | -0.22596 | -0.34946 | -0.10246 | -3.58591 | 0.000336  |
| CCR6      | 0.804500067   | -0.21753 | -0.33333 | -0.10174 | -3.68197 | 0.000231  |
| CXorf21   | 0.807299076   | -0.21406 | -0.33446 | -0.09366 | -3.48465 | 0.000493  |
| ARHGAP30  | 0.808531377   | -0.21254 | -0.35543 | -0.06965 | -2.91526 | 0.003554  |
| ACSM5     | 0.809813901   | -0.21095 | -0.31113 | -0.11077 | -4.12702 | 0.0000368 |
| P2RX1     | 0.8104498     | -0.21017 | -0.31889 | -0.10144 | -3.78852 | 0.000152  |
| KLRB1     | 0.812973844   | -0.20706 | -0.31455 | -0.09957 | -3.77545 | 0.000160  |
| P2RY8     | 0.815879724   | -0.20349 | -0.32535 | -0.08163 | -3.27278 | 0.001065  |
| ARHGEF6   | 0.819075696   | -0.19958 | -0.33708 | -0.06207 | -2.84476 | 0.004444  |
| LY9       | 0.819550905   | -0.199   | -0.31104 | -0.08696 | -3.48127 | 0.000499  |
| CLEC17A   | 0.819960391   | -0.1985  | -0.29625 | -0.10075 | -3.98008 | 0.0000689 |
| CD40LG    | 0.820899321   | -0.19735 | -0.29778 | -0.09693 | -3.85172 | 0.000117  |
| CD5       | 0.821668324   | -0.19642 | -0.30225 | -0.09058 | -3.63749 | 0.000275  |
| CCR2      | 0.822710416   | -0.19515 | -0.29811 | -0.09219 | -3.71479 | 0.000203  |
| KBTBD8    | 0.826021973   | -0.19113 | -0.31944 | -0.06283 | -2.91968 | 0.003504  |
| ACAP1     | 0.826396778   | -0.19068 | -0.30136 | -0.08    | -3.37654 | 0.000734  |
| ITGAL     | 0.82658123    | -0.19046 | -0.30861 | -0.0723  | -3.15933 | 0.001581  |
| SASH3     | 0.828356178   | -0.18831 | -0.31136 | -0.06527 | -2.9996  | 0.002703  |
| RCSD1     | 0.829953364   | -0.18639 | -0.32502 | -0.04775 | -2.63503 | 0.008413  |
| PTGDR     | 0.831187804   | -0.1849  | -0.32013 | -0.04967 | -2.6799  | 0.007364  |
| P2RY13    | 0.833042269   | -0.18267 | -0.28688 | -0.07847 | -3.43578 | 0.000591  |
| SLAMF1    | 0.833076788   | -0.18263 | -0.29112 | -0.07414 | -3.29927 | 0.000969  |
| RASGRP2   | 0.833763294   | -0.18181 | -0.28993 | -0.07368 | -3.29562 | 0.000982  |
| NLRC4     | 0.834892311   | -0.18045 | -0.31281 | -0.04809 | -2.67207 | 0.007538  |
| WDFY4     | 0.83565148    | -0.17954 | -0.27721 | -0.08188 | -3.60302 | 0.000315  |
| DPEP2     | 0.836173669   | -0.17892 | -0.28985 | -0.06799 | -3.16122 | 0.001571  |
| FGD2      | 0.836409019   | -0.17864 | -0.29733 | -0.05994 | -2.94981 | 0.00318   |
| STAP1     | 0.836531904   | -0.17849 | -0.26878 | -0.0882  | -3.87445 | 0.000107  |
| CD52      | 0.837005689   | -0.17792 | -0.2915  | -0.06435 | -3.07036 | 0.002138  |
| MEI1      | 0.837062686   | -0.17786 | -0.28611 | -0.0696  | -3.22006 | 0.001282  |
| SNX20     | 0.837460422   | -0.17738 | -0.29498 | -0.05978 | -2.95632 | 0.003113  |
| IKZF3     | 0.837776095   | -0.177   | -0.27619 | -0.07781 | -3.49754 | 0.00047   |
| AMICA1    | 0.837899017   | -0.17686 | -0.28913 | -0.06458 | -3.08739 | 0.002019  |
| CASS4     | 0.838417088   | -0.17624 | -0.28433 | -0.06815 | -3.19566 | 0.001395  |
| GIMAP8    | 0.838537549   | -0.1761  | -0.31771 | -0.03448 | -2.43722 | 0.014801  |
| PRKCB     | 0.838557631   | -0.17607 | -0.29261 | -0.05954 | -2.9613  | 0.003063  |
| HLA-DMB   | 0.840617389   | -0.17362 | -0.28177 | -0.06547 | -3.14633 | 0.001653  |
| BTK       | 0.841066989   | -0.17308 | -0.2797  | -0.06647 | -3.1819  | 0.001463  |
| SIGLECP3  | 0.841596835   | -0.17245 | -0.27088 | -0.07403 | -3.43423 | 0.000594  |

| Gene name | HR[exp(coef)] | coef     | 95% CI   |          | Z-score  | P-value  |
|-----------|---------------|----------|----------|----------|----------|----------|
|           |               |          | lower    | upper    |          |          |
| RASSF2    | 0.842029097   | -0.17194 | -0.30458 | -0.0393  | -2.54066 | 0.011064 |
| KLHL6     | 0.842492461   | -0.17139 | -0.2824  | -0.06038 | -3.02609 | 0.002477 |
| PTGDS     | 0.842695347   | -0.17115 | -0.26164 | -0.08066 | -3.70686 | 0.00021  |
| GIMAP6    | 0.843688412   | -0.16997 | -0.31263 | -0.02731 | -2.33516 | 0.019535 |
| DOCK8     | 0.844060588   | -0.16953 | -0.30558 | -0.03348 | -2.44226 | 0.014596 |
| HLA-DPB1  | 0.844112532   | -0.16947 | -0.26999 | -0.06895 | -3.30427 | 0.000952 |
| TLR10     | 0.844795209   | -0.16866 | -0.2605  | -0.07682 | -3.5995  | 0.000319 |
| ZNF831    | 0.845066181   | -0.16834 | -0.27077 | -0.06591 | -3.22111 | 0.001277 |
| TAGAP     | 0.845134133   | -0.16826 | -0.29101 | -0.04551 | -2.68654 | 0.00722  |
| CD226     | 0.845668348   | -0.16763 | -0.28583 | -0.04943 | -2.77951 | 0.005444 |
| GIMAP1    | 0.846242525   | -0.16695 | -0.30884 | -0.02506 | -2.30614 | 0.021103 |
| LRMP      | 0.846346251   | -0.16683 | -0.26994 | -0.06371 | -3.17104 | 0.001519 |
| SPN       | 0.846482687   | -0.16667 | -0.279   | -0.05433 | -2.9078  | 0.00364  |
| CD2       | 0.846986379   | -0.16607 | -0.28235 | -0.04979 | -2.79919 | 0.005123 |
| CLECL1    | 0.847465023   | -0.16551 | -0.27004 | -0.06097 | -3.10313 | 0.001915 |
| ARHGAP15  | 0.847788128   | -0.16512 | -0.28323 | -0.04702 | -2.74022 | 0.00614  |
| CD37      | 0.848748034   | -0.16399 | -0.28071 | -0.04727 | -2.75381 | 0.005891 |
| ITGA4     | 0.84974645    | -0.16282 | -0.29738 | -0.02826 | -2.37154 | 0.017714 |
| CYTIP     | 0.850325582   | -0.16214 | -0.28703 | -0.03724 | -2.54445 | 0.010945 |
| PTPRC     | 0.850620091   | -0.16179 | -0.27297 | -0.05061 | -2.8522  | 0.004342 |
| IRF8      | 0.850790204   | -0.16159 | -0.27717 | -0.04601 | -2.74022 | 0.00614  |
| BTLA      | 0.851211943   | -0.16109 | -0.27011 | -0.05208 | -2.89637 | 0.003775 |
| ANKRD44   | 0.85315879    | -0.15881 | -0.26975 | -0.04787 | -2.80572 | 0.00502  |
| LILRA1    | 0.853208153   | -0.15875 | -0.279   | -0.0385  | -2.58745 | 0.009669 |
| IL10RA    | 0.853309055   | -0.15863 | -0.2862  | -0.03107 | -2.43728 | 0.014798 |
| PYHIN1    | 0.853805717   | -0.15805 | -0.26339 | -0.05272 | -2.94083 | 0.003273 |
| SIGLEC11  | 0.854116463   | -0.15769 | -0.25976 | -0.05562 | -3.0279  | 0.002463 |
| CYSLTR2   | 0.85470361    | -0.157   | -0.2758  | -0.0382  | -2.5902  | 0.009592 |
| C16orf54  | 0.855010464   | -0.15664 | -0.26924 | -0.04405 | -2.72669 | 0.006397 |
| C13orf18  | 0.855349503   | -0.15625 | -0.26872 | -0.04377 | -2.72259 | 0.006477 |
| CD79B     | 0.855872628   | -0.15563 | -0.25228 | -0.05899 | -3.15618 | 0.001599 |
| SAMD3     | 0.856699522   | -0.15467 | -0.26991 | -0.03942 | -2.63043 | 0.008528 |
| SIGLEC6   | 0.85673312    | -0.15463 | -0.24574 | -0.06352 | -3.3265  | 0.000879 |
| BIN2      | 0.856741587   | -0.15462 | -0.28357 | -0.02567 | -2.35015 | 0.018766 |
| HLA-DRA   | 0.856817969   | -0.15453 | -0.25515 | -0.05391 | -3.00997 | 0.002613 |
| PSTPIP1   | 0.857555413   | -0.15367 | -0.2732  | -0.03414 | -2.51972 | 0.011745 |
| FAM49A    | 0.85869396    | -0.15234 | -0.27659 | -0.0281  | -2.40323 | 0.016251 |
| CD69      | 0.858855087   | -0.15216 | -0.25615 | -0.04816 | -2.86763 | 0.004136 |
| EVI2B     | 0.859005076   | -0.15198 | -0.27501 | -0.02895 | -2.42114 | 0.015472 |
| FAM23A    | 0.859025714   | -0.15196 | -0.25706 | -0.04685 | -2.8337  | 0.004601 |
| GPR65     | 0.859584155   | -0.15131 | -0.27538 | -0.02723 | -2.3901  | 0.016844 |
| GAPT      | 0.859851272   | -0.151   | -0.25419 | -0.0478  | -2.8679  | 0.004132 |

| Gene name    | HR[exp(coef)] | coef     | 95% CI   |          | Z-score  | P-value  |
|--------------|---------------|----------|----------|----------|----------|----------|
|              |               |          | lower    | upper    |          |          |
| ITK          | 0.860056067   | -0.15076 | -0.2546  | -0.04692 | -2.84554 | 0.004434 |
| CEACAM21     | 0.860436773   | -0.15032 | -0.25514 | -0.04549 | -2.81058 | 0.004945 |
| PIK3CG       | 0.861070173   | -0.14958 | -0.25249 | -0.04667 | -2.8488  | 0.004389 |
| CSF2RB       | 0.861257128   | -0.14936 | -0.26359 | -0.03514 | -2.56291 | 0.01038  |
| GVIN1        | 0.862116763   | -0.14836 | -0.25936 | -0.03737 | -2.61977 | 0.008799 |
| IKZF1        | 0.862182283   | -0.14829 | -0.26977 | -0.0268  | -2.39241 | 0.016738 |
| CYTH4        | 0.862198318   | -0.14827 | -0.27839 | -0.01815 | -2.23339 | 0.025523 |
| CCR7         | 0.862833202   | -0.14753 | -0.2489  | -0.04617 | -2.85263 | 0.004336 |
| FCRL1        | 0.863137639   | -0.14718 | -0.22757 | -0.0668  | -3.58855 | 0.000333 |
| LOC100233209 | 0.863159326   | -0.14716 | -0.25757 | -0.03675 | -2.61228 | 0.008994 |
| LILRA4       | 0.863565371   | -0.14669 | -0.23906 | -0.05431 | -3.11232 | 0.001856 |
| MPEG1        | 0.86360501    | -0.14664 | -0.26441 | -0.02887 | -2.44047 | 0.014668 |
| TNFAIP8L2    | 0.86427532    | -0.14586 | -0.26506 | -0.02667 | -2.39843 | 0.016466 |
| FMO2         | 0.864961426   | -0.14507 | -0.23906 | -0.05108 | -3.02514 | 0.002485 |
| MS4A7        | 0.865143885   | -0.14486 | -0.25983 | -0.02989 | -2.4696  | 0.013526 |
| SIT1         | 0.865219753   | -0.14477 | -0.25036 | -0.03918 | -2.68734 | 0.007202 |
| WAS          | 0.865231091   | -0.14476 | -0.27283 | -0.01668 | -2.21527 | 0.026742 |
| HPGDS        | 0.865233638   | -0.14476 | -0.22646 | -0.06305 | -3.47238 | 0.000516 |
| CD28         | 0.865441366   | -0.14452 | -0.25773 | -0.0313  | -2.50186 | 0.012354 |
| ST8SIA1      | 0.86563054    | -0.1443  | -0.25245 | -0.03614 | -2.61486 | 0.008926 |
| SCN2B        | 0.865852851   | -0.14404 | -0.23273 | -0.05535 | -3.18316 | 0.001457 |
| TLR7         | 0.865917603   | -0.14397 | -0.24954 | -0.03839 | -2.67274 | 0.007523 |
| CD4          | 0.865918933   | -0.14396 | -0.27082 | -0.0171  | -2.22423 | 0.026133 |
| ATP8B4       | 0.865930009   | -0.14395 | -0.26891 | -0.019   | -2.25794 | 0.02395  |
| HLA-DPA1     | 0.866339117   | -0.14348 | -0.24369 | -0.04326 | -2.80612 | 0.005014 |
| RGS13        | 0.866365345   | -0.14345 | -0.23821 | -0.04869 | -2.96703 | 0.003007 |
| CD300LF      | 0.866682634   | -0.14308 | -0.24558 | -0.04059 | -2.73612 | 0.006217 |
| CLEC7A       | 0.866960283   | -0.14276 | -0.24791 | -0.03761 | -2.66109 | 0.007789 |
| C10orf128    | 0.867398121   | -0.14226 | -0.24793 | -0.03658 | -2.63849 | 0.008328 |
| IRF4         | 0.867996027   | -0.14157 | -0.23523 | -0.04791 | -2.96242 | 0.003052 |
| CD27         | 0.868504919   | -0.14098 | -0.24182 | -0.04014 | -2.74019 | 0.00614  |
| GPR174       | 0.868698042   | -0.14076 | -0.2462  | -0.03532 | -2.61648 | 0.008884 |
| RSPO1        | 0.868949006   | -0.14047 | -0.23678 | -0.04416 | -2.85876 | 0.004253 |
| C8orf80      | 0.869154876   | -0.14023 | -0.23505 | -0.04542 | -2.89894 | 0.003744 |
| CLEC10A      | 0.869222765   | -0.14016 | -0.22846 | -0.05185 | -3.11077 | 0.001866 |
| TNFRSF13B    | 0.86929283    | -0.14008 | -0.22449 | -0.05566 | -3.25214 | 0.001145 |
| KIAA0748     | 0.869414419   | -0.13994 | -0.2407  | -0.03918 | -2.722   | 0.006489 |
| LSP1         | 0.869617303   | -0.1397  | -0.27062 | -0.00878 | -2.09142 | 0.036491 |
| MFAP4        | 0.869887584   | -0.13939 | -0.22798 | -0.0508  | -3.08393 | 0.002043 |
| SLA          | 0.870526197   | -0.13866 | -0.26314 | -0.01418 | -2.18319 | 0.029022 |
| HLA-DOA      | 0.870944067   | -0.13818 | -0.23401 | -0.04235 | -2.82605 | 0.004713 |
| HLA-DRB1     | 0.871058377   | -0.13805 | -0.2294  | -0.0467  | -2.96188 | 0.003058 |

| Gene name | HR[exp(coef)] | coef     | 95% CI   |          | Z-score  | P-value  |
|-----------|---------------|----------|----------|----------|----------|----------|
|           |               |          | lower    | upper    |          |          |
| EGR2      | 0.871112637   | -0.13798 | -0.25465 | -0.02131 | -2.31804 | 0.020447 |
| CCR4      | 0.871168933   | -0.13792 | -0.22595 | -0.04989 | -3.07061 | 0.002136 |
| C1orf186  | 0.872112057   | -0.13684 | -0.23055 | -0.04313 | -2.86205 | 0.004209 |
| DNAJC5B   | 0.873295021   | -0.13548 | -0.23188 | -0.03908 | -2.75453 | 0.005878 |
| CD53      | 0.873409969   | -0.13535 | -0.2582  | -0.0125  | -2.15935 | 0.030823 |
| GPR114    | 0.873413129   | -0.13535 | -0.23857 | -0.03212 | -2.56988 | 0.010173 |
| HLA-DQA1  | 0.873548634   | -0.13519 | -0.22043 | -0.04996 | -3.10872 | 0.001879 |
| LCP2      | 0.873753687   | -0.13496 | -0.26848 | -0.00143 | -1.98101 | 0.047591 |
| ABCD2     | 0.873990211   | -0.13469 | -0.24523 | -0.02414 | -2.38804 | 0.016938 |
| PPP1R16B  | 0.874487899   | -0.13412 | -0.25039 | -0.01784 | -2.26075 | 0.023775 |
| GGTA1     | 0.874562338   | -0.13403 | -0.252   | -0.01607 | -2.22689 | 0.025955 |
| LAX1      | 0.874881179   | -0.13367 | -0.22871 | -0.03863 | -2.75651 | 0.005842 |
| CD48      | 0.875086521   | -0.13343 | -0.24304 | -0.02382 | -2.38596 | 0.017035 |
| CD1C      | 0.875296636   | -0.13319 | -0.20852 | -0.05787 | -3.46562 | 0.000529 |
| TCF21     | 0.875507768   | -0.13295 | -0.21994 | -0.04596 | -2.99547 | 0.00274  |
| CTLA4     | 0.87600553    | -0.13238 | -0.23512 | -0.02965 | -2.52553 | 0.011552 |
| C5orf20   | 0.877173799   | -0.13105 | -0.22275 | -0.03935 | -2.80093 | 0.005095 |
| FLT3      | 0.877453625   | -0.13073 | -0.23458 | -0.02688 | -2.46729 | 0.013614 |
| DOCK2     | 0.877775313   | -0.13036 | -0.24336 | -0.01737 | -2.26128 | 0.023742 |
| CLEC4A    | 0.877874111   | -0.13025 | -0.24329 | -0.01721 | -2.2584  | 0.023921 |
| COL29A1   | 0.878232928   | -0.12984 | -0.20719 | -0.0525  | -3.29036 | 0.001001 |
| TREM2     | 0.878984592   | -0.12899 | -0.23453 | -0.02344 | -2.39534 | 0.016605 |
| CX3CR1    | 0.879067664   | -0.12889 | -0.21449 | -0.0433  | -2.95145 | 0.003163 |
| LCP1      | 0.879126383   | -0.12883 | -0.24825 | -0.0094  | -2.11424 | 0.034495 |
| PRAM1     | 0.879172604   | -0.12877 | -0.23339 | -0.02416 | -2.41268 | 0.015836 |
| LST1      | 0.879520009   | -0.12838 | -0.23881 | -0.01795 | -2.27855 | 0.022694 |
| THEMIS    | 0.879676778   | -0.1282  | -0.23302 | -0.02338 | -2.39714 | 0.016523 |
| HDC       | 0.879731548   | -0.12814 | -0.2136  | -0.04267 | -2.93862 | 0.003297 |
| CD79A     | 0.879839844   | -0.12802 | -0.20624 | -0.04979 | -3.20733 | 0.00134  |
| FCRL3     | 0.879962173   | -0.12788 | -0.20927 | -0.04649 | -3.07945 | 0.002074 |
| AMPD1     | 0.880009564   | -0.12782 | -0.21038 | -0.04526 | -3.03452 | 0.002409 |
| C7orf58   | 0.880043486   | -0.12778 | -0.23079 | -0.02478 | -2.43146 | 0.015038 |
| RASGRP4   | 0.88008723    | -0.12773 | -0.24452 | -0.01095 | -2.14378 | 0.032051 |
| KIAA0125  | 0.880231259   | -0.12757 | -0.20321 | -0.05193 | -3.30571 | 0.000947 |
| IGJ       | 0.88046948    | -0.1273  | -0.20417 | -0.05043 | -3.24589 | 0.001171 |
| SH2D1A    | 0.880605731   | -0.12715 | -0.23178 | -0.02252 | -2.38173 | 0.017232 |
| TMEM119   | 0.88085731    | -0.12686 | -0.24136 | -0.01236 | -2.17157 | 0.029888 |
| P2RY10    | 0.880888915   | -0.12682 | -0.23144 | -0.0222  | -2.37596 | 0.017504 |
| LY86      | 0.880897585   | -0.12681 | -0.23483 | -0.01879 | -2.30096 | 0.021394 |
| CD3E      | 0.880930696   | -0.12678 | -0.24218 | -0.01137 | -2.15303 | 0.031317 |
| TXLNB     | 0.881108237   | -0.12657 | -0.2346  | -0.01855 | -2.29661 | 0.021641 |
| SCN7A     | 0.883107398   | -0.12431 | -0.19554 | -0.05308 | -3.42058 | 0.000625 |

| Gene name | HR[exp(coef)] | coef     | 95% CI   |           | Z-score  | P-value  |
|-----------|---------------|----------|----------|-----------|----------|----------|
|           |               |          | lower    | upper     |          |          |
| CRTAM     | 0.883287977   | -0.1241  | -0.232   | -0.01621  | -2.25441 | 0.02417  |
| RTN1      | 0.883384586   | -0.12399 | -0.22015 | -0.02784  | -2.52741 | 0.011491 |
| CD1B      | 0.883561372   | -0.12379 | -0.2009  | -0.04669  | -3.14681 | 0.001651 |
| IL12RB1   | 0.883674438   | -0.12367 | -0.24036 | -0.00697  | -2.07705 | 0.037797 |
| SLAMF6    | 0.884004197   | -0.12329 | -0.2335  | -0.01308  | -2.19265 | 0.028332 |
| CH25H     | 0.884115424   | -0.12317 | -0.2029  | -0.04344  | -3.02786 | 0.002463 |
| DOK2      | 0.884248233   | -0.12302 | -0.24039 | -0.00564  | -2.05415 | 0.039961 |
| EVI2A     | 0.884381849   | -0.12287 | -0.24249 | -0.00324  | -2.01312 | 0.044102 |
| CD80      | 0.884628134   | -0.12259 | -0.22935 | -0.01583  | -2.25051 | 0.024417 |
| ABI3BP    | 0.884720584   | -0.12248 | -0.21124 | -0.03372  | -2.7046  | 0.006839 |
| CCR5      | 0.884755734   | -0.12244 | -0.24417 | -0.000715 | -1.97147 | 0.04867  |
| TIFAB     | 0.884805865   | -0.12239 | -0.21886 | -0.02591  | -2.48631 | 0.012907 |
| CYSLTR1   | 0.884809914   | -0.12238 | -0.22813 | -0.01664  | -2.26836 | 0.023308 |
| HGF       | 0.884903947   | -0.12228 | -0.21574 | -0.02881  | -2.56407 | 0.010345 |
| LILRB1    | 0.885160483   | -0.12199 | -0.23545 | -0.00852  | -2.1071  | 0.035109 |
| ABCA6     | 0.885218827   | -0.12192 | -0.21965 | -0.02419  | -2.44512 | 0.01448  |
| CXCR5     | 0.885451903   | -0.12166 | -0.20767 | -0.03565  | -2.77226 | 0.005567 |
| BLK       | 0.885478633   | -0.12163 | -0.19421 | -0.04905  | -3.28448 | 0.001022 |
| SPIB      | 0.885754252   | -0.12132 | -0.20332 | -0.03931  | -2.89953 | 0.003737 |
| CD22      | 0.886007818   | -0.12103 | -0.20831 | -0.03375  | -2.71772 | 0.006573 |
| MNDA      | 0.886113106   | -0.12091 | -0.22119 | -0.02063  | -2.36311 | 0.018122 |
| FCRLA     | 0.886310572   | -0.12069 | -0.19431 | -0.04707  | -3.21292 | 0.001314 |
| PLEK      | 0.886319866   | -0.12068 | -0.23324 | -0.00812  | -2.10127 | 0.035617 |
| CD3G      | 0.886987044   | -0.11992 | -0.22195 | -0.0179   | -2.30389 | 0.021229 |
| CD33      | 0.887048578   | -0.11986 | -0.22735 | -0.01236  | -2.18528 | 0.028869 |
| P2RY12    | 0.887720491   | -0.1191  | -0.20528 | -0.03292  | -2.70855 | 0.006758 |
| CPNE5     | 0.887835774   | -0.11897 | -0.22252 | -0.01542  | -2.25186 | 0.024331 |
| NCF1B     | 0.8880288     | -0.11875 | -0.21975 | -0.01776  | -2.30455 | 0.021192 |
| DCN       | 0.888086325   | -0.11869 | -0.22972 | -0.00765  | -2.09502 | 0.036169 |
| MS4A2     | 0.888290968   | -0.11846 | -0.19502 | -0.04189  | -3.03219 | 0.002428 |
| IGSF6     | 0.888414473   | -0.11832 | -0.22559 | -0.01104  | -2.16171 | 0.03064  |
| MS4A1     | 0.888779933   | -0.11791 | -0.17968 | -0.05613  | -3.7409  | 0.000183 |
| KCNMA1    | 0.888977022   | -0.11768 | -0.21843 | -0.01693  | -2.2894  | 0.022056 |
| PAX5      | 0.889422423   | -0.11718 | -0.19369 | -0.04068  | -3.00218 | 0.002681 |
| IL5RA     | 0.889498893   | -0.1171  | -0.2045  | -0.0297   | -2.62587 | 0.008643 |
| NCKAP1L   | 0.889613108   | -0.11697 | -0.22586 | -0.00807  | -2.1053  | 0.035265 |
| HLA-DRB5  | 0.889839309   | -0.11671 | -0.19318 | -0.04025  | -2.99162 | 0.002775 |
| CNR2      | 0.889982426   | -0.11655 | -0.20908 | -0.02402  | -2.46882 | 0.013556 |
| PLD4      | 0.890167475   | -0.11635 | -0.2005  | -0.03219  | -2.70955 | 0.006737 |
| FCRL2     | 0.890313587   | -0.11618 | -0.19227 | -0.04009  | -2.99255 | 0.002767 |
| CD1E      | 0.890335147   | -0.11616 | -0.18635 | -0.04596  | -3.24335 | 0.001181 |
| NLRP3     | 0.890443894   | -0.11604 | -0.22969 | -0.00238  | -2.00108 | 0.045384 |

| Gene name | HR[exp(coef)] | coef     | 95% CI   |          | Z-score  | P-value  |
|-----------|---------------|----------|----------|----------|----------|----------|
|           |               |          | lower    | upper    |          |          |
| TNFSF8    | 0.89051291    | -0.11596 | -0.22236 | -0.00956 | -2.136   | 0.032679 |
| COL6A6    | 0.890898269   | -0.11553 | -0.1885  | -0.04255 | -3.10286 | 0.001917 |
| CD19      | 0.891388886   | -0.11497 | -0.18236 | -0.04759 | -3.34411 | 0.000825 |
| HLA-DQB1  | 0.891785297   | -0.11453 | -0.19643 | -0.03263 | -2.74086 | 0.006128 |
| GZMK      | 0.892083063   | -0.1142  | -0.20626 | -0.02214 | -2.43124 | 0.015047 |
| PPP2R2B   | 0.892255465   | -0.114   | -0.22596 | -0.00205 | -1.99585 | 0.045951 |
| FXYD1     | 0.892320786   | -0.11393 | -0.19305 | -0.0348  | -2.8221  | 0.004771 |
| CTSG      | 0.892969731   | -0.1132  | -0.18712 | -0.03928 | -3.00155 | 0.002686 |
| ICOS      | 0.893081762   | -0.11308 | -0.21704 | -0.00911 | -2.13171 | 0.03303  |
| ALOX5AP   | 0.894102131   | -0.11194 | -0.21368 | -0.0102  | -2.15637 | 0.031055 |
| TRAT1     | 0.894109187   | -0.11193 | -0.20816 | -0.0157  | -2.27965 | 0.022628 |
| FCER2     | 0.895719962   | -0.11013 | -0.18649 | -0.03377 | -2.82667 | 0.004703 |
| GPR34     | 0.895771954   | -0.11007 | -0.21682 | -0.00332 | -2.02094 | 0.043286 |
| CDH23     | 0.89612293    | -0.10968 | -0.20847 | -0.01089 | -2.17594 | 0.02956  |
| CHRD1     | 0.896518924   | -0.10924 | -0.17575 | -0.04272 | -3.21862 | 0.001288 |
| CLEC12A   | 0.896534183   | -0.10922 | -0.19624 | -0.0222  | -2.45994 | 0.013896 |
| FUT7      | 0.896893584   | -0.10882 | -0.21569 | -0.00195 | -1.9957  | 0.045967 |
| ADAMTS8   | 0.897671628   | -0.10795 | -0.17887 | -0.03703 | -2.98347 | 0.00285  |
| HLA-DQB2  | 0.897813045   | -0.10779 | -0.17429 | -0.04129 | -3.17707 | 0.001488 |
| KCNA3     | 0.898548272   | -0.10697 | -0.19133 | -0.02262 | -2.48554 | 0.012935 |
| POU2AF1   | 0.899103846   | -0.10636 | -0.18472 | -0.02799 | -2.66007 | 0.007813 |
| C17orf87  | 0.899737189   | -0.10565 | -0.20341 | -0.0079  | -2.11833 | 0.034147 |
| FOLR2     | 0.899988183   | -0.10537 | -0.19969 | -0.01106 | -2.18982 | 0.028537 |
| IL7R      | 0.900405279   | -0.10491 | -0.19015 | -0.01967 | -2.41214 | 0.015859 |
| EOMES     | 0.901111286   | -0.10413 | -0.20473 | -0.00352 | -2.02857 | 0.042502 |
| PTPRO     | 0.902163361   | -0.10296 | -0.20289 | -0.00303 | -2.01936 | 0.043449 |
| CR1       | 0.902334045   | -0.10277 | -0.19257 | -0.01297 | -2.24307 | 0.024893 |
| TPSAB1    | 0.902947747   | -0.10209 | -0.17902 | -0.02516 | -2.60098 | 0.009296 |
| CD84      | 0.9030751     | -0.10195 | -0.19611 | -0.00779 | -2.12212 | 0.033827 |
| TNFRSF17  | 0.903325985   | -0.10167 | -0.17766 | -0.02569 | -2.62247 | 0.008729 |
| P2RX7     | 0.903440176   | -0.10155 | -0.19768 | -0.00541 | -2.07035 | 0.038419 |
| COLEC12   | 0.90621754    | -0.09848 | -0.19232 | -0.00463 | -2.05665 | 0.03972  |
| SIGLEC8   | 0.906840097   | -0.09779 | -0.18911 | -0.00646 | -2.09871 | 0.035843 |
| CPA3      | 0.906883281   | -0.09774 | -0.16591 | -0.02957 | -2.8101  | 0.004953 |
| FCN1      | 0.907477345   | -0.09709 | -0.18246 | -0.01171 | -2.2288  | 0.025827 |
| CCL13     | 0.907986754   | -0.09653 | -0.17215 | -0.0209  | -2.50163 | 0.012362 |
| CCL14     | 0.908300739   | -0.09618 | -0.17343 | -0.01893 | -2.44022 | 0.014678 |
| FLJ40330  | 0.908713494   | -0.09573 | -0.16868 | -0.02277 | -2.57185 | 0.010116 |
| CHIT1     | 0.908975154   | -0.09544 | -0.15512 | -0.03576 | -3.13428 | 0.001723 |
| PNOC      | 0.910240657   | -0.09405 | -0.18193 | -0.00616 | -2.09729 | 0.035968 |
| ADAM6     | 0.911582524   | -0.09257 | -0.17006 | -0.01508 | -2.34151 | 0.019206 |
| MRC1      | 0.91234718    | -0.09173 | -0.17067 | -0.0128  | -2.27783 | 0.022737 |

| Gene name | HR[exp(coef)] | coef     | 95% CI   |          | Z-score  | P-value  |
|-----------|---------------|----------|----------|----------|----------|----------|
|           |               |          | lower    | upper    |          |          |
| GFRA1     | 0.912720998   | -0.09133 | -0.16179 | -0.02086 | -2.54006 | 0.011083 |
| TM7SF4    | 0.912745358   | -0.0913  | -0.17788 | -0.00472 | -2.06674 | 0.038758 |
| CCL17     | 0.913925775   | -0.09001 | -0.15855 | -0.02146 | -2.57361 | 0.010064 |
| HLA-DQA2  | 0.91408494    | -0.08983 | -0.16713 | -0.01253 | -2.2778  | 0.022738 |
| MAP1LC3C  | 0.914963051   | -0.08887 | -0.16812 | -0.00963 | -2.1981  | 0.027942 |
| FAM92B    | 0.915381652   | -0.08841 | -0.1574  | -0.01943 | -2.51201 | 0.012005 |
| APOC2     | 0.916072909   | -0.08766 | -0.16539 | -0.00993 | -2.21036 | 0.02708  |
| TPSB2     | 0.916398401   | -0.0873  | -0.16275 | -0.01186 | -2.26813 | 0.023321 |
| FCRL5     | 0.917705976   | -0.08588 | -0.1602  | -0.01155 | -2.26458 | 0.023539 |
| OGN       | 0.918639622   | -0.08486 | -0.15265 | -0.01707 | -2.4535  | 0.014147 |
| FCER1A    | 0.918752941   | -0.08474 | -0.14795 | -0.02152 | -2.62724 | 0.008608 |
| CADM3     | 0.919379754   | -0.08406 | -0.16414 | -0.00397 | -2.05712 | 0.039675 |
| S100B     | 0.920804983   | -0.08251 | -0.15878 | -0.00623 | -2.12004 | 0.034003 |
| C4orf7    | 0.921150559   | -0.08213 | -0.13577 | -0.02849 | -3.00088 | 0.002692 |
| GDF5      | 0.922196978   | -0.081   | -0.16098 | -0.00102 | -1.98488 | 0.047158 |
| LOC96610  | 0.924448814   | -0.07856 | -0.15582 | -0.00129 | -1.99269 | 0.046295 |
| C7        | 0.924970914   | -0.07799 | -0.13804 | -0.01795 | -2.54579 | 0.010903 |
| ITGA8     | 0.927246202   | -0.07554 | -0.14349 | -0.00758 | -2.17865 | 0.029358 |
| ADH1B     | 0.927748364   | -0.07499 | -0.12416 | -0.02583 | -2.98984 | 0.002791 |
| CCL19     | 0.930547934   | -0.07198 | -0.13945 | -0.00452 | -2.09122 | 0.036508 |
| ROS1      | 0.930892057   | -0.07161 | -0.12862 | -0.0146  | -2.4619  | 0.01382  |
| DARC      | 0.931847889   | -0.07059 | -0.13762 | -0.00355 | -2.06378 | 0.039039 |
| C19orf59  | 0.933599311   | -0.06871 | -0.13308 | -0.00434 | -2.09203 | 0.036436 |
| CD1A      | 0.934530812   | -0.06771 | -0.12409 | -0.01133 | -2.35384 | 0.018581 |
| C13orf30  | 0.941904083   | -0.05985 | -0.1156  | -0.0041  | -2.10418 | 0.035363 |
| DMBT1     | 0.948831408   | -0.05252 | -0.09262 | -0.01243 | -2.5678  | 0.010235 |
| SFTPC     | 0.956151016   | -0.04484 | -0.07545 | -0.01422 | -2.87055 | 0.004098 |
| SCGB1A1   | 0.962680622   | -0.03803 | -0.07292 | -0.00314 | -2.13651 | 0.032638 |
| L1CAM     | 0.978751996   | 0.066492 | 0.000543 | 0.132441 | 1.976091 | 0.048144 |
| ASAM      | 0.989216356   | 0.103654 | 0.012346 | 0.194962 | 2.224972 | 0.026083 |

HR, hazard ratio; exp (coef), e<sup>coef</sup>; coef, coefficient.

Table SIV. Prognostic value of genes from two independent lung adenocarcinoma cohorts of the Gene Expression Omnibus database.

**GSE37745**

| Gene name     | HR[exp(coef)] | P-value   |
|---------------|---------------|-----------|
| CR2           | 0.03435476    | 0.009568  |
| LOC152586     | 0.077151328   | 0.013377  |
| LOC101928052  | 0.085078926   | 0.018085  |
| ELL2P3        | 0.090533817   | 0.000736  |
| CEP112        | 0.097652266   | 0.002605  |
| DGKG          | 0.098889371   | 0.002442  |
| C11orf58      | 0.105327577   | 0.020642  |
| RP11-502N13.2 | 0.106085325   | 0.006477  |
| RDH10         | 0.111446896   | 0.028205  |
| GTF2A1L       | 0.115776143   | 0.019119  |
| MTHFS         | 0.117142697   | 0.011763  |
| MAP3K11       | 0.122237573   | 0.000388  |
| DUOX1         | 0.124114327   | 0.002006  |
| MIR4315-1     | 0.124479847   | 0.000155  |
| LOC440792     | 0.125252212   | 0.000518  |
| RUFY2         | 0.127726873   | 0.025689  |
| LRRC7         | 0.12861598    | 0.032755  |
| ZSCAN30       | 0.129011665   | 0.000753  |
| GCSAM         | 0.134420007   | 0.000315  |
| RP11-375I20.6 | 0.135042901   | 0.000206  |
| LOC100507477  | 0.135159358   | 0.031976  |
| MEG9          | 0.138268203   | 0.00403   |
| HDAC11        | 0.140122848   | 0.001125  |
| IRX2          | 0.141678057   | 0.0000742 |
| LOC100505534  | 0.143561061   | 0.036917  |



|                        |             |          |
|------------------------|-------------|----------|
| CTNNA1                 | 0.146439581 | 0.001148 |
| GABRR3                 | 0.147165411 | 0.018583 |
| NTRK2                  | 0.147814664 | 0.016431 |
| SLCO1C1                | 0.150033307 | 0.010856 |
| CCDC28B                | 0.151343358 | 0.00989  |
| RIOK3                  | 0.151984339 | 0.026837 |
| BC039319               | 0.152535408 | 0.020653 |
| PCDHB1                 | 0.154671543 | 0.002788 |
| LOC286009              | 0.156887211 | 0.001647 |
| C9orf37                | 0.158737068 | 0.001151 |
| IGHG1                  | 0.160634903 | 0.007516 |
| BX648501               | 0.161743545 | 0.017497 |
| AP001062.7 /// C21orf2 | 0.163819806 | 0.005217 |
| ANKRD44-IT1            | 0.164815282 | 0.020641 |
| PAQR9                  | 0.165029519 | 0.010596 |
| SLC34A3                | 0.16672517  | 0.012037 |
| OR1E1                  | 0.167832714 | 0.035606 |
| KLHL14                 | 0.171927097 | 0.010663 |
| TPM4                   | 0.172244812 | 0.005709 |
| TMEM170A               | 0.172340854 | 0.011344 |
| SCAMP5                 | 0.173164233 | 0.016372 |
| WNT6                   | 0.173666042 | 0.003972 |
| ARNTL2-AS1             | 0.177396231 | 0.042364 |
| P2RX1                  | 0.177740547 | 0.000402 |
| LOC101927346           | 0.178196942 | 0.013714 |
| SLIT3                  | 0.179588498 | 0.017855 |
| BC040734               | 0.18532332  | 0.04863  |
| ZNF29P                 | 0.186635197 | 0.033108 |
| C15orf32               | 0.18694068  | 0.004318 |

|               |             |          |
|---------------|-------------|----------|
| LOC100505622  | 0.188369147 | 0.0065   |
| LOC101929734  | 0.189126558 | 0.005384 |
| CLEC4GP1      | 0.19026389  | 0.005455 |
| CNTN2         | 0.190645544 | 0.006156 |
| TOR4A         | 0.191020758 | 0.004949 |
| CLEC12B       | 0.191108197 | 0.026729 |
| LOC101927059  | 0.191997893 | 0.034719 |
| LOC286068     | 0.194086118 | 0.042612 |
| LOC101929694  | 0.195639936 | 0.023931 |
| PRX           | 0.195719926 | 0.001627 |
| ST7-AS2       | 0.196822159 | 0.027881 |
| PAPLN         | 0.197870268 | 0.001596 |
| LOC100127974  | 0.198907558 | 0.029458 |
| LDHAL6B       | 0.199196891 | 0.01349  |
| ESPNL         | 0.201426859 | 0.000775 |
| MEF2C-AS1     | 0.202352262 | 0.016749 |
| TCEANC        | 0.203368961 | 0.028827 |
| KRTAP5-2      | 0.203671685 | 0.009395 |
| BC042091      | 0.204491825 | 0.036071 |
| SPG7          | 0.205095854 | 0.033695 |
| LOC283454     | 0.205591372 | 0.022165 |
| LOC102724938  | 0.207384188 | 0.031209 |
| IL21R-AS1     | 0.208346526 | 0.015076 |
| LOC100507140  | 0.208806989 | 0.049975 |
| KIAA1671      | 0.212830614 | 0.002675 |
| SYNJ2         | 0.213224378 | 0.01945  |
| LOC100507530  | 0.213513286 | 0.033828 |
| RP11-552F3.10 | 0.216425725 | 0.011556 |
| ZNF71         | 0.217362302 | 0.01649  |

|                       |             |          |
|-----------------------|-------------|----------|
| FOXK1                 | 0.2176196   | 0.019135 |
| P2RX2                 | 0.219615215 | 0.002318 |
| TSPY1                 | 0.220426069 | 0.020572 |
| LOC100507494          | 0.223513308 | 0.005407 |
| MYPN                  | 0.223679744 | 0.014587 |
| FAN1                  | 0.223707948 | 0.043427 |
| OPRM1                 | 0.224268587 | 0.014796 |
| HIST1H4F /// HIST1H4G | 0.2244564   | 0.049123 |
| EPO                   | 0.224560499 | 0.002655 |
| NDST2                 | 0.224993285 | 0.001277 |
| METTL15               | 0.225604638 | 0.02651  |
| RBMV3AP               | 0.226494924 | 0.045075 |
| APOH                  | 0.226567516 | 0.020499 |
| TMEM196               | 0.226996787 | 0.01589  |
| AC012531.25           | 0.226999043 | 0.013701 |
| GRAPL                 | 0.227264782 | 0.013465 |
| SPEF2                 | 0.227825109 | 0.014653 |
| DEAF1                 | 0.228780529 | 0.025046 |
| MRI1                  | 0.230478184 | 0.023873 |
| ASXL2                 | 0.23328732  | 0.014372 |
| FAM167A               | 0.233681056 | 0.039194 |
| TSPAN32               | 0.233898559 | 0.002733 |
| RABGAP1L              | 0.233938942 | 0.038537 |
| LOC102724842          | 0.234691674 | 0.002243 |
| AC007362.3            | 0.23492055  | 0.015342 |
| ICOSLG                | 0.235309296 | 0.006637 |
| TMEM175               | 0.235800796 | 0.001039 |
| TRIQQ                 | 0.236730682 | 0.027926 |
| LOC728099             | 0.237442108 | 0.016576 |

|                             |             |             |
|-----------------------------|-------------|-------------|
| FKSG29                      | 0.238604504 | 0.049147    |
| C1orf95                     | 0.238715199 | 0.006091    |
| KCND3                       | 0.239321108 | 0.010533    |
| ASB10                       | 0.239611221 | 0.007992    |
| ANKRD19P                    | 0.242134106 | 0.00832     |
| EML5                        | 0.244770722 | 0.03769     |
| PTPN7                       | 0.246904905 | 0.004302    |
| SAYSD1                      | 0.248067164 | 0.03325     |
| LOC101929511                | 0.248160884 | 0.032289    |
| TFAP2A                      | 0.2486795   | 0.03281     |
| MYCNOS                      | 0.249064377 | 0.037678    |
| SYNE3                       | 0.249211154 | 0.011104    |
| CTB-12O2.1                  | 0.249534717 | 0.04008     |
| PLD4                        | 0.251198568 | 0.011674    |
| FRMD8                       | 0.252348814 | 0.042908    |
| GH2                         | 0.253114475 | 0.023055    |
| SSR4                        | 0.25331592  | 0.000000077 |
| LOC219690                   | 0.253708447 | 0.019116    |
| DUSP26                      | 0.255123492 | 0.003105    |
| SIRT3                       | 0.256148105 | 0.015694    |
| BET1L                       | 0.257744428 | 0.001324    |
| RP11-218C14.8               | 0.258986114 | 0.006367    |
| DBH-AS1                     | 0.261674935 | 0.005976    |
| SAMD14                      | 0.263692277 | 0.016478    |
| TAZ                         | 0.263966233 | 0.000637    |
| TAZ                         | 0.26455465  | 0.003555    |
| PNMAL2                      | 0.266587235 | 0.035886    |
| ARHGEF15                    | 0.267410992 | 0.047052    |
| BC034456 /// RP11-229P13.25 | 0.267577692 | 0.015171    |

|                       |             |           |
|-----------------------|-------------|-----------|
| PROCA1                | 0.268792314 | 0.01609   |
| LOC100130456          | 0.269453251 | 0.01902   |
| HOXB3                 | 0.269748791 | 0.012485  |
| DSG1                  | 0.269856306 | 0.030211  |
| RNF141                | 0.269919811 | 0.008611  |
| FKBP8                 | 0.270095163 | 0.026262  |
| AAK1                  | 0.270566606 | 0.022634  |
| TRIM78P               | 0.270967301 | 0.003608  |
| MIR7515 /// MIR7515HG | 0.271972061 | 0.02127   |
| MIR4800 /// MXD4      | 0.271997498 | 0.001388  |
| BC127192 /// SHANK2   | 0.272824604 | 0.035829  |
| HSPA1L                | 0.272917144 | 0.001615  |
| TRBV7-3 /// TRBV7-3   | 0.272970462 | 0.004237  |
| DCLK2                 | 0.273290928 | 0.035631  |
| TSPO2                 | 0.27432328  | 0.007689  |
| FAM230B               | 0.274812766 | 0.006776  |
| RP11-338N10.1         | 0.275347208 | 0.008493  |
| WBSCR16               | 0.275884655 | 0.008922  |
| LOC100652768          | 0.276662074 | 0.010893  |
| CIRBP-AS1             | 0.277061945 | 0.037139  |
| IFNA1                 | 0.277514309 | 0.03704   |
| LBX1                  | 0.27791774  | 0.002163  |
| ERLEC1                | 0.278572318 | 0.0000144 |
| CTIF                  | 0.279587965 | 0.040838  |
| SLC25A53              | 0.279872983 | 0.043893  |
| LOC100130872          | 0.280985143 | 0.019305  |
| TIPARP-AS1            | 0.281130903 | 0.035066  |
| GPD1                  | 0.282054883 | 0.015172  |
| TRIO                  | 0.282411174 | 0.021505  |

|                                    |             |          |
|------------------------------------|-------------|----------|
| TSPAN32                            | 0.282965839 | 0.003728 |
| NODAL                              | 0.283179747 | 0.041795 |
| PWWP2B                             | 0.283292507 | 0.019455 |
| PAOX                               | 0.284667981 | 0.01243  |
| ZRANB2-AS1                         | 0.284783546 | 0.008153 |
| HIST1H2BN                          | 0.28513392  | 0.005978 |
| LOC100996425                       | 0.285407561 | 0.029467 |
| IQSEC1                             | 0.285589538 | 0.000967 |
| EIF1B-AS1                          | 0.285681556 | 0.010652 |
| MAPK4                              | 0.286594453 | 0.013294 |
| FAM78B                             | 0.287072563 | 0.017624 |
| FAM13A-AS1                         | 0.288345215 | 0.003507 |
| LINC00944                          | 0.288439066 | 0.001162 |
| LINC00226                          | 0.288578537 | 0.045254 |
| GJA3                               | 0.289006442 | 0.014321 |
| HIPK4                              | 0.289658917 | 0.030919 |
| PROM2                              | 0.28986038  | 0.023955 |
| SH2D3C                             | 0.290599974 | 0.040982 |
| PHF1                               | 0.290623332 | 0.002591 |
| EHD3                               | 0.290919849 | 0.037037 |
| BC089413 /// IGLVI-70 /// IGLVI-70 | 0.291427443 | 0.005886 |
| LINC00165                          | 0.292680595 | 0.005765 |
| RPL10 /// SNORA70                  | 0.293204997 | 0.022846 |
| NXPH3                              | 0.295923064 | 0.01857  |
| TRPM3                              | 0.29641872  | 0.015476 |
| CA7                                | 0.29681416  | 0.015645 |
| DUS3L                              | 0.298649067 | 0.027433 |
| PYROXD2                            | 0.298702181 | 0.004352 |
| TAOK3                              | 0.299731247 | 0.00584  |

|                         |             |          |
|-------------------------|-------------|----------|
| MBD3L1                  | 0.300077815 | 0.026377 |
| ZNF555                  | 0.300132231 | 0.04321  |
| SNX20                   | 0.300249471 | 0.003658 |
| EPN2 /// EPN2-IT1       | 0.300484984 | 0.001977 |
| LDB3                    | 0.300776747 | 0.049228 |
| GHRL                    | 0.301334392 | 0.031519 |
| LOC101929373 /// SLC9B1 | 0.301883949 | 0.046129 |
| SEMA4D                  | 0.302121618 | 0.001945 |
| ARHGEF40                | 0.302598782 | 0.017024 |
| LENG1                   | 0.304146607 | 0.013345 |
| LOC101929655            | 0.304616818 | 0.023179 |
| ESR1                    | 0.305747148 | 0.047115 |
| LINC00528               | 0.306260333 | 0.011441 |
| C15orf57                | 0.30629227  | 0.029623 |
| SLC4A5                  | 0.308524269 | 0.035115 |
| HTR5A                   | 0.308903231 | 0.013811 |
| TSPYL2                  | 0.30910388  | 0.006687 |
| HS6ST1                  | 0.30991483  | 0.009937 |
| RP11-84D1.2             | 0.311361642 | 0.009711 |
| AKAP12                  | 0.31194166  | 0.010424 |
| SCML4                   | 0.312176645 | 0.00327  |
| TPP1                    | 0.314308811 | 0.008    |
| PRCP                    | 0.314313509 | 0.019941 |
| TNFRSF9                 | 0.314349766 | 0.011651 |
| NAAA                    | 0.314917037 | 0.00125  |
| ZNRF1                   | 0.315487715 | 0.049831 |
| IGH                     | 0.316384346 | 0.004485 |
| MAPKAPK2                | 0.316697584 | 0.003505 |
| RP1-286D6.5             | 0.316902468 | 0.018235 |

|                   |             |           |
|-------------------|-------------|-----------|
| TCF25             | 0.317645471 | 0.011591  |
| ANKRD24           | 0.318574545 | 0.036596  |
| KCNN3             | 0.31916211  | 0.025477  |
| RAMP2-AS1         | 0.319243301 | 0.047961  |
| MIB2              | 0.319502215 | 0.010204  |
| INTS6-AS1         | 0.31969593  | 0.016681  |
| TSR3              | 0.31986192  | 0.032671  |
| DCLK2             | 0.320039861 | 0.005472  |
| AMER1             | 0.320646489 | 0.013872  |
| TRIM36            | 0.321764317 | 0.010045  |
| CRTC3             | 0.321857528 | 0.005253  |
| RAB30             | 0.322162345 | 0.0000343 |
| SHC3              | 0.322717047 | 0.028384  |
| TMEM106A          | 0.323049071 | 0.021088  |
| LINC00957         | 0.323512375 | 0.027521  |
| CCDC136           | 0.324265826 | 0.040352  |
| NCOR2             | 0.324748442 | 0.028484  |
| RGS6              | 0.324832706 | 0.020138  |
| DSTNP1 /// DSTNP1 | 0.324871532 | 0.041401  |
| LRTM1             | 0.324944695 | 0.011381  |
| ZNF557            | 0.325083845 | 0.036564  |
| ITPRIPL1          | 0.326273515 | 0.022881  |
| RNF113A           | 0.326936851 | 0.002763  |
| LOC389641         | 0.32793874  | 0.008061  |
| DGCR7             | 0.328232951 | 0.047328  |
| LDLRAD4           | 0.328314155 | 0.004052  |
| FUT7              | 0.329560593 | 0.002666  |
| LINC00582         | 0.330154564 | 0.002581  |
| SCAND2P           | 0.330224566 | 0.025238  |



|                            |             |          |
|----------------------------|-------------|----------|
| BC047651                   | 0.330671613 | 0.047918 |
| EFNB3                      | 0.330891058 | 0.02596  |
| ERICH1 /// FLJ00290        | 0.331103685 | 0.013552 |
| CUBN                       | 0.331919405 | 0.013796 |
| C3orf70                    | 0.33273944  | 0.002525 |
| NOP14-AS1                  | 0.332949207 | 0.020394 |
| ZNF688                     | 0.333209813 | 0.002734 |
| CHID1                      | 0.333385433 | 0.00056  |
| AMER2                      | 0.334120819 | 0.031389 |
| MYH7                       | 0.334330394 | 0.045395 |
| LOC101928221               | 0.334924155 | 0.045927 |
| LINC01184 /// LOC101929964 | 0.335342384 | 0.01524  |
| MSANTD1                    | 0.335804998 | 0.004756 |
| CCR4                       | 0.335865491 | 0.04441  |
| CALML6                     | 0.336055673 | 0.034756 |
| ST3GAL2                    | 0.336863831 | 0.007688 |
| PRPF40B                    | 0.337580834 | 0.001837 |
| TF                         | 0.337927673 | 0.025648 |
| AHSP                       | 0.33883804  | 0.023067 |
| CD40LG                     | 0.339034637 | 0.015607 |
| LOC284112                  | 0.339668962 | 0.002341 |
| KIR3DX1                    | 0.341536551 | 0.027401 |
| CPA5                       | 0.341950449 | 0.015272 |
| P2RX4                      | 0.34245559  | 0.000131 |
| GSN                        | 0.344328372 | 0.036169 |
| LOC730961                  | 0.344547192 | 0.030064 |
| MTMR1                      | 0.345238501 | 0.017733 |
| RP11-805I24.3              | 0.347703623 | 0.048347 |
| TRAFD1                     | 0.347827373 | 0.002852 |

|                         |             |          |
|-------------------------|-------------|----------|
| TMEM132A                | 0.34892447  | 0.024294 |
| PLK3                    | 0.349586463 | 0.040532 |
| CDYL2                   | 0.349716229 | 0.046754 |
| EPG5                    | 0.350265574 | 0.035407 |
| GMDS-AS1 /// RP1-80B9.2 | 0.350583679 | 0.016542 |
| HAX1                    | 0.3512517   | 0.018842 |
| GIT2                    | 0.351392509 | 0.004496 |
| LINC00312               | 0.351579465 | 0.015257 |
| KMT2A                   | 0.351629969 | 0.046697 |
| HYDIN                   | 0.352792212 | 0.046475 |
| SLC9A5                  | 0.353018784 | 0.016739 |
| NAGLU                   | 0.353039745 | 0.001159 |
| LZTS1                   | 0.35311057  | 0.020438 |
| RALGPS1                 | 0.353269608 | 0.045233 |
| CREBBP                  | 0.353794392 | 0.049338 |
| C21orf67                | 0.353842445 | 0.04432  |
| FUNDC2                  | 0.353992917 | 0.00103  |
| PLEKHH3                 | 0.354734865 | 0.015904 |
| WAS                     | 0.355756581 | 0.017073 |
| NME8                    | 0.356962624 | 0.021533 |
| BMPER                   | 0.35797985  | 0.006612 |
| IL12A-AS1               | 0.358043624 | 0.0465   |
| RCE1                    | 0.358819737 | 0.016231 |
| BFSP2                   | 0.358848282 | 0.02018  |
| ZNF333                  | 0.359151399 | 0.008492 |
| INHBC                   | 0.360000855 | 0.046875 |
| SFXN5                   | 0.362188894 | 0.033135 |
| IKBKG                   | 0.363057533 | 0.014264 |
| GNG7                    | 0.364300059 | 0.000118 |

|                        |             |           |
|------------------------|-------------|-----------|
| ANKRD1                 | 0.364375636 | 0.038151  |
| CALR3                  | 0.364781942 | 0.045325  |
| TMEM50B                | 0.365004195 | 0.033047  |
| AKNA                   | 0.36518431  | 0.000453  |
| PDCD4-AS1              | 0.36549274  | 0.005869  |
| NCR1                   | 0.366561761 | 0.043944  |
| FKBP2                  | 0.366855843 | 0.000511  |
| CFLAR /// LOC102724614 | 0.367254432 | 0.012728  |
| MIR6751 /// SYVN1      | 0.367806376 | 0.005296  |
| TTL5                   | 0.370078071 | 0.00835   |
| LOC100130502           | 0.370433251 | 0.009008  |
| GLP1R                  | 0.370953703 | 0.029422  |
| FAM129C                | 0.370985772 | 0.009901  |
| PRR22                  | 0.371416009 | 0.040296  |
| S1PR2                  | 0.372008406 | 0.01128   |
| ST6GALNAC6             | 0.372029169 | 0.005383  |
| SRP19 /// ZRSR1        | 0.372040874 | 0.003197  |
| ICAM3                  | 0.372759141 | 0.0000072 |
| TFE3                   | 0.373093574 | 0.002773  |
| PLEKHM1                | 0.373270515 | 0.00517   |
| TRAFD1                 | 0.37363642  | 0.00437   |
| LCNL1                  | 0.373916854 | 0.039487  |
| NAALADL1               | 0.374229799 | 0.030219  |
| LINC00957              | 0.374262117 | 0.007772  |
| BIVM                   | 0.374664502 | 0.018964  |
| POU2F2                 | 0.375139352 | 0.012838  |
| ENTHD2                 | 0.375713429 | 0.016292  |
| HSH2D                  | 0.37606687  | 0.000233  |
| SLC5A2                 | 0.376084219 | 0.037408  |

|                          |             |          |
|--------------------------|-------------|----------|
| DNAJC18                  | 0.37655904  | 0.015326 |
| ARHGEF12                 | 0.376845199 | 0.048759 |
| LLGL1                    | 0.37687834  | 0.003913 |
| SEC24C                   | 0.377120511 | 0.003584 |
| RUSC2                    | 0.377470127 | 0.0363   |
| OR52K3P                  | 0.378516099 | 0.040299 |
| AC007228.11 /// BX647249 | 0.378833817 | 0.037039 |
| LURAP1                   | 0.37906551  | 0.047256 |
| DCAF8                    | 0.379204578 | 0.006373 |
| ANKRD20A11P              | 0.37954305  | 0.005675 |
| AP001462.6               | 0.380302386 | 0.005611 |
| SWSAP1                   | 0.38047847  | 0.00808  |
| SFXN5                    | 0.380546256 | 0.043322 |
| OGFOD2                   | 0.381099971 | 0.037889 |
| SCYL1                    | 0.381550923 | 0.043874 |
| WDFY2                    | 0.381995894 | 0.047971 |
| CNTNAP1                  | 0.382643493 | 0.019758 |
| CHPF2                    | 0.383105599 | 0.006865 |
| C12orf76                 | 0.383803224 | 0.043851 |
| SMARCB1                  | 0.384042672 | 0.010412 |
| SLC34A1                  | 0.38529712  | 0.045748 |
| ATP6V1E2 /// FLJ41757    | 0.385393397 | 0.008934 |
| CLNK                     | 0.386038052 | 0.016504 |
| PLBD2                    | 0.386925607 | 0.012168 |
| SIT1                     | 0.387618502 | 0.002349 |
| ERC1                     | 0.387657445 | 0.01493  |
| MECP2                    | 0.389204259 | 0.000762 |
| FCRL1                    | 0.389289398 | 0.046875 |
| MRPL41                   | 0.389428673 | 0.036367 |

|                           |             |           |
|---------------------------|-------------|-----------|
| CXCR5                     | 0.389648118 | 0.024475  |
| USP19                     | 0.390029615 | 0.023869  |
| ASB1                      | 0.390543163 | 0.017631  |
| CNTROB                    | 0.391595348 | 0.040376  |
| TRAPPC9                   | 0.391751763 | 0.023605  |
| FAM89B                    | 0.392822243 | 0.003015  |
| CNR1                      | 0.393248471 | 0.00977   |
| SYDE1                     | 0.393806735 | 0.041757  |
| C11orf21                  | 0.394663941 | 0.000978  |
| RP11-498C9.17             | 0.394915082 | 0.048698  |
| EHD3                      | 0.395109102 | 0.00982   |
| TBX5                      | 0.395216113 | 0.049152  |
| KCNQ1OT1 /// LOC101927338 | 0.396477181 | 0.048475  |
| RP11-332H18.4             | 0.397218956 | 0.036411  |
| NKAPP1                    | 0.397761045 | 0.014299  |
| C21orf58                  | 0.397997968 | 0.046996  |
| TEC                       | 0.398441348 | 0.025564  |
| RP11-28F1.2               | 0.39858269  | 0.007139  |
| ZNF219                    | 0.399140795 | 0.021089  |
| NUDT14                    | 0.399202705 | 0.029531  |
| ZNF506                    | 0.399562668 | 0.001367  |
| PPP1R12C                  | 0.399571984 | 0.032591  |
| N4BP2L1                   | 0.399981648 | 0.004007  |
| RP11-115A15.2             | 0.400115989 | 0.025701  |
| FLJ11292                  | 0.400455701 | 0.011885  |
| TXNDC15                   | 0.4028089   | 0.0000517 |
| LCN10                     | 0.403434878 | 0.036153  |
| PCED1B-AS1                | 0.403486813 | 0.033703  |
| PRKD2                     | 0.403684056 | 0.011228  |

|                      |             |           |
|----------------------|-------------|-----------|
| SLC6A13              | 0.40373066  | 0.0304    |
| MEI1                 | 0.40401977  | 0.001345  |
| CNGB1                | 0.404186455 | 0.017612  |
| C17orf70             | 0.404198577 | 0.020385  |
| POU6F1               | 0.40422086  | 0.01138   |
| TMCC2                | 0.405063201 | 0.027127  |
| MAPKAPK5-AS1         | 0.405384613 | 0.048808  |
| ISCU                 | 0.406131274 | 0.014671  |
| BCAS4                | 0.406242142 | 0.00747   |
| C19orf83             | 0.406413692 | 0.021073  |
| KIAA0125             | 0.406468251 | 0.000197  |
| ZBP1                 | 0.406909942 | 0.002017  |
| TLE6                 | 0.406963048 | 0.038118  |
| NUP210               | 0.407234104 | 0.011078  |
| MIR142               | 0.407601599 | 0.001484  |
| MIR6748 /// TMEM179B | 0.407610888 | 0.016878  |
| POU2F2               | 0.40800181  | 0.021464  |
| MAST3                | 0.408683533 | 0.047182  |
| LTBP3                | 0.409938675 | 0.006677  |
| RNASEH2C             | 0.409978168 | 0.039155  |
| DERL3                | 0.410193785 | 0.0000586 |
| TRAFD1               | 0.41071372  | 0.005953  |
| FFAR1                | 0.411164565 | 0.035756  |
| PAOX                 | 0.411194613 | 0.014448  |
| ARHGEF2              | 0.411885771 | 0.0014    |
| RP11-464F9.20        | 0.412022021 | 0.019967  |
| IKZF3                | 0.412164667 | 0.005405  |
| SLAMF1               | 0.412963158 | 0.022234  |
| DNLZ                 | 0.413528557 | 0.000814  |

|                        |             |          |
|------------------------|-------------|----------|
| ATP10A                 | 0.413687428 | 0.042585 |
| FBXW7                  | 0.413787326 | 0.005308 |
| TRIM69                 | 0.41381698  | 0.001368 |
| WNK1                   | 0.413922763 | 0.00633  |
| RNH1                   | 0.414551424 | 0.017309 |
| LOC100507507           | 0.415538318 | 0.042124 |
| CD180                  | 0.41621955  | 0.001085 |
| DPP9                   | 0.416510413 | 0.049391 |
| LINC00599 /// MIR124-1 | 0.418008679 | 0.033869 |
| SDS                    | 0.418125076 | 0.02574  |
| LOC100507477           | 0.41897716  | 0.017856 |
| DPP9                   | 0.419132482 | 0.014479 |
| SCML4                  | 0.419407612 | 0.011283 |
| SEC31B                 | 0.419569109 | 0.015725 |
| POM121L9P              | 0.419579807 | 0.006928 |
| LDB1                   | 0.419942509 | 0.011762 |
| SPATA21                | 0.420153762 | 0.026114 |
| CNTD2                  | 0.421054925 | 0.014588 |
| TMEM116                | 0.421596284 | 0.031972 |
| ANGPTL1                | 0.421792889 | 0.045608 |
| NAGK                   | 0.422232975 | 0.018422 |
| PLXNA4                 | 0.422609391 | 0.030989 |
| MIXL1                  | 0.422690549 | 0.03622  |
| CSNK1D                 | 0.423037388 | 0.013035 |
| TMEM179                | 0.423108295 | 0.023747 |
| DIXDC1                 | 0.423424854 | 0.049401 |
| LOC642236              | 0.424123125 | 0.049175 |
| TSSC4                  | 0.424344217 | 0.02094  |
| PPARD                  | 0.425098211 | 0.048301 |

|                                                   |             |          |
|---------------------------------------------------|-------------|----------|
| IKZF3                                             | 0.425611461 | 0.000444 |
| C10orf53                                          | 0.426533417 | 0.048709 |
| WDR45                                             | 0.426669511 | 0.023177 |
| HMHA1                                             | 0.427508354 | 0.049602 |
| DPP7                                              | 0.427758813 | 0.029686 |
| MED13                                             | 0.428724097 | 0.03626  |
| FBXW7                                             | 0.42897565  | 0.006075 |
| TCR-alpha /// TRAV12-3 /// TRAV12-3 ///<br>YME1L1 | 0.428980595 | 0.020803 |
| PRDM2                                             | 0.429395422 | 0.013537 |
| TSPAN9                                            | 0.429872184 | 0.011643 |
| DERL3                                             | 0.431991052 | 0.047278 |
| HSPA12B                                           | 0.432087399 | 0.015306 |
| FAM223A /// FAM223B                               | 0.432330745 | 0.022381 |
| TTL11                                             | 0.432705702 | 0.02338  |
| ZDHHC24                                           | 0.432859064 | 0.01795  |
| CCNI                                              | 0.433033924 | 0.041462 |
| GRID1                                             | 0.433420162 | 0.029064 |
| WDR45                                             | 0.434017879 | 0.009364 |
| AC006129.2                                        | 0.434383763 | 0.02886  |
| SMG6                                              | 0.434777762 | 0.048478 |
| UBTF                                              | 0.434834436 | 0.030014 |
| CD79B                                             | 0.435577289 | 0.001009 |
| GOLGA1                                            | 0.437266542 | 0.029592 |
| PPP3CC                                            | 0.43743218  | 0.005625 |
| ZDHHC24                                           | 0.43758003  | 0.041984 |
| IFFO1                                             | 0.438226206 | 0.025539 |
| NR1D1 /// THRA                                    | 0.439134717 | 0.025622 |
| ACAP1                                             | 0.439221317 | 0.001408 |



|               |             |          |
|---------------|-------------|----------|
| SELK          | 0.439258565 | 0.041427 |
| FKBP15        | 0.439996401 | 0.038565 |
| ODF3B         | 0.440069402 | 0.002542 |
| OSBP2         | 0.440307016 | 0.025413 |
| SIRT3         | 0.440781858 | 0.02048  |
| EDF1          | 0.441073334 | 0.025676 |
| ST3GAL2       | 0.441515424 | 0.027577 |
| ERLEC1        | 0.441706831 | 0.004295 |
| LOC728040     | 0.442197467 | 0.048854 |
| B3GAT3        | 0.443584956 | 0.012615 |
| IL21R         | 0.443930446 | 0.004885 |
| CA5A          | 0.443936162 | 0.039331 |
| RP11-436D10.3 | 0.444319065 | 0.036852 |
| EMC10         | 0.444537549 | 0.017656 |
| SLC6A4        | 0.444694864 | 0.04272  |
| RARA          | 0.445069198 | 0.041297 |
| RHBDD3        | 0.445406207 | 0.041902 |
| ELMO2         | 0.445723599 | 0.01047  |
| PITPNM2       | 0.44612474  | 0.047525 |
| ANXA11        | 0.446577781 | 0.007006 |
| KIF5C         | 0.447006244 | 0.044331 |
| RSPO4         | 0.447031632 | 0.020073 |
| CTB-119C2.1   | 0.447635741 | 0.030987 |
| COBLL1        | 0.447739738 | 0.005295 |
| DOCK10        | 0.448251372 | 0.012646 |
| NAV2          | 0.448726536 | 0.040854 |
| MAST1         | 0.448915461 | 0.020528 |
| TXNDC15       | 0.449067182 | 0.009656 |
| FAM53C        | 0.449075695 | 0.042476 |

|                    |             |           |
|--------------------|-------------|-----------|
| MIR4800 /// MXD4   | 0.449418856 | 0.013935  |
| PPM1F              | 0.449829151 | 0.039967  |
| RAD50              | 0.449844393 | 0.000412  |
| TBC1D10C           | 0.450288843 | 0.001398  |
| CD81               | 0.451545394 | 0.005297  |
| UQCR11             | 0.451841322 | 0.017249  |
| IDO2               | 0.452124171 | 0.011036  |
| LOC101928845       | 0.452309975 | 0.043518  |
| XKR6               | 0.453037864 | 0.029217  |
| BCL2L1             | 0.453224566 | 0.032374  |
| FLVCR2             | 0.453268864 | 0.047656  |
| C19orf70           | 0.453568244 | 0.02865   |
| CCDC142 /// MRPL53 | 0.454108483 | 0.047216  |
| SEMA4D             | 0.454328968 | 0.005041  |
| THRA               | 0.454618691 | 0.02528   |
| SMPDL3B            | 0.454821088 | 0.03058   |
| LSM10              | 0.455622451 | 0.018136  |
| SPIB               | 0.456029651 | 0.005409  |
| DSEL               | 0.456212344 | 0.046774  |
| PPIEL              | 0.456789482 | 0.031668  |
| SETDB2             | 0.456804607 | 0.005023  |
| LOC100049716       | 0.457004015 | 0.014924  |
| LOC100996255       | 0.457098376 | 0.011679  |
| ARSA               | 0.457545178 | 0.000547  |
| DYRK4              | 0.458217245 | 0.008123  |
| COA1               | 0.459013071 | 0.008124  |
| LY9                | 0.459046868 | 0.0000572 |
| AFMID              | 0.459254264 | 0.01841   |
| GSTM5              | 0.459755512 | 0.045176  |

|                                    |             |            |
|------------------------------------|-------------|------------|
| FAM46C                             | 0.459773136 | 0.00000841 |
| ARSB                               | 0.459942228 | 0.010828   |
| TRAFD1                             | 0.460569904 | 0.045628   |
| ZNF236                             | 0.461216724 | 0.038255   |
| CIAO1                              | 0.461802015 | 0.028856   |
| VPS39                              | 0.463382403 | 0.039051   |
| MEI1                               | 0.463482871 | 0.001024   |
| CCDC159                            | 0.464298307 | 0.041909   |
| PYHIN1                             | 0.464851703 | 0.029541   |
| SLC12A1                            | 0.464852971 | 0.037612   |
| ING4                               | 0.464940207 | 0.019085   |
| POU2F2                             | 0.466105012 | 0.003901   |
| MCF2                               | 0.466263316 | 0.047431   |
| C11orf68                           | 0.466313693 | 0.03451    |
| TRIM35                             | 0.466317269 | 0.049062   |
| MAPK10                             | 0.466859005 | 0.008162   |
| ZNF791                             | 0.467067883 | 0.009549   |
| ZNF641                             | 0.467131837 | 0.01928    |
| TRABD2B                            | 0.467144445 | 0.033234   |
| FMNL3                              | 0.467402937 | 0.021538   |
| ZNF652                             | 0.468648141 | 0.022053   |
| KRTCAP2                            | 0.468761797 | 0.037061   |
| FGD2                               | 0.469063338 | 0.032179   |
| MIF4GD                             | 0.469408169 | 0.006701   |
| TRAF3IP3                           | 0.469564115 | 0.045911   |
| KIAA1755                           | 0.469583497 | 0.042322   |
| ARL17A /// ARL17B /// LOC100294341 | 0.470055185 | 0.0000746  |
| LAT                                | 0.47062845  | 0.010736   |
| EZH1                               | 0.471106971 | 0.020941   |

|                       |             |          |
|-----------------------|-------------|----------|
| AZIN2                 | 0.471667072 | 0.033307 |
| CXorf40A /// CXorf40B | 0.471948237 | 0.019697 |
| SOCS2-AS1             | 0.472057131 | 0.044903 |
| MAP4K1                | 0.47229631  | 0.009494 |
| PLA2G5                | 0.472540084 | 0.035804 |
| TOLLIP                | 0.472550303 | 0.033244 |
| RRP8                  | 0.472837159 | 0.027181 |
| ARHGAP17              | 0.473115297 | 0.011785 |
| LINC01023             | 0.47351337  | 0.013503 |
| FCRL4                 | 0.473912617 | 0.011582 |
| H1FNT                 | 0.47403582  | 0.034477 |
| DENND6B               | 0.474143572 | 0.024136 |
| NICN1                 | 0.474639247 | 0.019433 |
| BRF2                  | 0.475031124 | 0.031023 |
| SEMA4A                | 0.476332631 | 0.004482 |
| TNFAIP2               | 0.476459507 | 0.023813 |
| IGHG1                 | 0.476650798 | 0.038805 |
| TERF2IP               | 0.477963784 | 0.027617 |
| SERINC3               | 0.478057366 | 0.014185 |
| IL16                  | 0.47819066  | 0.000705 |
| POLR2L                | 0.478353714 | 0.005227 |
| FAM214B               | 0.479712876 | 0.034191 |
| CLEC1A                | 0.479943224 | 0.022345 |
| GNG7                  | 0.48008146  | 0.00557  |
| CXorf40A              | 0.480158719 | 0.015186 |
| KRT10                 | 0.480313981 | 0.017069 |
| ROBO3                 | 0.481130921 | 0.007906 |
| CXorf40B              | 0.481650732 | 0.01828  |
| GLIS2                 | 0.482045192 | 0.009178 |

|              |             |           |
|--------------|-------------|-----------|
| MVB12B       | 0.482659465 | 0.019809  |
| ZNF791       | 0.482976846 | 0.032439  |
| SAFB         | 0.48321368  | 0.04303   |
| IFFO1        | 0.483851198 | 0.005959  |
| DSCAM        | 0.485067208 | 0.04265   |
| SCARB2       | 0.486396637 | 0.017399  |
| MAN2B1       | 0.486747212 | 0.002672  |
| USP11        | 0.487308064 | 0.012968  |
| CXorf65      | 0.487590217 | 0.030239  |
| LRP10        | 0.487695241 | 0.005689  |
| MLXIP        | 0.488238124 | 0.006118  |
| ENTPD1       | 0.488953661 | 0.003181  |
| FLT3LG       | 0.489016273 | 0.01891   |
| HERPUD1      | 0.489130881 | 0.001369  |
| IL16         | 0.489673332 | 0.024752  |
| IGHA1        | 0.490457436 | 0.039378  |
| DEF6         | 0.490864655 | 0.006598  |
| RAB30        | 0.491303703 | 0.0000381 |
| CLUHP3       | 0.491576648 | 0.002063  |
| PCDHAC1      | 0.491940301 | 0.017417  |
| FBXW7        | 0.491946449 | 0.001433  |
| CNNM2        | 0.49209772  | 0.028993  |
| LYST         | 0.492129984 | 0.02683   |
| DCAF5        | 0.493052224 | 0.023625  |
| MIF4GD       | 0.495635189 | 0.023797  |
| ULK1         | 0.496437397 | 0.017193  |
| LOC102723479 | 0.496615894 | 0.004858  |
| TMEM129      | 0.497250472 | 0.038229  |
| NAT9         | 0.497475779 | 0.01916   |

|                     |             |          |
|---------------------|-------------|----------|
| IKZF4               | 0.497936096 | 0.005159 |
| TMEM155             | 0.498002137 | 0.038173 |
| DHX30               | 0.4981639   | 0.0359   |
| SH2D3C              | 0.498353944 | 0.020182 |
| PGAP3               | 0.498901947 | 0.013045 |
| MDP1 /// NEDD8-MDP1 | 0.499184059 | 0.017573 |
| EDF1                | 0.499232849 | 0.049574 |
| FCGRT               | 0.499991048 | 0.001015 |
| SETDB2              | 0.501211087 | 0.040661 |
| SLC35E1             | 0.50127575  | 0.027891 |
| AP006222.2          | 0.501317755 | 0.021523 |
| MOB3A               | 0.502069921 | 0.03129  |
| ARL6IP4             | 0.502432547 | 0.027631 |
| BTN2A2              | 0.502522141 | 0.019812 |
| IGHA1               | 0.502889905 | 0.040208 |
| LRRC23              | 0.503000988 | 0.008641 |
| SYNGAP1             | 0.503842731 | 0.038562 |
| MCPH1               | 0.504095476 | 0.029096 |
| C1GALT1C1           | 0.504794135 | 0.015547 |
| BTLA                | 0.505212902 | 0.013516 |
| MYO1C               | 0.505441033 | 0.029596 |
| LOC101927943        | 0.505942782 | 0.019966 |
| GIMAP1              | 0.506641137 | 0.00618  |
| LAT                 | 0.506753304 | 0.008732 |
| CCNG2               | 0.506843971 | 0.005263 |
| ZSWIM3              | 0.50742952  | 0.046528 |
| MFSD5               | 0.507611191 | 0.025241 |
| GIMAP1              | 0.507737206 | 0.016351 |
| SEL1L               | 0.508052207 | 0.012092 |

|                       |             |          |
|-----------------------|-------------|----------|
| ZNF791                | 0.508533262 | 0.019933 |
| SAT1                  | 0.509235082 | 0.019012 |
| BZRAP1-AS1            | 0.509292261 | 0.019961 |
| TESPA1                | 0.509445736 | 0.042777 |
| HEXDC                 | 0.509776427 | 0.049972 |
| PTPN7                 | 0.510691909 | 0.003539 |
| CLPTMIL               | 0.511018696 | 0.01583  |
| SPCS3                 | 0.511049427 | 0.015857 |
| CD1B                  | 0.511435178 | 0.011543 |
| SLC25A45              | 0.511725517 | 0.033101 |
| IGLV4-3 /// IGLV4-3   | 0.512151334 | 0.031646 |
| NFIC                  | 0.512216548 | 0.006606 |
| BTG2                  | 0.512321651 | 0.000343 |
| VPREB3                | 0.514012854 | 0.000962 |
| RP11-399O19.9         | 0.514719636 | 0.035506 |
| PLXDC1                | 0.515149238 | 0.001158 |
| PRKD2                 | 0.515697075 | 0.023411 |
| NECAP2                | 0.515815388 | 0.021141 |
| CCDC57                | 0.516152771 | 0.024344 |
| ATP5G2P1 /// ATP5G2P1 | 0.516256277 | 0.041514 |
| CLPTMIL               | 0.516392026 | 0.004438 |
| FCRLA                 | 0.517168638 | 0.002138 |
| KSR2                  | 0.517391452 | 0.012186 |
| FAM50A                | 0.517867188 | 0.003517 |
| SLC30A4               | 0.518067732 | 0.008171 |
| CYLD                  | 0.518252246 | 0.003989 |
| SH2B1                 | 0.518858952 | 0.033705 |
| ZDHHC24               | 0.519242877 | 0.033038 |
| ANAPC4                | 0.519368318 | 0.046861 |

|                             |             |          |
|-----------------------------|-------------|----------|
| SIL1                        | 0.519385131 | 0.01861  |
| TXNDC11                     | 0.519436024 | 0.006896 |
| LOC100652930                | 0.520019027 | 0.004305 |
| C5orf56                     | 0.520408802 | 0.003843 |
| LUC7L                       | 0.520676616 | 0.028502 |
| BLK                         | 0.520917411 | 0.032815 |
| SLC25A35                    | 0.520948429 | 0.042676 |
| UBTD1                       | 0.521003807 | 0.041145 |
| ZNF37BP                     | 0.521628528 | 0.020813 |
| N4BP2L1                     | 0.522004415 | 0.026328 |
| HTR1F                       | 0.522290123 | 0.023342 |
| HMHA1                       | 0.522772693 | 0.009903 |
| ZBTB4                       | 0.523328875 | 0.040948 |
| SEC14L1P1                   | 0.523919602 | 0.025818 |
| SYNPO2                      | 0.524002101 | 0.042647 |
| LOC286272                   | 0.524317998 | 0.014789 |
| TRIM66                      | 0.524611081 | 0.015721 |
| FAM89B                      | 0.524791836 | 0.027473 |
| PARP11                      | 0.525230026 | 0.00729  |
| FCRLA                       | 0.5261992   | 0.005736 |
| ANTXR1                      | 0.526361646 | 0.028966 |
| DNAJB9                      | 0.526513178 | 0.003108 |
| ZC3H13                      | 0.526523124 | 0.025505 |
| HRCT1                       | 0.526697271 | 0.035605 |
| ZSWIM8                      | 0.527566866 | 0.023217 |
| GFRA1                       | 0.528016399 | 0.017661 |
| ADORA2A /// SPECC1L-ADORA2A | 0.528752105 | 0.044844 |
| CCS                         | 0.529262128 | 0.030553 |
| LOC100131043                | 0.529326608 | 0.021336 |



|                     |             |          |
|---------------------|-------------|----------|
| SEL1L               | 0.529705619 | 0.002107 |
| HDAC5               | 0.529786168 | 0.02662  |
| PRDX4               | 0.530154779 | 0.005788 |
| KLHL6               | 0.531187473 | 0.032976 |
| CIAO1               | 0.531188524 | 0.015021 |
| FCRL5               | 0.531766694 | 0.000393 |
| ITIH3               | 0.531778734 | 0.039595 |
| IFNAR2              | 0.532225983 | 0.027202 |
| BMF                 | 0.532316674 | 0.024736 |
| P2RY8               | 0.532485517 | 0.000283 |
| LUC7L               | 0.532758376 | 0.019159 |
| CD99L2              | 0.532942866 | 0.00315  |
| NFX1                | 0.533435924 | 0.039023 |
| TLR10               | 0.533564242 | 0.017412 |
| CTSA                | 0.533733861 | 0.003573 |
| TMEM205             | 0.534102365 | 0.010118 |
| CREBL2              | 0.534214352 | 0.023038 |
| SAT1                | 0.53431513  | 0.026488 |
| UBE2J1              | 0.534526607 | 0.011913 |
| LINC00341 /// SYNE3 | 0.534575802 | 0.001755 |
| LY9                 | 0.535086381 | 0.025189 |
| AKAP17A             | 0.535327762 | 0.01572  |
| PRND                | 0.535517596 | 0.026005 |
| JSRP1               | 0.535852132 | 0.026117 |
| RHBDF1              | 0.536673824 | 0.047761 |
| RELB                | 0.536717671 | 0.029632 |
| SMAD7               | 0.536743855 | 0.001542 |
| BTN2A2              | 0.536797545 | 0.023454 |
| TAF10               | 0.536981735 | 0.01698  |

|                                                                               |             |          |
|-------------------------------------------------------------------------------|-------------|----------|
| PPM1K                                                                         | 0.537374834 | 0.000546 |
| KCNMB1                                                                        | 0.537417701 | 0.006118 |
| FBN3                                                                          | 0.537425953 | 0.042877 |
| CXorf40A /// CXorf40B                                                         | 0.538313972 | 0.046634 |
| TOPORS-AS1                                                                    | 0.538616023 | 0.015298 |
| CCND2                                                                         | 0.53878482  | 0.000753 |
| KLHL9                                                                         | 0.538821657 | 0.034575 |
| TNFRSF4                                                                       | 0.539088421 | 0.036141 |
| CDH11                                                                         | 0.539093177 | 0.001219 |
| TMED1                                                                         | 0.539508529 | 0.035538 |
| ITPKB                                                                         | 0.539669327 | 0.006644 |
| AF086288 /// RP11-768F21.1                                                    | 0.539747482 | 0.033494 |
| DENND5A                                                                       | 0.53995999  | 0.024014 |
| Igk                                                                           | 0.540105819 | 0.026383 |
| ERP29                                                                         | 0.54047817  | 0.023352 |
| GDF11                                                                         | 0.540765504 | 0.009384 |
| RHOQ                                                                          | 0.541053485 | 0.024035 |
| SLC26A11                                                                      | 0.541157621 | 0.036871 |
| C12orf57                                                                      | 0.541225195 | 0.023018 |
| FES                                                                           | 0.541481858 | 0.035004 |
| C11orf31                                                                      | 0.541485346 | 0.045643 |
| GDF11                                                                         | 0.54204209  | 0.025816 |
| LY9                                                                           | 0.542070173 | 0.017768 |
| TFE3                                                                          | 0.542136554 | 0.042837 |
| FMOD                                                                          | 0.542827115 | 0.003331 |
| PLCG2                                                                         | 0.54290027  | 0.004983 |
| IGHA1 /// IGHA2 /// IGHG1 /// IGHG4 ///<br>IGHM /// IGHV4-31 /// LOC102723407 | 0.543043362 | 0.010748 |
| SMPD1                                                                         | 0.543210234 | 0.022011 |

|                         |             |           |
|-------------------------|-------------|-----------|
| CCDC142                 | 0.543286385 | 0.030714  |
| ABHD17A                 | 0.543750894 | 0.03969   |
| AP2A2                   | 0.544064925 | 0.03975   |
| ZCCHC2                  | 0.544333517 | 0.004168  |
| PNPO                    | 0.54437874  | 0.032939  |
| TP53INP1                | 0.544419384 | 0.0000975 |
| TOPORS-AS1              | 0.545146804 | 0.038441  |
| SLC22A17                | 0.545325288 | 0.009504  |
| CCPG1 /// DYX1C1-CCPG1  | 0.545462273 | 0.007236  |
| ZNF75D                  | 0.545480833 | 0.004104  |
| C11orf71                | 0.545595991 | 0.011512  |
| PLBD2                   | 0.545790392 | 0.031293  |
| PPAPDC1B                | 0.545874053 | 0.003825  |
| GAS6                    | 0.54592774  | 0.017461  |
| APLNR                   | 0.546423064 | 0.011411  |
| RAB30                   | 0.546591603 | 0.0000867 |
| KANK3                   | 0.546641219 | 0.032799  |
| STARD5                  | 0.546669106 | 0.033219  |
| EVC                     | 0.548427526 | 0.032868  |
| CLEC2D                  | 0.548898593 | 0.026467  |
| CHD3                    | 0.548975026 | 0.045747  |
| C19orf52                | 0.549529951 | 0.023592  |
| PDE7A                   | 0.550235476 | 0.031206  |
| LOC158960               | 0.550470262 | 0.014678  |
| XIAP                    | 0.550619166 | 0.035558  |
| SYCE3                   | 0.551099743 | 0.04024   |
| FAM78A /// LOC101927137 | 0.55184453  | 0.028268  |
| RUSC1-AS1               | 0.552033051 | 0.019372  |
| FAM134C                 | 0.552046    | 0.022292  |

|                           |             |             |
|---------------------------|-------------|-------------|
| MICAL1                    | 0.553735122 | 0.015879    |
| BLOC1S5-TXNDC5 /// TXNDC5 | 0.554035138 | 0.014707    |
| ARHGAP9                   | 0.554513032 | 0.002664    |
| PEBP1                     | 0.554546287 | 0.009413    |
| PLXDC1                    | 0.555025486 | 0.001508    |
| SIRT4                     | 0.555158681 | 0.030244    |
| IRF4                      | 0.555551906 | 0.001274    |
| SPACA6P                   | 0.55605407  | 0.022284    |
| EBI3                      | 0.556352857 | 0.033311    |
| DENND1C                   | 0.557136576 | 0.032892    |
| LOC285074 /// LOC730268   | 0.557139776 | 0.021581    |
| KDM2A                     | 0.557269539 | 0.047106    |
| CXCR3                     | 0.55780305  | 0.023718    |
| AMPD1                     | 0.558042834 | 0.000738    |
| SAT2                      | 0.558525456 | 0.030584    |
| MAP4K1                    | 0.558736097 | 0.034486    |
| TNFAIP8                   | 0.558944579 | 0.013586    |
| NCOR2                     | 0.560053273 | 0.027601    |
| PIM2                      | 0.560297878 | 0.000308    |
| NRXN3                     | 0.560456189 | 0.03469     |
| POU2F2                    | 0.561069277 | 0.020411    |
| ALAD                      | 0.561084262 | 0.03408     |
| XIAP                      | 0.561216577 | 0.022772    |
| FAM46C                    | 0.561529227 | 0.000000439 |
| CD79A                     | 0.561700644 | 0.003754    |
| PKHD1L1                   | 0.562132616 | 0.002016    |
| CTA-292E10.6              | 0.562431828 | 0.002296    |
| ODF3B                     | 0.562863286 | 0.00829     |
| PRELP                     | 0.562962836 | 0.000716    |

|                          |             |          |
|--------------------------|-------------|----------|
| ZBTB46                   | 0.563644984 | 0.049306 |
| STAP1                    | 0.564087772 | 0.021881 |
| ENGASE                   | 0.564435198 | 0.047371 |
| BTK                      | 0.565628319 | 0.008849 |
| SIGIRR                   | 0.565947719 | 0.0351   |
| VAMP1                    | 0.566689644 | 0.001645 |
| IL11RA                   | 0.566739277 | 0.031748 |
| ERN1                     | 0.566811339 | 0.004308 |
| AP2A2                    | 0.567339943 | 0.049142 |
| CREB3L2                  | 0.567506336 | 0.038128 |
| GAB3                     | 0.568513557 | 0.0076   |
| RHOQ                     | 0.568673522 | 0.039263 |
| MAP3K13                  | 0.568988669 | 0.028889 |
| CCPG1 /// DYX1C1-CCPG1   | 0.569139166 | 0.010739 |
| TUBG2                    | 0.569770582 | 0.039967 |
| SLC10A3                  | 0.570386816 | 0.025429 |
| MIR10A                   | 0.57067761  | 0.046299 |
| TMEM150A                 | 0.570850782 | 0.02913  |
| IDS                      | 0.571055405 | 0.000199 |
| F8A1 /// F8A2 /// F8A3   | 0.571087663 | 0.006582 |
| MBD2                     | 0.57139328  | 0.03847  |
| DNMT3A                   | 0.571545586 | 0.025319 |
| BCAS4                    | 0.571735033 | 0.004441 |
| SBSN                     | 0.572179959 | 0.046377 |
| GIMAP1-GIMAP5 /// GIMAP5 | 0.572726615 | 0.044869 |
| LOC728392                | 0.573052425 | 0.015911 |
| DNAJB2                   | 0.573749423 | 0.049087 |
| IKZF1                    | 0.573901172 | 0.018098 |
| ORAI1                    | 0.574805484 | 0.040063 |

|                |             |          |
|----------------|-------------|----------|
| ITGAL          | 0.575369913 | 0.01264  |
| SIGIRR         | 0.575492453 | 0.046118 |
| C11orf80       | 0.575643741 | 0.024552 |
| VKORC1         | 0.575845449 | 0.041781 |
| LCP2           | 0.57626464  | 0.032672 |
| ATP6AP1        | 0.576433466 | 0.044248 |
| SLAMF1         | 0.576483968 | 0.004718 |
| NOX4           | 0.576702526 | 0.041097 |
| CYP2R1         | 0.576998434 | 0.009141 |
| FYCO1          | 0.5772003   | 0.009878 |
| KCNA3          | 0.57749107  | 0.004756 |
| JAK3           | 0.577777051 | 0.005562 |
| CYLD           | 0.577814578 | 0.024504 |
| CD27           | 0.578285319 | 0.000308 |
| GNPTAB         | 0.579414587 | 0.013356 |
| ERICH1         | 0.580027089 | 0.021761 |
| COL9A2         | 0.580291396 | 0.011476 |
| SWAP70         | 0.580906272 | 0.007866 |
| PHF11          | 0.581502512 | 0.02218  |
| PODN           | 0.581921246 | 0.012114 |
| IL21R          | 0.582484358 | 0.002462 |
| CREBL2         | 0.5825422   | 0.00943  |
| PAPPA          | 0.583386235 | 0.02278  |
| NMRK1          | 0.583889119 | 0.01138  |
| CYLD           | 0.584715755 | 0.005849 |
| HIP1R          | 0.585873849 | 0.034927 |
| KRT10          | 0.585922642 | 0.03736  |
| CARD9 /// DNLZ | 0.586877844 | 0.043694 |
| PARVA          | 0.587496298 | 0.029304 |

|               |             |          |
|---------------|-------------|----------|
| CYAT1         | 0.587649493 | 0.002234 |
| EVL           | 0.587744422 | 0.01312  |
| TENM4         | 0.588446802 | 0.00581  |
| RASSF5        | 0.588671018 | 0.025979 |
| TENC1         | 0.58911959  | 0.045802 |
| PPP1R16B      | 0.589147501 | 0.019695 |
| LILRA5        | 0.589440381 | 0.048984 |
| SNRNP200      | 0.59076956  | 0.01058  |
| ATP6V1E2      | 0.591083049 | 0.028464 |
| SPSB2         | 0.591101986 | 0.003195 |
| LOC100506476  | 0.591266308 | 0.020225 |
| SPRY1         | 0.591267269 | 0.02238  |
| HIPK2         | 0.591428322 | 0.006559 |
| RNF212        | 0.591531188 | 0.031624 |
| ERN1          | 0.592448673 | 0.000464 |
| TCP11L2       | 0.592562168 | 0.034572 |
| C2CD2         | 0.592996807 | 0.03143  |
| TIFA          | 0.593121169 | 0.022251 |
| FCRL3         | 0.593451922 | 0.001028 |
| MICA /// MICB | 0.594045499 | 0.041163 |
| GAS6          | 0.594526027 | 0.009986 |
| A2M-AS1       | 0.594799102 | 0.022709 |
| LOC100293211  | 0.595222106 | 0.000613 |
| RP3-525N10.2  | 0.595280502 | 0.035549 |
| RAB24         | 0.596924776 | 0.032857 |
| EIF2AK3       | 0.598022686 | 0.037701 |
| CLDND1        | 0.598674438 | 0.030835 |
| TNIP2         | 0.599036301 | 0.03644  |
| TNFRSF25      | 0.599176736 | 0.013686 |

|                               |             |          |
|-------------------------------|-------------|----------|
| TRAF3IP3                      | 0.600095372 | 0.024569 |
| RNF144A-AS1                   | 0.600116447 | 0.034859 |
| MIR4800 /// MXD4              | 0.600679914 | 0.023125 |
| IGHA1                         | 0.601752394 | 0.002638 |
| ARHGAP9                       | 0.602405688 | 0.030942 |
| NTHL1                         | 0.602525558 | 0.030024 |
| LRRC69                        | 0.602633799 | 0.020313 |
| ZCCHC24                       | 0.603712568 | 0.022618 |
| SPOP                          | 0.603871536 | 0.026146 |
| NFATC2                        | 0.604668243 | 0.005086 |
| CC2D1B                        | 0.605216679 | 0.044982 |
| LOC100294341 /// LOC101929774 | 0.60529958  | 0.001768 |
| HCST                          | 0.605884129 | 0.017096 |
| DDX26B                        | 0.605947427 | 0.021373 |
| UEVLD                         | 0.606082897 | 0.025419 |
| GFI1                          | 0.60658457  | 0.047737 |
| ARHGAP9                       | 0.607503615 | 0.015941 |
| LBH                           | 0.609237601 | 0.006793 |
| KIAA0922                      | 0.609688983 | 0.029009 |
| LINC00893                     | 0.610809372 | 0.007212 |
| TMEM134                       | 0.61122936  | 0.037058 |
| IL10RA                        | 0.611539565 | 0.004119 |
| ERBB2                         | 0.612422117 | 0.027055 |
| PXMP4                         | 0.612834498 | 0.012346 |
| ITPKB                         | 0.612895129 | 0.01095  |
| LAX1                          | 0.613278422 | 0.000232 |
| SWAP70                        | 0.613413085 | 0.02545  |
| MUM1                          | 0.614126993 | 0.027218 |
| CCPG1 /// DYX1C1-CCPG1        | 0.614176842 | 0.025563 |



|              |             |          |
|--------------|-------------|----------|
| PNOC         | 0.614294948 | 0.000937 |
| CBX7         | 0.614438855 | 0.021287 |
| IKZF1        | 0.614441024 | 0.027584 |
| CTGF         | 0.614583182 | 0.004833 |
| FCRLA        | 0.615109293 | 0.001426 |
| DUSP16       | 0.615402377 | 0.030992 |
| TAPBPL       | 0.616309519 | 0.016874 |
| LRPAP1       | 0.616371862 | 0.048004 |
| TCEAL3       | 0.616650293 | 0.039646 |
| PBXIP1       | 0.61673443  | 0.02811  |
| ANKFN1       | 0.616836157 | 0.035092 |
| MAGEH1       | 0.617580694 | 0.00685  |
| LOC101928152 | 0.6177318   | 0.024522 |
| CD19         | 0.618190586 | 0.005397 |
| PMP22        | 0.618802711 | 0.04712  |
| RAB39B       | 0.620209491 | 0.042423 |
| CYP2R1       | 0.620230326 | 0.007953 |
| CCND2        | 0.621116477 | 0.002019 |
| DAPP1        | 0.621621938 | 0.043224 |
| CPNE5        | 0.622303565 | 0.018415 |
| IGHV3-54     | 0.623424763 | 0.004879 |
| HLA-DOB      | 0.624206106 | 0.002966 |
| VAV1         | 0.6244408   | 0.044755 |
| PPP1R16B     | 0.62465164  | 0.005103 |
| MICA         | 0.625125947 | 0.008402 |
| KIAA0125     | 0.625167544 | 0.000138 |
| CD99L2       | 0.625271224 | 0.017673 |
| SASH3        | 0.625393683 | 0.011703 |
| IKZF4        | 0.625693317 | 0.016575 |

|                              |             |          |
|------------------------------|-------------|----------|
| TGFB111                      | 0.627055169 | 0.009505 |
| ASB8                         | 0.627142649 | 0.011672 |
| RGS3                         | 0.62725843  | 0.04335  |
| ARHGAP30                     | 0.627288403 | 0.008811 |
| NXPE3                        | 0.627336753 | 0.012349 |
| CYLD                         | 0.627450324 | 0.034581 |
| HEBP1                        | 0.627836923 | 0.038816 |
| PEBP1                        | 0.627873503 | 0.040679 |
| C1R                          | 0.627943877 | 0.014776 |
| PTPRCAP                      | 0.62804667  | 0.020628 |
| EFR3B                        | 0.628172965 | 0.032965 |
| STAP1                        | 0.628178274 | 0.002852 |
| CKAP2                        | 0.628255946 | 0.002628 |
| SYNGR2                       | 0.628658475 | 0.049607 |
| TFEB                         | 0.628762038 | 0.021715 |
| CD3G                         | 0.629095825 | 0.019543 |
| ARHGAP27                     | 0.629378136 | 0.011036 |
| SPTB                         | 0.62951695  | 0.036364 |
| RP6-201G10.2                 | 0.629910144 | 0.020893 |
| FAM101B                      | 0.630248382 | 0.031552 |
| CYAT1 /// IGLC1 /// IGLV1-44 | 0.630485813 | 0.005669 |
| N4BP2L2                      | 0.630499265 | 0.029447 |
| LTBP2                        | 0.630808638 | 0.004467 |
| MVB12B                       | 0.63090006  | 0.046968 |
| SEL1L3                       | 0.631153577 | 0.016649 |
| NCF1 /// NCF1B /// NCF1C     | 0.631389817 | 0.022672 |
| NCF4                         | 0.632523838 | 0.011978 |
| LOC101930405                 | 0.632540837 | 0.003915 |
| CD53                         | 0.632740197 | 0.015531 |

|                                       |             |          |
|---------------------------------------|-------------|----------|
| PCED1B                                | 0.633053839 | 0.037264 |
| EVL                                   | 0.633112454 | 0.016252 |
| TRIM8                                 | 0.633585301 | 0.045613 |
| LOC100294341 /// LOC101929774         | 0.634476906 | 0.030182 |
| LINC00116                             | 0.635059382 | 0.015705 |
| DOCK8                                 | 0.635159182 | 0.025623 |
| ZNF503-AS1                            | 0.635180768 | 0.02054  |
| ENTPD1                                | 0.63542155  | 0.015737 |
| LAT2                                  | 0.635811109 | 0.014804 |
| TMEM132D                              | 0.636086337 | 0.027156 |
| SDC1                                  | 0.636595263 | 0.008872 |
| DKK3                                  | 0.636723127 | 0.017272 |
| TBC1D16                               | 0.637704669 | 0.029765 |
| CYP2E1                                | 0.637940184 | 0.015774 |
| SPOCK2                                | 0.638134152 | 0.034791 |
| ARHGEF6                               | 0.638723676 | 0.026761 |
| CCL22                                 | 0.638918307 | 0.030289 |
| IGHA1                                 | 0.639277418 | 0.003233 |
| MDP1 /// NEDD8-MDP1                   | 0.63933675  | 0.038502 |
| IGKC /// IGKV1-5 /// IGKV1-5 /// IGL@ | 0.639540068 | 0.008422 |
| FZD8 /// MIR4683                      | 0.639826443 | 0.023918 |
| FKBP11                                | 0.639969801 | 0.000923 |
| ATRX                                  | 0.639984349 | 0.048472 |
| NT5E                                  | 0.640541406 | 0.041317 |
| PRELP                                 | 0.640663409 | 0.010256 |
| SEPW1                                 | 0.640923161 | 0.043648 |
| CADM4                                 | 0.642221963 | 0.015039 |
| C1S                                   | 0.642723053 | 0.00935  |
| IGLC1 /// IGLV2-5 /// IGLV2-5         | 0.642726714 | 0.000439 |

|                                                                                   |             |          |
|-----------------------------------------------------------------------------------|-------------|----------|
| SHROOM4                                                                           | 0.642949562 | 0.033127 |
| SELPLG                                                                            | 0.643235378 | 0.036499 |
| BCAS4                                                                             | 0.643284684 | 0.005451 |
| JADE2                                                                             | 0.643897262 | 0.021287 |
| IDS                                                                               | 0.64438963  | 0.004752 |
| mir-223                                                                           | 0.644462093 | 0.046484 |
| AEBP1                                                                             | 0.644583432 | 0.003875 |
| MTDH                                                                              | 0.644984058 | 0.034435 |
| STK17B                                                                            | 0.645352043 | 0.034939 |
| MSN                                                                               | 0.645361792 | 0.022988 |
| IL21R                                                                             | 0.646825358 | 0.026984 |
| RASGRF2                                                                           | 0.646880024 | 0.019786 |
| PYHIN1                                                                            | 0.646905179 | 0.015235 |
| PLCG2                                                                             | 0.647137483 | 0.010828 |
| KLHDC4                                                                            | 0.647146955 | 0.046073 |
| IGHD                                                                              | 0.647233618 | 0.028698 |
| LTBP1                                                                             | 0.647244444 | 0.021056 |
| MLXIP                                                                             | 0.647575657 | 0.034879 |
| LOC100996724 /// LOC100996761 ///<br>LOC101929792 /// LOC101930416 ///<br>PDE4DIP | 0.647859433 | 0.047198 |
| PPAPDC1B                                                                          | 0.649006669 | 0.023187 |
| MTDH                                                                              | 0.649161691 | 0.043657 |
| SEMA6D                                                                            | 0.649223546 | 0.004652 |
| YPEL3                                                                             | 0.649262543 | 0.028305 |
| CA11                                                                              | 0.649563641 | 0.005544 |
| LTBP2                                                                             | 0.649639715 | 0.013614 |
| CCDC151                                                                           | 0.649669317 | 0.040092 |
| CMC4                                                                              | 0.65046624  | 0.02689  |

|                                             |             |          |
|---------------------------------------------|-------------|----------|
| PAIP2B                                      | 0.650775117 | 0.015696 |
| SBF2                                        | 0.650859812 | 0.035983 |
| AL928768.3 /// Ig alpha 1-[alpha]2m /// IGH | 0.651879129 | 0.000841 |
| TAPBPL                                      | 0.652467291 | 0.0187   |
| CD79A                                       | 0.654108295 | 0.001218 |
| CMC4                                        | 0.654513563 | 0.040983 |
| GLCC11                                      | 0.655754299 | 0.00465  |
| VDR                                         | 0.656002116 | 0.015879 |
| LOC101060604 /// SLC7A5P1 ///<br>SLC7A5P2   | 0.656190256 | 0.026125 |
| TMEM156                                     | 0.657106791 | 0.016567 |
| GVINP1                                      | 0.657455418 | 0.044262 |
| IGLV6-57                                    | 0.658112567 | 0.00531  |
| ST6GALNAC4                                  | 0.65830619  | 0.03119  |
| ELL2                                        | 0.65909989  | 0.043933 |
| MOB1B                                       | 0.659287542 | 0.030584 |
| ZBP1                                        | 0.659572314 | 0.007614 |
| TMEM129                                     | 0.659655173 | 0.015712 |
| KMT2A                                       | 0.659663655 | 0.047834 |
| GPR155                                      | 0.659883566 | 0.011591 |
| PPM1K                                       | 0.660091298 | 0.001979 |
| EBF1                                        | 0.660734495 | 0.025362 |
| TIMP3                                       | 0.660922794 | 0.015479 |
| ANKRD36BP2                                  | 0.661206145 | 0.000844 |
| COBLL1                                      | 0.661370294 | 0.048399 |
| PMP22                                       | 0.662469864 | 0.016595 |
| ADARB1                                      | 0.662875052 | 0.045461 |
| KIZ                                         | 0.664419329 | 0.024821 |
| MCC                                         | 0.664480628 | 0.002527 |

|                    |             |          |
|--------------------|-------------|----------|
| FAM198B            | 0.664770249 | 0.004104 |
| HSPB8              | 0.664926124 | 0.001401 |
| TNFRSF25           | 0.665144314 | 0.023697 |
| ST6GALNAC4         | 0.665235232 | 0.015917 |
| FAM129A            | 0.665617032 | 0.001447 |
| MEG3               | 0.665803301 | 0.028133 |
| TK2                | 0.666630524 | 0.035546 |
| LRRC23 /// RPL13P5 | 0.666988836 | 0.016888 |
| PECAM1             | 0.667443719 | 0.04261  |
| FLVCR2             | 0.667491536 | 0.012387 |
| MAN1A1             | 0.667681174 | 0.011913 |
| SLC1A4             | 0.66772476  | 0.021769 |
| SYNPO2             | 0.667831214 | 0.036062 |
| MS4A1              | 0.668220225 | 0.022908 |
| PIGG               | 0.668783028 | 0.046067 |
| ZNF532             | 0.668846953 | 0.033782 |
| TAPT1              | 0.669129025 | 0.020141 |
| PPAPDC1B           | 0.669243831 | 0.0346   |
| JAM2               | 0.669257863 | 0.0366   |
| CD1D               | 0.66985475  | 0.015338 |
| GAPT               | 0.670059319 | 0.024524 |
| NFATC2             | 0.671078892 | 0.020866 |
| IL27RA             | 0.671309108 | 0.01942  |
| NEDD4L             | 0.671852528 | 0.003409 |
| TTC39C             | 0.671964106 | 0.00873  |
| SYNE1              | 0.672028224 | 0.022836 |
| EPC1               | 0.672161525 | 0.042265 |
| LTBP3              | 0.672487323 | 0.026712 |
| CCPG1              | 0.672710646 | 0.041759 |

|                          |             |          |
|--------------------------|-------------|----------|
| UVSSA                    | 0.673000366 | 0.023289 |
| PDE4A                    | 0.67308563  | 0.013262 |
| GPX7                     | 0.673587342 | 0.009679 |
| B4GALNT3                 | 0.673793391 | 0.013438 |
| FKBP11                   | 0.673973822 | 0.004018 |
| ZNF275                   | 0.674356992 | 0.027254 |
| NOD2                     | 0.675339638 | 0.044917 |
| CORO1A                   | 0.675839842 | 0.040623 |
| TMEM116                  | 0.677392883 | 0.048654 |
| IGHA1 /// IGHG1 /// IGHM | 0.677398098 | 0.006043 |
| SLC44A1                  | 0.677477309 | 0.04641  |
| GPR155                   | 0.677828523 | 0.032605 |
| LPXN                     | 0.677940875 | 0.034821 |
| DNAJB9                   | 0.678114625 | 0.032605 |
| NXPE3                    | 0.678437875 | 0.01708  |
| ARMCX3                   | 0.678596181 | 0.036618 |
| ZNF532                   | 0.678897098 | 0.041962 |
| CDH11                    | 0.679147229 | 0.010445 |
| DERL3                    | 0.680105584 | 0.001894 |
| FCRL2                    | 0.680189215 | 0.030651 |
| RAB39B                   | 0.680210169 | 0.029276 |
| LOC101928789 /// SP140   | 0.680315326 | 0.02605  |
| ELMO1                    | 0.680357628 | 0.029589 |
| TSTD1                    | 0.681190186 | 0.016659 |
| KDSR                     | 0.681600664 | 0.014285 |
| RFTN1                    | 0.682276894 | 0.023288 |
| TSC22D3                  | 0.682691041 | 0.014559 |
| GPR68                    | 0.682854276 | 0.035262 |
| IGHA1 /// IGHV4-31       | 0.683125038 | 0.002132 |

|                                                                                            |             |          |
|--------------------------------------------------------------------------------------------|-------------|----------|
| GRIN2A                                                                                     | 0.683630684 | 0.041638 |
| CCR6                                                                                       | 0.684206044 | 0.036585 |
| ZNF710                                                                                     | 0.684295627 | 0.046785 |
| PPP1R16B                                                                                   | 0.68433224  | 0.032585 |
| DNAJB9                                                                                     | 0.684884261 | 0.043191 |
| CDH11                                                                                      | 0.684993215 | 0.000872 |
| MMRN2                                                                                      | 0.685553875 | 0.049781 |
| FNIP2                                                                                      | 0.686410723 | 0.025849 |
| PXMP4                                                                                      | 0.68702146  | 0.023734 |
| FBXL17                                                                                     | 0.688726182 | 0.027569 |
| DKK3                                                                                       | 0.68911139  | 0.015667 |
| RBM41                                                                                      | 0.689514789 | 0.0278   |
| FLNA                                                                                       | 0.689746738 | 0.026674 |
| ARL15                                                                                      | 0.689790083 | 0.044712 |
| LTB                                                                                        | 0.690104174 | 0.012275 |
| CPXM2                                                                                      | 0.690238918 | 0.007897 |
| PLS3                                                                                       | 0.69045678  | 0.04514  |
| NCF4                                                                                       | 0.690500857 | 0.031321 |
| IGH /// IGHA1 /// IGHA2 /// IGHD ///<br>IGHG1 /// IGHG3 /// IGHG4 /// IGHM ///<br>IGHV4-31 | 0.69073547  | 0.004903 |
| ZNF25                                                                                      | 0.690778899 | 0.042695 |
| DKK3                                                                                       | 0.690956674 | 0.013394 |
| KLHL6                                                                                      | 0.691351277 | 0.028981 |
| BCL11B                                                                                     | 0.691436927 | 0.014633 |
| SSPN                                                                                       | 0.692200496 | 0.010746 |
| BHLHE41                                                                                    | 0.692919777 | 0.006323 |
| MOB3B                                                                                      | 0.693115859 | 0.031967 |
| GAA                                                                                        | 0.693630774 | 0.04742  |



|                |             |          |
|----------------|-------------|----------|
| LOC100505715   | 0.693748873 | 0.034001 |
| ZNF44          | 0.693844476 | 0.039208 |
| CSF2RB         | 0.694107957 | 0.007736 |
| LTBP1          | 0.69416278  | 0.029387 |
| CST4           | 0.695052203 | 0.02192  |
| ZC3H12D        | 0.695309829 | 0.020211 |
| OLFML1         | 0.695749831 | 0.049208 |
| LOXL1          | 0.696073981 | 0.045775 |
| IGHM           | 0.696837155 | 0.003592 |
| PAX5           | 0.698098622 | 0.005275 |
| WISP2          | 0.698313268 | 0.032275 |
| AHSA2          | 0.698748003 | 0.044857 |
| CPQ            | 0.699169591 | 0.040027 |
| KLHL5          | 0.699352216 | 0.015538 |
| KAT2B          | 0.699625925 | 0.049377 |
| KDSR           | 0.699664282 | 0.030075 |
| TAGAP          | 0.699857301 | 0.037064 |
| COL10A1        | 0.700022954 | 0.001172 |
| PPAPDC1B       | 0.70023711  | 0.023562 |
| RAB40B         | 0.700261731 | 0.024188 |
| MDFIC          | 0.700456168 | 0.024082 |
| GOLGA7B        | 0.701352618 | 0.032885 |
| KCNQ1          | 0.702162845 | 0.035221 |
| TACC1          | 0.702917852 | 0.011464 |
| PIK3CG         | 0.703332714 | 0.013548 |
| ITGBL1         | 0.703661193 | 0.006085 |
| IGHG1 /// IGHM | 0.703672951 | 0.026457 |
| OGT            | 0.704212805 | 0.037382 |
| UBE2QL1        | 0.704378914 | 0.009151 |

|                  |             |          |
|------------------|-------------|----------|
| CYP2U1           | 0.704813548 | 0.025178 |
| SNX20            | 0.704894955 | 0.035573 |
| ITGAL            | 0.705062213 | 0.014275 |
| ACOX2            | 0.705409234 | 0.006412 |
| KLHL6            | 0.705423001 | 0.003704 |
| COL8A2           | 0.705452587 | 0.005112 |
| ANKRD44          | 0.705832556 | 0.017763 |
| GPR18            | 0.706203317 | 0.03474  |
| C3orf70          | 0.706383536 | 0.003778 |
| SORCS2           | 0.706516427 | 0.046916 |
| LINC00537        | 0.706754688 | 0.039272 |
| SVIL             | 0.707841669 | 0.046115 |
| FSTL1            | 0.708009038 | 0.04769  |
| IKZF4            | 0.708512511 | 0.02723  |
| MKNK1            | 0.7094997   | 0.047788 |
| KCNN3            | 0.709738174 | 0.010551 |
| NUAK1            | 0.710347191 | 0.016533 |
| NLRC3            | 0.71070076  | 0.036602 |
| ST3GAL5          | 0.710999463 | 0.00381  |
| IGLV1-44         | 0.711165279 | 0.001572 |
| ITGB2-AS1        | 0.712154002 | 0.007403 |
| GPAM             | 0.71291922  | 0.039106 |
| ANKRD36          | 0.713144543 | 0.035023 |
| FBN1             | 0.713271059 | 0.025144 |
| HES1             | 0.713327432 | 0.013969 |
| FZD8 /// MIR4683 | 0.713815514 | 0.034671 |
| CDC25B           | 0.713924719 | 0.038429 |
| MIR100HG         | 0.714197283 | 0.009281 |
| EPG5             | 0.714520981 | 0.025567 |

|                                                                       |             |          |
|-----------------------------------------------------------------------|-------------|----------|
| DHTKD1                                                                | 0.714563102 | 0.034805 |
| LOC283357                                                             | 0.714683033 | 0.036271 |
| PDGFRL                                                                | 0.714851434 | 0.00865  |
| HCLS1                                                                 | 0.715456116 | 0.032335 |
| BCL2                                                                  | 0.716163344 | 0.010178 |
| BPTF                                                                  | 0.716539292 | 0.033262 |
| IGHA1 /// IGHA2 /// IGHD /// IGHG1 ///<br>IGHG3 /// IGHM /// IGHV4-31 | 0.716686697 | 0.001253 |
| ERLIN2                                                                | 0.716764114 | 0.030117 |
| DRAM1                                                                 | 0.717429219 | 0.012732 |
| SGCD                                                                  | 0.717544254 | 0.044927 |
| ETV5                                                                  | 0.717654349 | 0.045404 |
| CLIC2                                                                 | 0.718328815 | 0.004577 |
| EML4                                                                  | 0.718366866 | 0.04895  |
| PARM1                                                                 | 0.718391677 | 0.009069 |
| MR1                                                                   | 0.718682638 | 0.043356 |
| MEF2C                                                                 | 0.718855531 | 0.03952  |
| SESN3                                                                 | 0.718922112 | 0.003865 |
| SLC1A4                                                                | 0.719331868 | 0.038537 |
| BCL11B                                                                | 0.719521821 | 0.010084 |
| MOB3B                                                                 | 0.719659409 | 0.03062  |
| LINC00964                                                             | 0.720771712 | 0.038039 |
| CCDC69                                                                | 0.720819962 | 0.019255 |
| SLCO3A1                                                               | 0.722735816 | 0.033029 |
| IGH /// IGHA2 /// IGHD /// IGHG1                                      | 0.722841044 | 0.011082 |
| EPCAM                                                                 | 0.723032494 | 0.04181  |
| GLCCI1                                                                | 0.723194111 | 0.018719 |
| FGFR1                                                                 | 0.723276038 | 0.049987 |
| MZB1                                                                  | 0.724552562 | 0.000646 |

|                                       |             |          |
|---------------------------------------|-------------|----------|
| HSPA1A /// HSPA1B                     | 0.725211453 | 0.044666 |
| SLC1A7                                | 0.725412306 | 0.04401  |
| CCDC85A                               | 0.725414876 | 0.01773  |
| HIP1                                  | 0.725699995 | 0.018362 |
| LOC101929272                          | 0.72633968  | 0.002984 |
| IGK /// IGKC                          | 0.727315404 | 0.0084   |
| ID3                                   | 0.727800526 | 0.037232 |
| ENPP2                                 | 0.728087392 | 0.031944 |
| IGHA1 /// IGHG1 /// IGHM /// IGHV4-31 | 0.728674074 | 0.014929 |
| DPT                                   | 0.728801189 | 0.020735 |
| AHSA2                                 | 0.729118853 | 0.04414  |
| TRBC1                                 | 0.730153158 | 0.010872 |
| N4BP2L2                               | 0.730221511 | 0.037613 |
| PCSK5                                 | 0.730279355 | 0.040623 |
| PRDM1                                 | 0.730485907 | 0.032078 |
| TRBC1                                 | 0.730832846 | 0.017824 |
| BLNK                                  | 0.731441975 | 0.016632 |
| ANTXR1                                | 0.73212654  | 0.04077  |
| IDS                                   | 0.732290152 | 0.047545 |
| HOXB2                                 | 0.732870723 | 0.041277 |
| IGLL3P                                | 0.733034553 | 0.017997 |
| IGK /// IGKC                          | 0.733125695 | 0.011808 |
| RASSF4                                | 0.733202014 | 0.042194 |
| FCRL5                                 | 0.733463512 | 0.006022 |
| DENND5B                               | 0.733620416 | 0.048898 |
| NRP1                                  | 0.733752991 | 0.029112 |
| SLC43A3                               | 0.733885357 | 0.024791 |
| IGHA1 /// IGHG1 /// IGHG3 /// IGHM    | 0.734233025 | 0.001945 |
| GEM                                   | 0.73591768  | 0.014031 |

|                          |             |          |
|--------------------------|-------------|----------|
| RGCC                     | 0.73608302  | 0.046863 |
| FAM129A                  | 0.736347628 | 0.014534 |
| ANKHD1                   | 0.736371734 | 0.028629 |
| NCKAP1L                  | 0.737044026 | 0.031818 |
| PTP4A3                   | 0.737300737 | 0.034613 |
| CADM1                    | 0.737904423 | 0.004804 |
| RAPGEF6                  | 0.738050148 | 0.013647 |
| GUSBP11                  | 0.738317379 | 0.020668 |
| PAPLN                    | 0.739084875 | 0.035511 |
| CHRDL2                   | 0.739092362 | 0.029606 |
| TAGAP                    | 0.73939679  | 0.026448 |
| ITGBL1                   | 0.739532898 | 0.013305 |
| IGKC                     | 0.739549385 | 0.01624  |
| CYP7B1                   | 0.739659356 | 0.043916 |
| TDRP                     | 0.739751442 | 0.027495 |
| MCOLN2                   | 0.739830678 | 0.03875  |
| FAM89A /// MIR1182       | 0.741649891 | 0.03185  |
| IGHA1 /// IGHG1 /// IGHM | 0.742321724 | 0.001972 |
| LOC100293211             | 0.744066718 | 0.004428 |
| IGLV1-44                 | 0.744347146 | 0.001158 |
| PRKCB                    | 0.744547784 | 0.041541 |
| IGHG1 /// IGHM           | 0.744903432 | 0.027325 |
| MTSS1                    | 0.745231485 | 0.024821 |
| RGS8 /// SDHAP3          | 0.746302892 | 0.006709 |
| IL27RA                   | 0.746359934 | 0.011323 |
| TRAF3IP3                 | 0.747199071 | 0.029006 |
| SYNPO2                   | 0.747430674 | 0.03226  |
| CXCL12                   | 0.747571828 | 0.023463 |
| ADRB2                    | 0.747754828 | 0.019667 |

|                                                                                                                  |             |          |
|------------------------------------------------------------------------------------------------------------------|-------------|----------|
| MPHOSPH9                                                                                                         | 0.748630844 | 0.037269 |
| COL10A1                                                                                                          | 0.749532598 | 0.002308 |
| IGJ                                                                                                              | 0.750020923 | 0.002408 |
| KREMEN1                                                                                                          | 0.750420574 | 0.028269 |
| KLHL5                                                                                                            | 0.751514969 | 0.04069  |
| CR2                                                                                                              | 0.751802023 | 0.016571 |
| BHLHE41                                                                                                          | 0.752676684 | 0.047468 |
| TSIX                                                                                                             | 0.752900209 | 0.035599 |
| SLAMF7                                                                                                           | 0.753227397 | 0.011653 |
| IGLC1                                                                                                            | 0.753298984 | 0.024553 |
| GGTLC1                                                                                                           | 0.753399656 | 0.027366 |
| MIR646HG                                                                                                         | 0.753719269 | 0.020256 |
| IKZF1                                                                                                            | 0.75396796  | 0.042949 |
| PPAP2C                                                                                                           | 0.754465895 | 0.033443 |
| SIAE                                                                                                             | 0.755387765 | 0.025072 |
| COL8A1                                                                                                           | 0.755528695 | 0.034181 |
| IGK                                                                                                              | 0.755670421 | 0.001261 |
| AC128677.4 /// CH17-132F21.1 ///<br>IGKV1OR-1 /// IGKV1OR-1 ///<br>IGKV1OR10-1 /// IGKV1OR10-1 ///<br>IGKV1OR2-2 | 0.756377408 | 0.004393 |
| KCNS3                                                                                                            | 0.757601021 | 0.003385 |
| C8orf4                                                                                                           | 0.75901599  | 0.003775 |
| IGHA1 /// IGHV4-31                                                                                               | 0.759315636 | 0.002759 |
| IGHM                                                                                                             | 0.759789672 | 0.004093 |
| MZB1                                                                                                             | 0.760638816 | 0.000643 |
| BTG2                                                                                                             | 0.761871264 | 0.044477 |
| FLJ32255                                                                                                         | 0.762306352 | 0.037357 |
| CELF2                                                                                                            | 0.762634307 | 0.034757 |

|                                  |             |          |
|----------------------------------|-------------|----------|
| GAB1                             | 0.763990291 | 0.038148 |
| HLA-DPB2                         | 0.764247037 | 0.040209 |
| TNFRSF17                         | 0.764374527 | 0.00086  |
| EPHA3                            | 0.764496178 | 0.003973 |
| CELF2                            | 0.764640564 | 0.021807 |
| TRBC1                            | 0.764725246 | 0.023265 |
| DOCK8                            | 0.765227282 | 0.043745 |
| FCRL5                            | 0.766895855 | 0.001288 |
| SFRP4                            | 0.767860164 | 0.003178 |
| IGHA1                            | 0.768507494 | 0.00185  |
| LPCAT1                           | 0.768621083 | 0.038886 |
| SLAMF7                           | 0.769338549 | 0.037422 |
| TFAP2C                           | 0.76953408  | 0.041152 |
| CYSLTR1                          | 0.76974212  | 0.029594 |
| SFRP4                            | 0.771236563 | 0.004837 |
| CADM1                            | 0.77159115  | 0.007609 |
| ITGBL1                           | 0.771826151 | 0.03798  |
| IGHV3-73 /// IGHV3-73            | 0.773310649 | 0.011282 |
| TMEM43                           | 0.773316629 | 0.048109 |
| GLS                              | 0.774224768 | 0.023186 |
| ATP11A                           | 0.774279805 | 0.048481 |
| IGK /// IGKC                     | 0.775869896 | 0.004835 |
| FCRL5                            | 0.776006851 | 0.001072 |
| GNAS                             | 0.776129359 | 0.022746 |
| TNFAIP2                          | 0.777222311 | 0.048697 |
| CKAP2 /// IGLC1 /// IGLV1-40 /// | 0.777994678 | 0.001557 |
| CADM1                            | 0.778191278 | 0.010603 |
| TNFSF15                          | 0.778519576 | 0.008726 |
| C16orf54                         | 0.778771538 | 0.011285 |

|                                         |             |          |
|-----------------------------------------|-------------|----------|
| PAPPA                                   | 0.779421739 | 0.044527 |
| IGHG1 /// IGHM                          | 0.779592171 | 0.004731 |
| NAPSB                                   | 0.780077625 | 0.008259 |
| IGLL5                                   | 0.780827008 | 0.001515 |
| SPINK2                                  | 0.781340373 | 0.041663 |
| IGH /// IGHA1 /// IGHA2 /// IGHD ///    | 0.782948806 | 0.003803 |
| PRKAR2B                                 | 0.784100244 | 0.015396 |
| ANKRD36BP2                              | 0.784257777 | 0.000489 |
| FAM65B                                  | 0.784688327 | 0.045201 |
| FILIP1                                  | 0.785662621 | 0.030169 |
| SSPN                                    | 0.786840955 | 0.014076 |
| MEG3                                    | 0.787568258 | 0.042633 |
| IGH /// IGHA1 /// IGHD /// IGHG1 ///    | 0.787615778 | 0.0027   |
| IGKC                                    | 0.788543826 | 0.046314 |
| STK4                                    | 0.789855006 | 0.016113 |
| ZBTB20                                  | 0.789966813 | 0.046964 |
| FILIP1                                  | 0.790228087 | 0.021236 |
| MPP7                                    | 0.791689607 | 0.022318 |
| SOCS2                                   | 0.791719308 | 0.047365 |
| RAPGEF6                                 | 0.791727517 | 0.04827  |
| IGH /// IGHA1 /// IGHA2 /// IGHD ///    | 0.792057241 | 0.008384 |
| CKAP2 /// IGLC1 /// IGLJ2 /// IGLJ2 /// | 0.792175865 | 0.002216 |
| CD55                                    | 0.792394523 | 0.035004 |
| ZBTB20                                  | 0.792781978 | 0.032986 |
| KCNJ15                                  | 0.794713106 | 0.04925  |
| DUSP6                                   | 0.795532885 | 0.033372 |
| ESR1                                    | 0.795555462 | 0.013584 |
| LRRC15                                  | 0.796404481 | 0.01797  |
| MIR29B2 /// MIR29C                      | 0.796869169 | 0.035416 |



|                                           |             |          |
|-------------------------------------------|-------------|----------|
| ERC1                                      | 0.797312852 | 0.03738  |
| DSEL                                      | 0.799238991 | 0.016602 |
| IGHA1 /// IGHA2 /// IGHD /// IGHG1        | 0.799696749 | 0.009178 |
| LINC00086 /// LINC00087                   | 0.799735794 | 0.034459 |
| IGK /// IGKC                              | 0.800620892 | 0.006971 |
| IGLJ3                                     | 0.801958905 | 0.007117 |
| MFAP5                                     | 0.802168989 | 0.036072 |
| IGKC /// IGKV4-1 /// IGKV4-1              | 0.80296793  | 0.00042  |
| CCND1                                     | 0.804369198 | 0.026153 |
| HABP2                                     | 0.805379774 | 0.02254  |
| IGKC                                      | 0.805462519 | 0.009515 |
| PLCB1                                     | 0.805913069 | 0.020663 |
| IGKV1-37 /// IGKV1-37 /// IGKV1D-37       | 0.806059329 | 0.005861 |
| EFEMP1                                    | 0.806172793 | 0.041714 |
| TRIM2                                     | 0.806697618 | 0.031108 |
| BMS1P20                                   | 0.80722973  | 0.002788 |
| FILIP1                                    | 0.807309644 | 0.02497  |
| FMO3                                      | 0.807545762 | 0.035696 |
| IGLC1 /// IGLJ3 /// IGLV2-14 /// IGLV@    | 0.807551196 | 0.002148 |
| IGHG1 /// IGHM                            | 0.807670438 | 0.013724 |
| IGLV1-44                                  | 0.808167807 | 0.002699 |
| SESN3                                     | 0.809884218 | 0.044004 |
| CKAP2 /// IGLJ3 /// IGLV3-19 /// IGLV3-19 | 0.810641926 | 0.021423 |
| NT5E                                      | 0.811326553 | 0.04208  |
| IGLJ3                                     | 0.812238736 | 0.008856 |
| ANKRD20A1 /// ANKRD20A11P ///             | 0.812547675 | 0.046026 |
| PCSK5                                     | 0.812629867 | 0.041213 |
| BEAN1                                     | 0.813112338 | 0.030872 |

|                                                                                                         |             |          |
|---------------------------------------------------------------------------------------------------------|-------------|----------|
| IGKV1OR2-108 /// IGKV1OR2-108                                                                           | 0.814641254 | 0.011272 |
| BEX5                                                                                                    | 0.814774564 | 0.019589 |
| CKAP2 /// IGLC1 /// IGLJ2 /// IGLJ2 ///                                                                 | 0.815107074 | 0.013303 |
| CX3CL1                                                                                                  | 0.815150361 | 0.032997 |
| IGH /// IGHA1 /// IGHA2 /// IGHG1 ///                                                                   | 0.818638445 | 0.006943 |
| IGHA1 /// IGHD /// IGHG1 /// IGHG3                                                                      | 0.818872826 | 0.005724 |
| IGHA1 /// IGHG1 /// IGHM                                                                                | 0.818910154 | 0.003011 |
| PAX7                                                                                                    | 0.819063481 | 0.014151 |
| CKAP2 /// IGLC1 /// IGLV3-1 /// IGLV3-1<br>/// IGLV@                                                    | 0.819145864 | 0.01435  |
| FILIP1                                                                                                  | 0.819562422 | 0.02353  |
| SFTA2                                                                                                   | 0.821006633 | 0.004559 |
| IGH /// IGHA1 /// IGHA2 /// IGHD ///<br>IGHG1 /// IGHG3 /// IGHG4 /// IGHM ///<br>IGHV3-23 /// IGHV4-31 | 0.82260562  | 0.005109 |
| IGHM                                                                                                    | 0.822908116 | 0.008722 |
| IGLV1-44                                                                                                | 0.823107335 | 0.009427 |
| IGHG1 /// IGHG2 /// IGHM /// IGHV4-31<br>/// MIR8071-1 /// MIR8071-2                                    | 0.823576309 | 0.046178 |
| IGKC /// IGKV2-28 /// IGKV2-28 ///<br>IGKV2D-28 /// IGKV2D-28                                           | 0.826797776 | 0.006803 |
| IGHM                                                                                                    | 0.826982984 | 0.004773 |
| IGK /// IGKC                                                                                            | 0.828599653 | 0.008922 |
| IGHM                                                                                                    | 0.829090605 | 0.009557 |
| IGK /// IGKC                                                                                            | 0.829296539 | 0.006454 |
| IGHD                                                                                                    | 0.830314501 | 0.017467 |
| IGK /// IGKC                                                                                            | 0.831192884 | 0.020601 |
| IGHD                                                                                                    | 0.832248365 | 0.0144   |
| IGLJ3 /// IGLV3-19 /// IGLV3-19                                                                         | 0.832713364 | 0.014646 |

|                                 |             |          |
|---------------------------------|-------------|----------|
| HLF                             | 0.833016936 | 0.041453 |
| CCND1                           | 0.833827534 | 0.037176 |
| B2M                             | 0.834286303 | 0.045561 |
| IGK /// IGKC                    | 0.834286543 | 0.01271  |
| GPR37 /// SEL1L2                | 0.836216591 | 0.024434 |
| IGLC1 /// IGLV3-10 /// IGLV3-10 | 0.837583521 | 0.025022 |
| S100B                           | 0.837994051 | 0.049066 |
| KRT15                           | 0.838937023 | 0.035345 |
| HAGLR                           | 0.839115916 | 0.014634 |
| IGKV1-17 /// IGKV1-17           | 0.839289917 | 0.012738 |
| LOC101928620 /// POU2AF1        | 0.840020868 | 0.014287 |
| TYMP                            | 0.841422805 | 0.042815 |
| FDCSP                           | 0.84639252  | 0.036797 |
| CKAP2                           | 0.846574152 | 0.012095 |
| HOPX                            | 0.847395002 | 0.047487 |
| MS4A1                           | 0.852189268 | 0.046083 |
| IRX2                            | 0.854919989 | 0.002848 |
| HS6ST2                          | 0.85545699  | 0.042327 |
| SLC1A7                          | 0.85846512  | 0.042169 |
| HS6ST2                          | 0.860490754 | 0.04406  |
| HLA-DQB2                        | 0.863673446 | 0.03739  |
| IGHD                            | 0.877690321 | 0.009652 |
| SFTPB                           | 0.87998295  | 0.047044 |

### GSE29013

| Gene name              | HR[exp(coef)] | P-value  |
|------------------------|---------------|----------|
| MIR4691 MIR7113 NDUFS8 | 0.01892       | 0.029992 |
| TOMM40                 | 0.027         | 0.011673 |

|               |          |          |
|---------------|----------|----------|
| LMF2          | 0.027716 | 0.024275 |
| S1PR5         | 0.02809  | 0.011215 |
| ASMTL-AS1     | 0.035993 | 0.001336 |
| CYB561        | 0.046823 | 0.011238 |
| LUC7L3        | 0.046988 | 0.009014 |
| NAALADL1      | 0.048336 | 0.005834 |
| PHACTR1       | 0.051966 | 0.00738  |
| RP11-402D21.2 | 0.054314 | 0.014509 |
| TLDC1         | 0.05499  | 0.007221 |
| MID1IP1       | 0.061181 | 0.006742 |
| SRC           | 0.061685 | 0.013387 |
| ZDHHC7        | 0.063604 | 0.01172  |
| COL9A2        | 0.064587 | 0.018277 |
| FAM96B        | 0.066482 | 0.013924 |
| MTERF4        | 0.066803 | 0.003572 |
| GSTM5         | 0.067662 | 0.040767 |
| MMD2          | 0.068591 | 0.002953 |
| KIF1B         | 0.069202 | 0.036439 |
| FAM186B       | 0.069218 | 0.00627  |
| APPBP2        | 0.070958 | 0.047388 |
| ELF2          | 0.071681 | 0.029236 |
| NDOR1         | 0.072523 | 0.014031 |
| TMED5         | 0.072672 | 0.012705 |
| VIPAS39       | 0.074211 | 0.002645 |
| R3HDM2        | 0.074853 | 0.014756 |
| ZNF615        | 0.075067 | 0.003808 |
| SORL1         | 0.075558 | 0.014889 |
| RP11-649A18.7 | 0.081711 | 0.013636 |
| LOC101929177  | 0.082064 | 0.030333 |

|                          |          |          |
|--------------------------|----------|----------|
| SDHAP1 SDHAP2            | 0.08245  | 0.043178 |
| ARL3                     | 0.083041 | 0.014902 |
| SGSH                     | 0.084149 | 0.033289 |
| SOCS1                    | 0.088231 | 0.008327 |
| ELK4                     | 0.090853 | 0.019956 |
| UBE2J1                   | 0.092302 | 0.030824 |
| PHF20L1                  | 0.092362 | 0.047567 |
| POFUT1                   | 0.095852 | 0.00199  |
| SKP1                     | 0.095868 | 0.007403 |
| HABP4                    | 0.098168 | 0.003947 |
| PSMG2                    | 0.098802 | 0.008867 |
| GPR98                    | 0.099303 | 0.005055 |
| ZDHHC16                  | 0.099423 | 0.03288  |
| JAM3                     | 0.102662 | 0.03955  |
| LINC01128                | 0.103633 | 0.023299 |
| LOC284454 MIR23A MIR24-2 | 0.104846 | 0.015294 |
| SLC12A7                  | 0.107236 | 0.036036 |
| BAHD1                    | 0.108972 | 0.007589 |
| CREB3L2                  | 0.109082 | 0.034703 |
| KMT2C                    | 0.111729 | 0.022281 |
| DBT                      | 0.112256 | 0.045922 |
| HECTD2                   | 0.113701 | 0.01042  |
| DSTYK                    | 0.114236 | 0.010226 |
| POLR2C                   | 0.114915 | 0.014085 |
| KLC2                     | 0.118229 | 0.010319 |
| NCOA6                    | 0.118321 | 0.023628 |
| CEP95                    | 0.12011  | 0.027044 |
| ZXDA ZXDB                | 0.123899 | 0.033656 |
| AKIP1 NUA2               | 0.125361 | 0.005762 |

|                   |          |          |
|-------------------|----------|----------|
| PDSS2             | 0.126103 | 0.040839 |
| COQ7              | 0.126997 | 0.00104  |
| TSPAN9            | 0.127277 | 0.049726 |
| FBRSL1            | 0.12774  | 0.030957 |
| PLEC              | 0.130215 | 0.036259 |
| CAMP              | 0.130349 | 0.030369 |
| ST3GAL2           | 0.131744 | 0.007497 |
| C6orf89           | 0.131853 | 0.016346 |
| C6orf62           | 0.132111 | 0.019752 |
| SNRPA1            | 0.132151 | 0.037498 |
| SPATA2L           | 0.132629 | 0.031977 |
| SZRD1             | 0.132689 | 0.04595  |
| TBCK              | 0.132987 | 0.009768 |
| THUMPD3           | 0.134479 | 0.008198 |
| NFS1              | 0.135898 | 0.007641 |
| ATG12             | 0.136298 | 0.048212 |
| RNF146            | 0.138655 | 0.037731 |
| CCDC157           | 0.139111 | 0.003217 |
| FGFR1OP           | 0.139545 | 0.023209 |
| ALKBH7            | 0.140843 | 0.023936 |
| OVOL3             | 0.141008 | 0.024377 |
| SLC12A9           | 0.145519 | 0.043506 |
| FTSJ3             | 0.147232 | 0.034287 |
| PVRL4             | 0.149989 | 0.007088 |
| HDLBP             | 0.150997 | 0.037202 |
| NCSTN             | 0.151571 | 0.040109 |
| COX3 LOC101929612 | 0.154453 | 0.011082 |
| FAHD2CP           | 0.156493 | 0.02428  |
| RUFY3             | 0.156781 | 0.028555 |

|                    |          |          |
|--------------------|----------|----------|
| ZBED5-AS1          | 0.15689  | 0.015165 |
| PAIP1              | 0.157135 | 0.008242 |
| SRR                | 0.157876 | 0.031365 |
| FICD               | 0.159012 | 0.020888 |
| PTPRC              | 0.161216 | 0.006475 |
| INPP4A             | 0.161808 | 0.044058 |
| CUL9               | 0.16299  | 0.034089 |
| NAB2               | 0.163923 | 0.030606 |
| SIK3               | 0.166153 | 0.007245 |
| SEMA3C             | 0.167849 | 0.01223  |
| GNG7               | 0.167897 | 0.029072 |
| MIRLET7D           | 0.16813  | 0.023778 |
| EML4               | 0.16887  | 0.016367 |
| CTNND1 TMX2-CTNND1 | 0.170962 | 0.007613 |
| WIPI1              | 0.173485 | 0.029225 |
| CYFIP1             | 0.17402  | 0.019644 |
| RAPGEF2            | 0.174062 | 0.008527 |
| AQP11              | 0.174402 | 0.007174 |
| FBXO42             | 0.177513 | 0.01021  |
| GDAP1              | 0.177524 | 0.019161 |
| BC047484           | 0.177901 | 0.023388 |
| HADH               | 0.178213 | 0.046345 |
| FAM205A FAM205B    | 0.178474 | 0.006918 |
| BTBD9              | 0.178556 | 0.025101 |
| MKL1               | 0.178972 | 0.009314 |
| ACBD5              | 0.179695 | 0.044159 |
| ZFP62              | 0.179806 | 0.046814 |
| SLC25A51           | 0.180732 | 0.026793 |
| LGALS8             | 0.181358 | 0.016006 |

|                           |          |          |
|---------------------------|----------|----------|
| SSH3                      | 0.181537 | 0.023154 |
| MYL12B                    | 0.182816 | 0.025732 |
| DKFZp434L192 LOC100653233 | 0.183328 | 0.035272 |
| CYHR1                     | 0.183803 | 0.007298 |
| SOX13                     | 0.184002 | 0.011572 |
| ZSWIM4                    | 0.184324 | 0.012436 |
| GGTLC1                    | 0.184351 | 0.022316 |
| FAM228B                   | 0.185006 | 0.049215 |
| LINC00868                 | 0.186953 | 0.034974 |
| MORF4L2-AS1               | 0.187421 | 0.005306 |
| MAN1A2                    | 0.187519 | 0.023491 |
| RNF122                    | 0.191167 | 0.029898 |
| DHX32                     | 0.191749 | 0.016595 |
| HERC1                     | 0.193175 | 0.011957 |
| WAC                       | 0.194178 | 0.017275 |
| NPAS3                     | 0.19564  | 0.029744 |
| CABP1                     | 0.196535 | 0.018317 |
| DYNLL1-AS1                | 0.197019 | 0.02119  |
| CABLES1                   | 0.197933 | 0.003117 |
| KIF5B                     | 0.198116 | 0.037842 |
| CBX3                      | 0.198517 | 0.016315 |
| PPP1R12B                  | 0.200357 | 0.005155 |
| KIAA1549L                 | 0.2005   | 0.002186 |
| CTPS2                     | 0.201086 | 0.00564  |
| LOC102725454              | 0.201193 | 0.045272 |
| TBKBP1                    | 0.201472 | 0.011674 |
| LAT2                      | 0.202169 | 0.01157  |
| TCEB1P3 TCEB1P3           | 0.20277  | 0.019384 |
| USP2                      | 0.203055 | 0.014834 |



|                                                            |          |          |
|------------------------------------------------------------|----------|----------|
| ZSCAN32                                                    | 0.203254 | 0.046671 |
| IMPACT                                                     | 0.203499 | 0.034378 |
| CIT MIR1178                                                | 0.203524 | 0.005824 |
| BNIP3L                                                     | 0.203653 | 0.046359 |
| MALAT1                                                     | 0.203964 | 0.025592 |
| C11orf83                                                   | 0.205505 | 0.015748 |
| RANBP2 RGPLD1 RGPLD2 RGPLD3<br>RGPLD4 RGPLD5 RGPLD6 RGPLD8 | 0.205532 | 0.017494 |
| MDM4                                                       | 0.206434 | 0.001957 |
| ORF1                                                       | 0.206628 | 0.019389 |
| FBXW9                                                      | 0.207619 | 0.035687 |
| ATF6                                                       | 0.208653 | 0.046183 |
| NPB                                                        | 0.210349 | 0.034383 |
| EPB41L5                                                    | 0.210387 | 0.021336 |
| RANBP1                                                     | 0.211053 | 0.02766  |
| INADL                                                      | 0.214221 | 0.041107 |
| SIPA1L3                                                    | 0.214571 | 0.043604 |
| DRICH1                                                     | 0.215107 | 0.027412 |
| KLF7                                                       | 0.216525 | 0.007707 |
| COX6CP1 COX6CP1                                            | 0.217708 | 0.020985 |
| LGALS3BP                                                   | 0.218159 | 0.012297 |
| MAN2A2                                                     | 0.218258 | 0.020503 |
| AK096592 YLPM1                                             | 0.219622 | 0.0217   |
| GGT1 GGT2 GGTL1 GGTL2                                      | 0.220455 | 0.004648 |
| LINC00853                                                  | 0.220474 | 0.025396 |
| PSMD1                                                      | 0.221391 | 0.0482   |
| DEF8                                                       | 0.222489 | 0.027184 |
| HDLBP                                                      | 0.223421 | 0.027157 |
| ASH1L                                                      | 0.223687 | 0.007064 |

|                    |          |          |
|--------------------|----------|----------|
| RALB               | 0.223871 | 0.008363 |
| C14orf159          | 0.22415  | 0.011576 |
| LHX4-AS1           | 0.224238 | 0.041175 |
| BC039485 LOC284930 | 0.224859 | 0.017    |
| LOC283070          | 0.225543 | 0.003981 |
| ANK1               | 0.225938 | 0.0175   |
| EHMT1              | 0.225975 | 0.035144 |
| MARK3              | 0.22772  | 0.044232 |
| HCG18              | 0.229264 | 0.045312 |
| NECAB1             | 0.229906 | 0.020928 |
| LOC101929681       | 0.229953 | 0.008301 |
| ZNF573             | 0.232944 | 0.043057 |
| USP32 USP6         | 0.233575 | 0.02093  |
| FBXL12             | 0.233586 | 0.037563 |
| LOC100134445       | 0.235217 | 0.017868 |
| RBFOX2             | 0.235341 | 0.038561 |
| NIPAL2             | 0.235443 | 0.040352 |
| LYRM2              | 0.236123 | 0.010325 |
| JAG1               | 0.236889 | 0.041499 |
| VLDLR              | 0.237136 | 0.0081   |
| SPATA7             | 0.238163 | 0.00329  |
| SH3TC2             | 0.239304 | 0.027985 |
| MIA-RAB4B RAB4B    | 0.240357 | 0.026307 |
| SPIRE1             | 0.241043 | 0.041067 |
| RAB27A             | 0.24192  | 0.03737  |
| LOC101926967       | 0.24195  | 0.019649 |
| RASSF8-AS1         | 0.243412 | 0.04558  |
| NAAA               | 0.243779 | 0.010388 |
| TMEM222            | 0.24542  | 0.036246 |

|                    |          |          |
|--------------------|----------|----------|
| PHKB               | 0.24598  | 0.04457  |
| MEGF11             | 0.246439 | 0.042491 |
| LINC00652          | 0.246569 | 0.028877 |
| NDRG2              | 0.247238 | 0.008367 |
| PCGF2              | 0.247749 | 0.038717 |
| PSMB8-AS1          | 0.247836 | 0.005142 |
| PRAMEF1 PRAMEF2    | 0.248127 | 0.004011 |
| MSH5-SAPCD1 SAPCD1 | 0.248615 | 0.034184 |
| PYCR1              | 0.249085 | 0.017923 |
| CTA-445C9.15       | 0.24931  | 0.00284  |
| PAGR1              | 0.250563 | 0.0294   |
| HOXD9              | 0.251457 | 0.044153 |
| SPAG9              | 0.251629 | 0.015092 |
| VIPR2              | 0.251952 | 0.043798 |
| RBM26              | 0.252102 | 0.037315 |
| TRPV5              | 0.254259 | 0.013346 |
| SLC35B3            | 0.254927 | 0.030699 |
| MTA1               | 0.255028 | 0.043033 |
| ZSCAN10            | 0.255205 | 0.019152 |
| PRRC2C             | 0.255219 | 0.001415 |
| HLA-DPB1           | 0.25558  | 0.004665 |
| KCNC2              | 0.256989 | 0.019638 |
| RAB4A SPHAR        | 0.257038 | 0.042463 |
| NMRAL1             | 0.257624 | 0.007746 |
| ENAM               | 0.257658 | 0.022261 |
| CACNB1             | 0.258129 | 0.018909 |
| OR10A4             | 0.25848  | 0.049263 |
| MYL12A MYL12B      | 0.258852 | 0.018451 |
| EEF1A1             | 0.260006 | 0.035187 |

|                      |          |          |
|----------------------|----------|----------|
| TP53BP1              | 0.261087 | 0.024195 |
| MUC1                 | 0.261227 | 0.034471 |
| CCDC134              | 0.261263 | 0.03825  |
| NFIB                 | 0.261627 | 0.047441 |
| ADCY7                | 0.262245 | 0.018216 |
| AKAP1                | 0.262338 | 0.038674 |
| CTRB2                | 0.262432 | 0.016024 |
| PPP1R2               | 0.262535 | 0.005979 |
| FAM212B LOC101928718 | 0.263355 | 0.004292 |
| WDR78                | 0.263582 | 0.037017 |
| KDM1A                | 0.264539 | 0.022454 |
| CALCOCO2             | 0.264689 | 0.01149  |
| ENDOV                | 0.265243 | 0.020266 |
| TCF7L2               | 0.265247 | 0.009009 |
| ARL5A LOC101929356   | 0.266406 | 0.016017 |
| RBP1                 | 0.266931 | 0.045741 |
| SUSD2                | 0.267738 | 0.035355 |
| KLK15                | 0.267879 | 0.021522 |
| RP11-272D12.1        | 0.268479 | 0.041051 |
| SWAP70               | 0.269726 | 0.025637 |
| UBTD2                | 0.269957 | 0.012781 |
| TCF3                 | 0.270158 | 0.035454 |
| LMBRD1               | 0.270169 | 0.026217 |
| TMTC1                | 0.270216 | 0.009051 |
| NPR2                 | 0.270316 | 0.026034 |
| NFATC3               | 0.270497 | 0.023    |
| YTHDC2               | 0.270794 | 0.028457 |
| HID1                 | 0.272184 | 0.030072 |
| ARSD                 | 0.272787 | 0.043956 |

|              |          |          |
|--------------|----------|----------|
| PRODH2       | 0.273444 | 0.008048 |
| MAVS         | 0.275375 | 0.043168 |
| AQR          | 0.275401 | 0.039943 |
| MALAT1       | 0.275564 | 0.010581 |
| CYP39A1      | 0.275617 | 0.004626 |
| C6orf48      | 0.276343 | 0.034482 |
| PPP4R1       | 0.277406 | 0.029284 |
| LOC284798    | 0.278862 | 0.014835 |
| ZNF785       | 0.278979 | 0.010128 |
| PRSS23       | 0.279664 | 0.026544 |
| HMBS         | 0.279762 | 0.021672 |
| ZBTB43       | 0.280759 | 0.023161 |
| ZC3H3        | 0.28187  | 0.027189 |
| SUPT7L       | 0.282196 | 0.037807 |
| LOC101927051 | 0.285317 | 0.046751 |
| MCM3AP       | 0.285684 | 0.037543 |
| SLC35C2      | 0.285711 | 0.004842 |
| BAIAP2       | 0.286379 | 0.0246   |
| COX20        | 0.286858 | 0.002496 |
| LINC01118    | 0.28753  | 0.018086 |
| MAN1A2       | 0.288831 | 0.001436 |
| NLRP8        | 0.290203 | 0.010203 |
| FOXN3        | 0.290516 | 0.002802 |
| LOC646484    | 0.291072 | 0.006528 |
| ATXN10       | 0.291222 | 0.044549 |
| PPP2R5E      | 0.291629 | 0.016848 |
| EPB41L4A     | 0.29166  | 0.008973 |
| STXBP2       | 0.291733 | 0.002438 |
| SOCS7        | 0.292047 | 0.033778 |

|                           |          |          |
|---------------------------|----------|----------|
| HPSE2                     | 0.292048 | 0.014748 |
| TMEM64                    | 0.292833 | 0.021635 |
| MLH3                      | 0.293104 | 0.02269  |
| EIF1                      | 0.293226 | 0.023276 |
| LOC101929963 LOC101930299 | 0.293297 | 0.023449 |
| GADD45B                   | 0.293525 | 0.014457 |
| CEP41                     | 0.294058 | 0.004999 |
| UNK                       | 0.29507  | 0.040612 |
| MAP1LC3A                  | 0.295832 | 0.008359 |
| KIAA0408                  | 0.295838 | 0.038052 |
| SLC43A2                   | 0.296349 | 0.008087 |
| KIF2C                     | 0.296386 | 0.035352 |
| PAWR                      | 0.297898 | 0.043798 |
| TLDC1                     | 0.298884 | 0.028947 |
| FNBP1                     | 0.299122 | 0.030082 |
| LINC00708                 | 0.300014 | 0.024064 |
| LOC101927292              | 0.300907 | 0.008365 |
| FXVD6                     | 0.301174 | 0.003922 |
| ATP2A2                    | 0.301416 | 0.001622 |
| LOC101929668              | 0.303071 | 0.032271 |
| ADAD1                     | 0.304035 | 0.024384 |
| PHF20                     | 0.304965 | 0.007288 |
| LINC00184                 | 0.305127 | 0.029948 |
| PNKD                      | 0.305253 | 0.044349 |
| TTY5                      | 0.305651 | 0.002448 |
| LOC101060424              | 0.306539 | 0.042066 |
| EPHA4                     | 0.307409 | 0.032836 |
| CDC42BPA                  | 0.308658 | 0.047045 |
| RP3-334F4.1               | 0.309062 | 0.041183 |

|                    |          |          |
|--------------------|----------|----------|
| COPS6              | 0.309086 | 0.004428 |
| TPP1               | 0.309453 | 0.049696 |
| CAMSAP1            | 0.309521 | 0.008814 |
| LOC100996404       | 0.309895 | 0.027047 |
| NDUFAF3            | 0.310265 | 0.005061 |
| PARD3B             | 0.310941 | 0.035869 |
| DENND1B            | 0.311334 | 0.020285 |
| PPP1R11            | 0.311358 | 0.014672 |
| DENND5B            | 0.31177  | 0.04305  |
| LOC101928061 SERP1 | 0.312102 | 0.033975 |
| TRO                | 0.312471 | 0.009479 |
| PTP4A1             | 0.312598 | 0.039161 |
| WNT6               | 0.312657 | 0.025471 |
| RUFY2              | 0.312828 | 0.019967 |
| SPPL2B             | 0.313116 | 0.003955 |
| PDE3B              | 0.315279 | 0.04808  |
| DNASE1             | 0.315914 | 0.010154 |
| SLC17A1            | 0.316203 | 0.005227 |
| RP11-50E11.3       | 0.316715 | 0.015343 |
| SYDE1              | 0.317102 | 0.018235 |
| UBN2               | 0.317339 | 0.027259 |
| MYL4               | 0.317765 | 0.001321 |
| LEPREL1            | 0.317834 | 0.039349 |
| ZMYND8             | 0.317897 | 0.048117 |
| ASCC2              | 0.31834  | 0.047218 |
| SLC6A19            | 0.319055 | 0.018343 |
| NUP214             | 0.319293 | 0.018469 |
| DCAF10             | 0.319395 | 0.024962 |
| NOL12 TRIOBP       | 0.319456 | 0.007165 |

|                                                |          |          |
|------------------------------------------------|----------|----------|
| LOC100507006                                   | 0.320641 | 0.012019 |
| PUM1                                           | 0.322124 | 0.033237 |
| IGHG1 IGHM LOC102725426<br>MIR8071-1 MIR8071-2 | 0.322682 | 0.019677 |
| CLCN7                                          | 0.323979 | 0.039079 |
| FBXL3                                          | 0.324753 | 0.007174 |
| SOX10                                          | 0.32511  | 0.008513 |
| TRMT61B                                        | 0.325293 | 0.036226 |
| GLYAT                                          | 0.325794 | 0.008446 |
| SIGLEC8                                        | 0.325812 | 0.007514 |
| OCIAD1                                         | 0.325943 | 0.009179 |
| VWF                                            | 0.327046 | 0.037064 |
| LMF1                                           | 0.327897 | 0.01957  |
| JKAMP                                          | 0.328248 | 0.025342 |
| LAMA3                                          | 0.328556 | 0.041843 |
| MTHFSD                                         | 0.328705 | 0.029731 |
| DNAJB9                                         | 0.328715 | 0.039655 |
| FAM224A FAM224B                                | 0.328905 | 0.03162  |
| IL5RA                                          | 0.329131 | 0.019247 |
| ATP5G2                                         | 0.329198 | 0.049382 |
| ABCD1                                          | 0.329844 | 0.020712 |
| HS6ST3                                         | 0.330201 | 0.006678 |
| PINK1                                          | 0.330724 | 0.009523 |
| SMG6                                           | 0.330907 | 0.031882 |
| BPIFB2                                         | 0.332091 | 0.012015 |
| ITPR2                                          | 0.332145 | 0.009437 |
| GAREM                                          | 0.33219  | 0.045338 |
| SEMA3D                                         | 0.332587 | 0.019473 |
| EIF5B                                          | 0.332933 | 0.022976 |



|                 |          |          |
|-----------------|----------|----------|
| ZMYM6           | 0.333376 | 0.034486 |
| TACR2           | 0.333558 | 0.009925 |
| ITGA2B          | 0.333975 | 0.020737 |
| THSD4           | 0.334028 | 0.032506 |
| LINC01181       | 0.335007 | 0.013601 |
| SUGP2           | 0.335613 | 0.018874 |
| MERTK           | 0.336693 | 0.013665 |
| A4GNT           | 0.336704 | 0.001227 |
| ZFAND6          | 0.337834 | 0.039349 |
| DDX31           | 0.337972 | 0.044651 |
| KIAA1644        | 0.337978 | 0.037066 |
| NADSYN1         | 0.338012 | 0.002554 |
| LOC340085       | 0.338255 | 0.043171 |
| NBPF20          | 0.339033 | 0.018653 |
| RP11-757F18.5   | 0.339551 | 0.022874 |
| AQP6            | 0.339775 | 0.04894  |
| CLN8            | 0.340189 | 0.026586 |
| RP11-95D17.1    | 0.34113  | 0.014568 |
| CPNE6           | 0.341268 | 0.032635 |
| WBSCR22         | 0.341411 | 0.034502 |
| EXD3            | 0.341699 | 0.012088 |
| PPIAP21 PPIAP21 | 0.342132 | 0.019122 |
| CKAP5           | 0.34222  | 0.024738 |
| ODF3            | 0.34262  | 0.017336 |
| ARF3            | 0.343284 | 0.041486 |
| SRC             | 0.343311 | 0.041407 |
| NEDD9           | 0.343409 | 0.023239 |
| LRRC37A3        | 0.343464 | 0.025463 |
| PTN             | 0.344026 | 0.039546 |

|                     |          |          |
|---------------------|----------|----------|
| TMEM185B            | 0.344532 | 0.028967 |
| ZNF677              | 0.344909 | 0.006352 |
| CALM1 CALM2 CALM3   | 0.345002 | 0.010508 |
| IPP                 | 0.345057 | 0.004626 |
| COX4I1              | 0.346268 | 0.046289 |
| TRPM6               | 0.346607 | 0.049536 |
| AC011997.1 BC021693 | 0.346923 | 0.009661 |
| CYP2W1              | 0.347985 | 0.010877 |
| HAS1                | 0.349067 | 0.015912 |
| TNXA TNXB           | 0.349169 | 0.020503 |
| LRP2                | 0.349779 | 0.029411 |
| PSEN2               | 0.350098 | 0.021376 |
| PTGES               | 0.351138 | 0.025938 |
| KLHDC10             | 0.351365 | 0.031328 |
| ZSCAN30             | 0.35143  | 0.029191 |
| GANC                | 0.351545 | 0.002855 |
| PDYN                | 0.352405 | 0.013414 |
| NGEF                | 0.352926 | 0.013605 |
| ARID1A              | 0.35307  | 0.006041 |
| PCID2               | 0.354327 | 0.005215 |
| KANK1               | 0.354484 | 0.049971 |
| RGS17               | 0.35455  | 0.010096 |
| LINC00629           | 0.354579 | 0.025135 |
| RALGAPB             | 0.354743 | 0.039113 |
| SYT17               | 0.35477  | 0.032528 |
| TRIM11              | 0.354896 | 0.015569 |
| APC                 | 0.354974 | 0.042332 |
| RP11-196G18.24      | 0.355506 | 0.03341  |
| BET1                | 0.355726 | 0.048071 |

|                      |          |          |
|----------------------|----------|----------|
| HPS1                 | 0.355995 | 0.021598 |
| CD99L2               | 0.356057 | 0.015042 |
| AP3S2 C15orf38-AP3S2 | 0.356465 | 0.041403 |
| CABLES1              | 0.356755 | 0.02048  |
| GAS6-AS1             | 0.358846 | 0.008747 |
| CRELD1               | 0.358956 | 0.006515 |
| PI4K2A               | 0.359289 | 0.041296 |
| FBN3                 | 0.359551 | 0.008701 |
| GEM                  | 0.359624 | 0.031322 |
| ELP2                 | 0.360572 | 0.049179 |
| TRAK1                | 0.360706 | 0.029989 |
| TBC1D24              | 0.361807 | 0.001041 |
| AAED1                | 0.36211  | 0.008059 |
| EHMT1-IT1            | 0.363132 | 0.030262 |
| RFX1                 | 0.363351 | 0.035009 |
| GGCX                 | 0.363424 | 0.04404  |
| STXBP5-AS1           | 0.363524 | 0.008869 |
| PDS5B                | 0.36447  | 0.013525 |
| MICAL3               | 0.364912 | 0.02773  |
| ANGPT1               | 0.365104 | 0.015722 |
| ACAA1                | 0.365371 | 0.021216 |
| GOLGA7B              | 0.365382 | 0.045979 |
| TYMSOS               | 0.365412 | 0.049708 |
| SDHC                 | 0.366528 | 0.009562 |
| WNT9A                | 0.366616 | 0.015827 |
| PLA2G16              | 0.366753 | 0.031101 |
| SLC44A2              | 0.366899 | 0.035218 |
| TMED4                | 0.367061 | 0.005898 |
| TNXA TNXB            | 0.367995 | 0.013656 |

|                        |          |          |
|------------------------|----------|----------|
| CHD4                   | 0.368616 | 0.040434 |
| HIPK3                  | 0.369347 | 0.001567 |
| DNAJC27-AS1            | 0.369502 | 0.03675  |
| ZNF682                 | 0.369713 | 0.04793  |
| GSX2                   | 0.370408 | 0.025925 |
| AAK1                   | 0.370422 | 0.017878 |
| KCNJ3                  | 0.370586 | 0.01412  |
| CYB5A                  | 0.370914 | 0.0395   |
| LOC101929232 PDCD6IPP2 | 0.371352 | 0.014291 |
| CDC42BPA               | 0.371652 | 0.008491 |
| LOC101927060           | 0.372185 | 0.048493 |
| XAGE2                  | 0.372703 | 0.014077 |
| RP1-140C12.2           | 0.372837 | 0.016947 |
| INADL                  | 0.373358 | 0.036676 |
| PP2672                 | 0.375    | 0.033387 |
| SPATA6                 | 0.375587 | 0.02724  |
| DNAJC27                | 0.375603 | 0.027305 |
| UG0898H09              | 0.375628 | 0.037917 |
| YAE1D1                 | 0.376459 | 0.020591 |
| MIR1204 PVT1           | 0.376659 | 0.02483  |
| LINC00664              | 0.377623 | 0.005121 |
| SERPINE2               | 0.377831 | 0.033855 |
| LINC00965              | 0.378206 | 0.021304 |
| NUP188                 | 0.378473 | 0.010651 |
| NRG2                   | 0.378528 | 0.019717 |
| FLJ33360               | 0.379294 | 0.008498 |
| KEL                    | 0.379319 | 0.021333 |
| CPA3                   | 0.380016 | 0.009274 |
| USP36                  | 0.380368 | 0.025374 |

|               |          |          |
|---------------|----------|----------|
| MYOG          | 0.380781 | 0.027501 |
| ANKS6         | 0.380787 | 0.01619  |
| TMC8          | 0.381709 | 0.040787 |
| FAM187B       | 0.381906 | 0.00946  |
| LOC100509814  | 0.382545 | 0.012606 |
| FOLH1 FOLH1B  | 0.382554 | 0.002336 |
| ERCC6         | 0.382689 | 0.041187 |
| ACAD10        | 0.382711 | 0.004694 |
| ACOT12        | 0.383698 | 0.003994 |
| MYOM1         | 0.383776 | 0.005971 |
| GPR39         | 0.383812 | 0.016595 |
| ARHGEF9       | 0.3839   | 0.008771 |
| B9D1          | 0.384162 | 0.015263 |
| PPP1R3F       | 0.384282 | 0.003411 |
| CCDC176       | 0.384388 | 0.021086 |
| PSPC1         | 0.384578 | 0.032386 |
| SLC35F3       | 0.384861 | 0.00414  |
| MGAT4A        | 0.384901 | 0.038118 |
| AKT2          | 0.385041 | 0.024308 |
| NFASC         | 0.385322 | 0.034985 |
| AR            | 0.385375 | 0.009107 |
| FAM118A       | 0.385412 | 0.030713 |
| TAP2          | 0.38544  | 0.037341 |
| CEP89         | 0.385892 | 0.014339 |
| RP11-410L14.2 | 0.385907 | 0.007906 |
| ADI1          | 0.386323 | 0.00286  |
| PGRMC2        | 0.386458 | 0.04548  |
| SEC24B        | 0.386648 | 0.029768 |
| C5orf22       | 0.387089 | 0.002504 |

|                                |          |          |
|--------------------------------|----------|----------|
| INTS3                          | 0.387604 | 0.023314 |
| LINC01016                      | 0.388052 | 0.015785 |
| DENND6B                        | 0.388117 | 0.024331 |
| FKBP14                         | 0.38848  | 0.003835 |
| ATP6V1E2 FLJ41757              | 0.388936 | 0.012158 |
| IZUMO4                         | 0.389016 | 0.026928 |
| LRFN4                          | 0.389128 | 0.049615 |
| PHKG2                          | 0.389461 | 0.031714 |
| HNMT                           | 0.389658 | 0.034336 |
| POMC                           | 0.389836 | 0.018594 |
| FZD1                           | 0.390387 | 0.018787 |
| RP11-102C16.3                  | 0.390746 | 0.045974 |
| ACVRL1                         | 0.390956 | 0.046017 |
| POP4                           | 0.391011 | 0.006009 |
| B3GALNT2                       | 0.39119  | 0.028339 |
| FAM134C                        | 0.391243 | 0.036823 |
| AEBP1                          | 0.391277 | 0.014048 |
| SOWAHC                         | 0.391301 | 0.004604 |
| DBT                            | 0.39165  | 0.023903 |
| CCPG1 DYX1C1-CCPG1             | 0.391997 | 0.005023 |
| ERICH1-AS1                     | 0.392188 | 0.014946 |
| FGF14                          | 0.392574 | 0.004865 |
| WASIR1 WASIR1 WASIR2<br>WASIR2 | 0.392751 | 0.013152 |
| LOC101928418                   | 0.39287  | 0.016444 |
| RP11-209D14.2                  | 0.393039 | 0.03934  |
| WBP1L                          | 0.393044 | 0.017105 |
| DKK2                           | 0.393081 | 0.047258 |
| CAPN1                          | 0.393167 | 0.014957 |

|                 |          |          |
|-----------------|----------|----------|
| POM121          | 0.39409  | 0.018117 |
| KCNN1           | 0.394939 | 0.042877 |
| SMIM7           | 0.394951 | 0.007208 |
| MYLK4           | 0.395328 | 0.010106 |
| RHOXF1          | 0.395421 | 0.004925 |
| PDPN            | 0.396054 | 0.014515 |
| FLJ45513 TAC4   | 0.396558 | 0.037258 |
| PRPF40A         | 0.396641 | 0.014241 |
| HIC2            | 0.39724  | 0.021817 |
| RNASE1          | 0.39735  | 0.013336 |
| ARHGAP29        | 0.397589 | 0.035223 |
| CD58            | 0.397726 | 0.01971  |
| ALG5            | 0.398058 | 0.002947 |
| FLI1            | 0.398117 | 0.04444  |
| C1orf115        | 0.398569 | 0.009734 |
| SLC9A1          | 0.398586 | 0.003498 |
| MCFD2           | 0.399047 | 0.006338 |
| GCGR            | 0.399103 | 0.014038 |
| SPDEF           | 0.399261 | 0.017178 |
| NR2F6           | 0.399375 | 0.02857  |
| LOC150776 SMPD4 | 0.399936 | 0.016046 |
| DMRTB1          | 0.40025  | 0.027514 |
| TADA1           | 0.400357 | 0.037214 |
| CRYGC           | 0.400381 | 0.004426 |
| RBMS2           | 0.400384 | 0.011751 |
| SMUG1           | 0.400426 | 0.049222 |
| GPR125          | 0.400462 | 0.005209 |
| FGFR4           | 0.400713 | 0.027972 |
| PTGER3          | 0.401232 | 0.030706 |

|              |          |          |
|--------------|----------|----------|
| FLJ45825     | 0.401594 | 0.036111 |
| SLC25A35     | 0.401696 | 0.037954 |
| ENPP5        | 0.402013 | 0.020205 |
| DNAJA4       | 0.402439 | 0.016763 |
| DHRS7C       | 0.402558 | 0.028878 |
| GPR182       | 0.402622 | 0.018966 |
| NRXN3        | 0.402656 | 0.02874  |
| SH2D4A       | 0.403343 | 0.04548  |
| MMRN2        | 0.403603 | 0.00958  |
| UMPS         | 0.403712 | 0.032032 |
| STAM2        | 0.404219 | 0.011763 |
| MYOM3        | 0.404258 | 0.01773  |
| POLR2F       | 0.40434  | 0.023182 |
| BBS4         | 0.404504 | 0.047525 |
| SERPINF2     | 0.404952 | 0.033153 |
| CXCL5        | 0.405277 | 0.02804  |
| TRMT5        | 0.405588 | 0.023265 |
| ARRB1        | 0.405784 | 0.035728 |
| SPOCK3       | 0.40615  | 0.0062   |
| PPP1R3D      | 0.406414 | 0.011693 |
| C17orf100    | 0.40676  | 0.042501 |
| RANBP3       | 0.407094 | 0.010419 |
| CERS4        | 0.407336 | 0.037785 |
| GATAD2A      | 0.407427 | 0.042093 |
| FTCDNL1      | 0.408464 | 0.015241 |
| TAS2R7       | 0.408464 | 0.019143 |
| LOC100130502 | 0.408831 | 0.019888 |
| CPNE7        | 0.409701 | 0.004672 |
| LOC646762    | 0.409841 | 0.011631 |



|                      |          |          |
|----------------------|----------|----------|
| LOC283045            | 0.409855 | 0.009426 |
| FLNA                 | 0.410551 | 0.018326 |
| KALRN                | 0.41091  | 0.02663  |
| CALML5               | 0.410963 | 0.037845 |
| WDR74                | 0.411036 | 0.04819  |
| TBCD                 | 0.411349 | 0.041448 |
| RWDD2A               | 0.411439 | 0.015954 |
| DYM                  | 0.412376 | 0.023533 |
| LOC100505774         | 0.41242  | 0.049446 |
| HPGDS                | 0.412741 | 0.00694  |
| PARVB                | 0.412911 | 0.00263  |
| ANKRD36B             | 0.41296  | 0.048174 |
| ABCB9                | 0.414235 | 0.025234 |
| HTR7                 | 0.414942 | 0.014659 |
| SSTR2                | 0.415424 | 0.020327 |
| LINC00167            | 0.415562 | 0.010578 |
| ENSA                 | 0.416165 | 0.027713 |
| BPTF                 | 0.41674  | 0.041039 |
| KCNE4                | 0.416998 | 0.006455 |
| FAM212B LOC101928718 | 0.417653 | 0.036591 |
| ANXA2P1              | 0.417801 | 0.040204 |
| EIF5A2               | 0.418045 | 0.026466 |
| FGF1                 | 0.41838  | 0.022661 |
| PCED1A               | 0.418827 | 0.011946 |
| NPY6R                | 0.419381 | 0.019586 |
| PIGA                 | 0.419642 | 0.035048 |
| C2orf73              | 0.419777 | 0.04583  |
| KCNJ5                | 0.419836 | 0.025257 |
| ADAM18               | 0.419945 | 0.006438 |

|                 |          |          |
|-----------------|----------|----------|
| SH3BGRL2        | 0.420502 | 0.028513 |
| WFDC9           | 0.420567 | 0.034257 |
| TOPORS-AS1      | 0.420593 | 0.030413 |
| TMF1            | 0.420768 | 0.034369 |
| ATP2B2          | 0.421332 | 0.041346 |
| KCNJ16          | 0.422012 | 0.016133 |
| LRRC27          | 0.422112 | 0.00643  |
| ECE2            | 0.422156 | 0.029173 |
| CSF2            | 0.423159 | 0.028657 |
| SHROOM4         | 0.423888 | 0.037198 |
| PDE7B           | 0.424095 | 0.038811 |
| KIR3DL1 KIR3DL2 | 0.424218 | 0.044283 |
| CR1             | 0.424658 | 0.014436 |
| ABCC3           | 0.425561 | 0.026436 |
| KIF5A           | 0.42616  | 0.011624 |
| KCNH6           | 0.42716  | 0.030656 |
| INPP5F          | 0.427584 | 0.021233 |
| NR2F2           | 0.427776 | 0.041494 |
| TMEM80          | 0.42835  | 0.034661 |
| ITIH5           | 0.428432 | 0.023873 |
| CCDC3           | 0.428728 | 0.006493 |
| KIAA1683        | 0.429178 | 0.046029 |
| CETN1           | 0.429298 | 0.027716 |
| LOC100507283    | 0.429618 | 0.035949 |
| VWA3A           | 0.429779 | 0.032742 |
| IBA57           | 0.430122 | 0.009599 |
| GAS6            | 0.430198 | 0.008216 |
| FBP1            | 0.430804 | 0.041027 |
| MALAT1          | 0.431069 | 0.026056 |

|                        |          |          |
|------------------------|----------|----------|
| SPINT1                 | 0.431352 | 0.037045 |
| PRUNE                  | 0.431654 | 0.01555  |
| INO80D                 | 0.431704 | 0.0141   |
| AL110181 RP11-390E23.6 | 0.43189  | 0.028497 |
| DHX16                  | 0.43224  | 0.034724 |
| DPF3                   | 0.432271 | 0.032223 |
| IFT57                  | 0.43228  | 0.036973 |
| BNIP1 C1orf56          | 0.432307 | 0.004227 |
| LOC100288721           | 0.43244  | 0.044559 |
| RP11-349E4.1           | 0.432544 | 0.048186 |
| TMUB2                  | 0.432703 | 0.049872 |
| RAPGEF2                | 0.432757 | 0.008543 |
| ING3                   | 0.433478 | 0.043148 |
| PSMD10                 | 0.433531 | 0.040153 |
| NFAM1                  | 0.434003 | 0.01425  |
| LOC102724611           | 0.434689 | 0.012001 |
| BRD4                   | 0.434847 | 0.049163 |
| DCAF8                  | 0.434859 | 0.017417 |
| LINC01225              | 0.434866 | 0.035411 |
| NPC1                   | 0.435323 | 0.008602 |
| ZNF750                 | 0.435965 | 0.017382 |
| CYP2B6                 | 0.436154 | 0.025212 |
| AC010145.4             | 0.436344 | 0.045975 |
| NOVA2                  | 0.436464 | 0.046076 |
| LOC100133669           | 0.437506 | 0.02707  |
| TUBGCP4                | 0.437765 | 0.020479 |
| IGHG1                  | 0.438983 | 0.047188 |
| AMER1                  | 0.439097 | 0.018574 |
| MYOZ2                  | 0.439374 | 0.008829 |

|                                             |          |          |
|---------------------------------------------|----------|----------|
| RP11-77H9.8                                 | 0.439545 | 0.032204 |
| RAD54L2                                     | 0.439646 | 0.020374 |
| MYH11                                       | 0.439924 | 0.018408 |
| MGC40069 TRAC TRAJ17<br>TRAV20 TRDV2 YME1L1 | 0.440088 | 0.033116 |
| PYROXD2                                     | 0.440365 | 0.013396 |
| TTC17                                       | 0.440501 | 0.028407 |
| GINS2                                       | 0.440767 | 0.049965 |
| ATP4B                                       | 0.440872 | 0.027506 |
| SELPLG                                      | 0.44092  | 0.026114 |
| TTC30B                                      | 0.441014 | 0.0133   |
| BAIAP2                                      | 0.441022 | 0.016923 |
| NUP210                                      | 0.441354 | 0.013036 |
| CTSA                                        | 0.441912 | 0.017801 |
| HFE                                         | 0.442039 | 0.015972 |
| RTN3                                        | 0.442202 | 0.022028 |
| IDS                                         | 0.442753 | 0.015247 |
| CAMK2D                                      | 0.444105 | 0.021552 |
| ST8SIA3                                     | 0.444823 | 0.006175 |
| LOC100287098                                | 0.445492 | 0.047021 |
| TUBGCP3                                     | 0.445806 | 0.011627 |
| TPI1                                        | 0.445885 | 0.045735 |
| EML1                                        | 0.446054 | 0.049691 |
| RBM5                                        | 0.446151 | 0.043579 |
| ST3GAL5                                     | 0.446616 | 0.046886 |
| GOLT1A                                      | 0.447123 | 0.022844 |
| FAM13B                                      | 0.447202 | 0.010824 |
| TOLLIP                                      | 0.447331 | 0.032267 |
| TET3                                        | 0.447397 | 0.031943 |

|                  |          |          |
|------------------|----------|----------|
| ASPH             | 0.447432 | 0.013237 |
| MEX3D            | 0.447509 | 0.011706 |
| MLLT10           | 0.448309 | 0.014642 |
| MIP              | 0.448784 | 0.039361 |
| TBC1D7           | 0.449154 | 0.024962 |
| ANAPC1 LOC730268 | 0.449503 | 0.014115 |
| CEP350           | 0.449825 | 0.0065   |
| AMBN             | 0.449924 | 0.040233 |
| PRPF3            | 0.450983 | 0.032336 |
| LINC00471        | 0.45102  | 0.045263 |
| MAPK1            | 0.451186 | 0.018761 |
| PALM3            | 0.45129  | 0.018591 |
| ABCA8            | 0.451397 | 0.015889 |
| CLCN6            | 0.451765 | 0.006388 |
| PPP2R5B          | 0.452019 | 0.010799 |
| SLC25A2          | 0.452121 | 0.032587 |
| PGLYRP4          | 0.452187 | 0.043031 |
| NLRX1            | 0.452248 | 0.041345 |
| ANKRD24          | 0.452392 | 0.011685 |
| ZNF10            | 0.452945 | 0.02222  |
| SCARA3           | 0.452993 | 0.045522 |
| LOC101927038     | 0.453627 | 0.031948 |
| POMT2            | 0.453903 | 0.006439 |
| CCDC136          | 0.454012 | 0.007344 |
| GLT8D2           | 0.454163 | 0.041148 |
| BHLHE22          | 0.454617 | 0.034786 |
| SPTY2D1-AS1      | 0.454968 | 0.008123 |
| PARD6B           | 0.455491 | 0.038958 |
| EXTL1            | 0.456035 | 0.026733 |

|                       |          |          |
|-----------------------|----------|----------|
| IGKC                  | 0.456456 | 0.038418 |
| C16orf58              | 0.456717 | 0.014105 |
| MYO1H                 | 0.45786  | 0.042417 |
| LINC00636             | 0.458428 | 0.047993 |
| TMEM237               | 0.458823 | 0.034232 |
| LOC100506530          | 0.458898 | 0.020841 |
| SPNS1                 | 0.458966 | 0.040245 |
| STX10                 | 0.459182 | 0.048907 |
| SLC1A7                | 0.459229 | 0.00987  |
| MYF5                  | 0.459563 | 0.029875 |
| ARHGAP12              | 0.459697 | 0.006678 |
| KCNQ1OT1 LOC101927338 | 0.45999  | 0.02541  |
| MIR6741 PYCR2         | 0.460021 | 0.024941 |
| BC037214 RP11-58G13.1 | 0.460143 | 0.004448 |
| FBN1                  | 0.460773 | 0.044854 |
| OR2A20P OR2A9P        | 0.46078  | 0.038895 |
| ZNF224                | 0.461121 | 0.026056 |
| CTD-2520I13.1         | 0.461222 | 0.014944 |
| NKD2                  | 0.461617 | 0.032805 |
| LOC441528             | 0.462504 | 0.022181 |
| FGFR1                 | 0.462581 | 0.038205 |
| CTD-3193O13.1         | 0.462615 | 0.020439 |
| LOC101928475          | 0.462643 | 0.015541 |
| F11R                  | 0.463135 | 0.006775 |
| HIF3A                 | 0.463234 | 0.016811 |
| GRM7 LOC100996542     | 0.46332  | 0.032064 |
| KCNB2                 | 0.463329 | 0.024727 |
| ITPR1-AS1             | 0.463481 | 0.005722 |
| LDLRAD4               | 0.463982 | 0.013117 |

|                   |          |          |
|-------------------|----------|----------|
| GFOD2             | 0.464211 | 0.016342 |
| LOC157273         | 0.464583 | 0.032144 |
| ATAT1             | 0.46467  | 0.028932 |
| VPS72             | 0.465125 | 0.036613 |
| RPS15A            | 0.466058 | 0.02984  |
| THAP9             | 0.466138 | 0.042118 |
| HSPA5             | 0.466747 | 0.048619 |
| RP11-109E10.1     | 0.467073 | 0.015811 |
| AP2A2             | 0.467304 | 0.032608 |
| AAAS              | 0.467415 | 0.045339 |
| LOC101929777 WNT3 | 0.467517 | 0.018007 |
| IRAK1BP1          | 0.467539 | 0.017057 |
| TACC2             | 0.46759  | 0.031982 |
| ABO               | 0.467709 | 0.029119 |
| KAL1              | 0.467718 | 0.022998 |
| XRCC1             | 0.467724 | 0.010513 |
| LINC00092         | 0.467981 | 0.041041 |
| ZBTB5             | 0.468144 | 0.025323 |
| PARP14            | 0.468205 | 0.015705 |
| FLVCR2            | 0.468764 | 0.017595 |
| C3orf35           | 0.468926 | 0.047977 |
| CARHSP1           | 0.469217 | 0.034433 |
| ACPP              | 0.469516 | 0.022295 |
| MPPE1             | 0.469927 | 0.017565 |
| LZTS2             | 0.470137 | 0.022605 |
| UBXN1             | 0.470243 | 0.030865 |
| OR14J1            | 0.470352 | 0.011882 |
| OR8D1             | 0.470495 | 0.019421 |
| BCAP29            | 0.471418 | 0.017231 |

|                                       |          |          |
|---------------------------------------|----------|----------|
| VAPB                                  | 0.471865 | 0.047443 |
| PHACTR2                               | 0.471877 | 0.023272 |
| HYAL3                                 | 0.472129 | 0.021496 |
| ATXN2L                                | 0.472176 | 0.030319 |
| ZNF24                                 | 0.472225 | 0.046943 |
| PPP3CB                                | 0.472317 | 0.034815 |
| CASP9                                 | 0.472518 | 0.021793 |
| HRH4                                  | 0.472987 | 0.018022 |
| CCSER1                                | 0.473281 | 0.03638  |
| MAP6                                  | 0.473353 | 0.022743 |
| RP5-892K4.1                           | 0.473417 | 0.004536 |
| ZNF592                                | 0.473767 | 0.027042 |
| WDFY2                                 | 0.474197 | 0.014507 |
| LOC100130111                          | 0.474223 | 0.010653 |
| CNIH3                                 | 0.474696 | 0.012177 |
| FOXP1                                 | 0.475066 | 0.017795 |
| ZNF644                                | 0.475249 | 0.004584 |
| SAR1A                                 | 0.476051 | 0.033545 |
| ZBTB14                                | 0.47611  | 0.047707 |
| PRR20A PRR20B PRR20C<br>PRR20D PRR20E | 0.476158 | 0.028332 |
| AC012499.1                            | 0.476315 | 0.021408 |
| NAGS                                  | 0.476471 | 0.005132 |
| LINC00960                             | 0.476481 | 0.010959 |
| RP1-190J20.2                          | 0.476624 | 0.04868  |
| HSFY1 HSFY2                           | 0.476788 | 0.046501 |
| EOGT                                  | 0.476942 | 0.049611 |
| EFHC1                                 | 0.47702  | 0.014477 |
| GAGE1                                 | 0.477289 | 0.033599 |



|                                                                                                     |          |          |
|-----------------------------------------------------------------------------------------------------|----------|----------|
| NUCKS1                                                                                              | 0.477923 | 0.031457 |
| LOC101929591                                                                                        | 0.478133 | 0.026361 |
| PI16                                                                                                | 0.478327 | 0.031071 |
| AV8S2A1N1T hADV36S1 TCR-alpha<br>TCR-alpha TCRA TRAC TRAJ20<br>TRAJ20 TRAV36DV7 TRAV36DV7<br>YME1L1 | 0.478518 | 0.013732 |
| EFHC1                                                                                               | 0.478562 | 0.010992 |
| PSMG4                                                                                               | 0.478611 | 0.041798 |
| TBC1D22B                                                                                            | 0.47866  | 0.035956 |
| FSCN1                                                                                               | 0.47921  | 0.014475 |
| HGD                                                                                                 | 0.479696 | 0.022686 |
| CCDC120                                                                                             | 0.479706 | 0.015112 |
| CCT8                                                                                                | 0.481484 | 0.018994 |
| VDAC1                                                                                               | 0.481633 | 0.013886 |
| SV2A                                                                                                | 0.481808 | 0.035666 |
| UPF1                                                                                                | 0.482075 | 0.040436 |
| IQCA1                                                                                               | 0.482651 | 0.027137 |
| PMM1                                                                                                | 0.483075 | 0.0049   |
| ZNF155                                                                                              | 0.48329  | 0.027682 |
| DHX36                                                                                               | 0.483604 | 0.025494 |
| ARSA                                                                                                | 0.48399  | 0.032741 |
| ANK1                                                                                                | 0.484155 | 0.04273  |
| MATN1-AS1                                                                                           | 0.484726 | 0.009564 |
| ARPC4 ARPC4-TTLL3 TTLL3                                                                             | 0.485121 | 0.041715 |
| LOC100505609                                                                                        | 0.485488 | 0.005252 |
| TLR7                                                                                                | 0.486038 | 0.027549 |
| GJB1                                                                                                | 0.486058 | 0.034704 |
| SIX5                                                                                                | 0.486222 | 0.026022 |

|               |          |          |
|---------------|----------|----------|
| ZNF827        | 0.486541 | 0.04812  |
| DPP6          | 0.486553 | 0.044749 |
| GOSR1         | 0.486714 | 0.005798 |
| RNFT2         | 0.486936 | 0.035641 |
| DYNC1H1       | 0.487283 | 0.041627 |
| PRO2214       | 0.4877   | 0.015435 |
| GRIN2A        | 0.488128 | 0.043842 |
| LOC283682     | 0.488211 | 0.005659 |
| GLIPR2        | 0.488741 | 0.026943 |
| RP11-663N22.1 | 0.488812 | 0.027761 |
| LOC253573     | 0.488989 | 0.021858 |
| LINC00112     | 0.489483 | 0.010332 |
| PTGER3        | 0.489691 | 0.032375 |
| PSG4          | 0.489892 | 0.020368 |
| AFF4          | 0.490483 | 0.022613 |
| OSBPL10       | 0.49068  | 0.044901 |
| SLC5A5        | 0.490894 | 0.025204 |
| IL4R          | 0.491074 | 0.035416 |
| C1orf95       | 0.491256 | 0.006896 |
| WDR61         | 0.491303 | 0.031926 |
| RP11-131L23.2 | 0.491354 | 0.040673 |
| SCAMPER       | 0.491453 | 0.044974 |
| MRPS14        | 0.491566 | 0.032566 |
| NAA30         | 0.491737 | 0.015341 |
| KCNMB1        | 0.492021 | 0.038149 |
| ADCK1         | 0.492416 | 0.027609 |
| ZNF77         | 0.492734 | 0.028086 |
| TRIP11        | 0.49299  | 0.041433 |
| VAPB          | 0.493003 | 0.020689 |

|                       |          |          |
|-----------------------|----------|----------|
| RP4-647C14.3          | 0.493116 | 0.032751 |
| TIRAP                 | 0.493122 | 0.021586 |
| STK38                 | 0.493129 | 0.040077 |
| LOC100506325          | 0.493316 | 0.028194 |
| ZNF816 ZNF816-ZNF321P | 0.493569 | 0.014764 |
| LDLRAD4-AS1           | 0.493718 | 0.008571 |
| SH3BP5-AS1            | 0.494371 | 0.005999 |
| OSTM1                 | 0.494523 | 0.019555 |
| C6orf226              | 0.494661 | 0.047546 |
| HCRT                  | 0.494737 | 0.031715 |
| TATDN1                | 0.495667 | 0.048003 |
| RP11-1260E13.2        | 0.495967 | 0.024551 |
| ITSN1                 | 0.496449 | 0.034472 |
| RFWD2                 | 0.496707 | 0.006066 |
| TSPAN16               | 0.496781 | 0.023845 |
| TNFRSF19              | 0.497528 | 0.033796 |
| NUDCD3                | 0.497586 | 0.031583 |
| CLEC4GP1              | 0.497738 | 0.021991 |
| GIMAP1                | 0.497802 | 0.022618 |
| PARD3                 | 0.498324 | 0.042277 |
| ACSS1                 | 0.498473 | 0.008828 |
| TMEM223               | 0.498484 | 0.028847 |
| RPS28                 | 0.499664 | 0.037065 |
| LOC255177             | 0.499787 | 0.04615  |
| ENDOV                 | 0.499978 | 0.029293 |
| OSBPL10               | 0.500198 | 0.015345 |
| ACE                   | 0.50023  | 0.041651 |
| GOLGB1                | 0.500637 | 0.022084 |
| TRUB1                 | 0.500772 | 0.046048 |

|                                |          |          |
|--------------------------------|----------|----------|
| COBLL1                         | 0.500784 | 0.039492 |
| KIF22                          | 0.501124 | 0.01809  |
| LOC101929172                   | 0.50119  | 0.049094 |
| ARID4A                         | 0.501311 | 0.024858 |
| RBBP6                          | 0.501432 | 0.034556 |
| ONECUT1                        | 0.501635 | 0.04232  |
| KIAA1919                       | 0.501854 | 0.033773 |
| TANC1                          | 0.502456 | 0.008413 |
| PCDHB4                         | 0.502822 | 0.004381 |
| EMB                            | 0.503263 | 0.017071 |
| LOC728690                      | 0.504213 | 0.044683 |
| PTCRA                          | 0.504218 | 0.040122 |
| ZFP69                          | 0.50452  | 0.023736 |
| C1orf68                        | 0.504817 | 0.043495 |
| POU3F3                         | 0.50523  | 0.023162 |
| TRIM8                          | 0.505309 | 0.03131  |
| DAP                            | 0.506164 | 0.046828 |
| ART4                           | 0.506166 | 0.005632 |
| CD1B                           | 0.50624  | 0.044926 |
| AC010980.2 LOC440934 LOC440934 | 0.506264 | 0.023358 |
| LRCH2                          | 0.50644  | 0.021982 |
| NUFIP1                         | 0.507128 | 0.03198  |
| FOXN3                          | 0.507205 | 0.026506 |
| SPINT1                         | 0.507388 | 0.011957 |
| DNMT3A                         | 0.507422 | 0.048165 |
| CLIP4                          | 0.507497 | 0.034734 |
| IFT140                         | 0.507543 | 0.021511 |
| ZNF3                           | 0.507854 | 0.048396 |
| MAVS                           | 0.508023 | 0.015523 |

|                     |          |          |
|---------------------|----------|----------|
| RBPM5               | 0.508253 | 0.01595  |
| PTPDC1              | 0.508254 | 0.034698 |
| CBLC                | 0.508308 | 0.031001 |
| GSAP                | 0.508497 | 0.022986 |
| LRRFIP1             | 0.508601 | 0.028679 |
| SLC22A15            | 0.508833 | 0.013784 |
| ZNF626              | 0.509197 | 0.038127 |
| TAB3                | 0.509283 | 0.015881 |
| ABCD2               | 0.509317 | 0.049484 |
| LILRA1              | 0.50985  | 0.011273 |
| ARRDC1              | 0.510369 | 0.049953 |
| LRRC37A7P LRRC37A7P | 0.510465 | 0.034023 |
| SCN1B               | 0.510704 | 0.033104 |
| MAP4K4              | 0.511538 | 0.023944 |
| LOC101930324 NSF    | 0.511621 | 0.020593 |
| UBE2D4              | 0.512057 | 0.034347 |
| CPLX3               | 0.512136 | 0.049801 |
| RP11-333O1.1        | 0.512462 | 0.012016 |
| SLC22A7             | 0.512472 | 0.02417  |
| TMED4               | 0.512684 | 0.036675 |
| KRBA2               | 0.512855 | 0.025183 |
| DOK5                | 0.513334 | 0.045839 |
| NUB1                | 0.513458 | 0.041329 |
| CHRD                | 0.513515 | 0.041194 |
| NAG18               | 0.513534 | 0.027864 |
| CASC3 MIR6866       | 0.513613 | 0.028225 |
| FAM219B             | 0.51396  | 0.047273 |
| REG4                | 0.514347 | 0.044147 |
| CCDC7               | 0.514384 | 0.032432 |

|                                     |          |          |
|-------------------------------------|----------|----------|
| LINC00242                           | 0.514592 | 0.026606 |
| CCNG1                               | 0.515559 | 0.019214 |
| RP11-425D10.10                      | 0.515582 | 0.019167 |
| RAB17                               | 0.515768 | 0.048833 |
| PGM5                                | 0.516276 | 0.030563 |
| TRPC6                               | 0.516431 | 0.039257 |
| ONECUT3                             | 0.517752 | 0.032163 |
| SETMAR                              | 0.517755 | 0.011034 |
| FFAR1                               | 0.517898 | 0.020682 |
| LARP4B                              | 0.517916 | 0.031809 |
| STIM1                               | 0.51797  | 0.040344 |
| MEGF9                               | 0.518269 | 0.032794 |
| EMILIN2                             | 0.518713 | 0.014658 |
| TTN                                 | 0.518838 | 0.016925 |
| STXBP2                              | 0.519009 | 0.022579 |
| LINC00921 ZNF263                    | 0.51911  | 0.027521 |
| H2AFJ                               | 0.519325 | 0.010469 |
| SPATA6L                             | 0.519796 | 0.040571 |
| DOCK11                              | 0.519895 | 0.013372 |
| EPS8L3                              | 0.519918 | 0.036591 |
| DPY19L2P4                           | 0.520382 | 0.020169 |
| GPR157                              | 0.520519 | 0.023005 |
| RPAIN                               | 0.520621 | 0.036718 |
| DPF2                                | 0.520629 | 0.013176 |
| MACROD2                             | 0.521952 | 0.025978 |
| NUP153 RP11-500C11.3                | 0.523304 | 0.041251 |
| AP1AR                               | 0.523637 | 0.024367 |
| C17orf49 RNASEK RNASEK-<br>C17orf49 | 0.524017 | 0.030376 |

|                         |          |          |
|-------------------------|----------|----------|
| SF1                     | 0.52418  | 0.042017 |
| TMEM87B                 | 0.524272 | 0.026454 |
| CACNA1G                 | 0.525245 | 0.038133 |
| PURG                    | 0.525808 | 0.019921 |
| IGH IGHA2 IGHD IGHG1    | 0.525837 | 0.030826 |
| TXLNGY                  | 0.526175 | 0.011927 |
| DCT                     | 0.526249 | 0.02505  |
| MUC5AC                  | 0.526541 | 0.007102 |
| FBLIM1                  | 0.527024 | 0.030217 |
| BNIP2                   | 0.527045 | 0.025664 |
| BOLA2 LOC101060386 SMG1 | 0.527057 | 0.017075 |
| LOC100127886            | 0.527211 | 0.013586 |
| PPM1L                   | 0.527546 | 0.043293 |
| ARAF                    | 0.527759 | 0.01207  |
| UBE3A                   | 0.527914 | 0.019139 |
| CAPS                    | 0.528081 | 0.031797 |
| ANXA2P3                 | 0.528144 | 0.044728 |
| LMO3                    | 0.528334 | 0.015583 |
| SOX6                    | 0.528502 | 0.008918 |
| CCR10                   | 0.529029 | 0.042932 |
| ZFP91                   | 0.529052 | 0.036771 |
| LINC00884               | 0.529275 | 0.046277 |
| AC008753.4              | 0.529417 | 0.047472 |
| OR52A1                  | 0.529797 | 0.037895 |
| C9orf37                 | 0.530158 | 0.04592  |
| LOC101930150 NF1        | 0.530227 | 0.021583 |
| LOC221272               | 0.53038  | 0.02846  |
| MALAT1                  | 0.531269 | 0.048512 |
| TAPT1                   | 0.531383 | 0.030102 |

|                                    |          |          |
|------------------------------------|----------|----------|
| PVRL1                              | 0.531459 | 0.041367 |
| BGLAP PMF1 PMF1-BGLAP              | 0.532346 | 0.040049 |
| GGA2                               | 0.532664 | 0.018141 |
| DYNC2LI1                           | 0.532953 | 0.035427 |
| GREM2                              | 0.532954 | 0.017991 |
| GLS                                | 0.53322  | 0.03567  |
| LOC728705 TMEM263                  | 0.533554 | 0.025693 |
| SHANK2                             | 0.533656 | 0.029542 |
| CYP19A1                            | 0.533748 | 0.027361 |
| LOC100507616                       | 0.534282 | 0.026279 |
| LOC286359                          | 0.534649 | 0.012183 |
| LINC01133                          | 0.534923 | 0.023307 |
| IL27                               | 0.535125 | 0.034537 |
| FEZ1                               | 0.53521  | 0.021852 |
| CRH                                | 0.535302 | 0.042133 |
| CGNL1 LOC101930344<br>LOC101930349 | 0.535532 | 0.036994 |
| CAND1.11                           | 0.535678 | 0.044724 |
| INTS9                              | 0.53628  | 0.042135 |
| GLDN                               | 0.536513 | 0.0126   |
| ZNF3                               | 0.537561 | 0.037829 |
| GTF2H5                             | 0.537596 | 0.035521 |
| MMRN2                              | 0.537919 | 0.029039 |
| ZFP90                              | 0.538052 | 0.047828 |
| RP11-108K3.2                       | 0.538079 | 0.045948 |
| MLXIP                              | 0.53816  | 0.035588 |
| VWA3B                              | 0.538719 | 0.013522 |
| RP11-548M13.1                      | 0.539427 | 0.042433 |
| SPATA31A1                          | 0.539632 | 0.0353   |



|                       |          |          |
|-----------------------|----------|----------|
| DBP                   | 0.539677 | 0.046318 |
| ACSL6                 | 0.539782 | 0.023983 |
| COL6A5                | 0.540015 | 0.042727 |
| GRAMD3                | 0.540023 | 0.022467 |
| EBF2                  | 0.54037  | 0.006456 |
| SPEM1                 | 0.540825 | 0.021974 |
| NFKB1                 | 0.54211  | 0.038851 |
| BC042811 RP11-340I6.8 | 0.542405 | 0.035361 |
| WDR37                 | 0.542965 | 0.014094 |
| XIAP                  | 0.543094 | 0.038111 |
| AGK                   | 0.543236 | 0.039533 |
| PRTG                  | 0.543856 | 0.022528 |
| VPS37C                | 0.543954 | 0.045105 |
| NPRL2                 | 0.544134 | 0.032001 |
| RP11-140I16.3         | 0.544394 | 0.009646 |
| DICER1                | 0.544559 | 0.016293 |
| ELAC1                 | 0.544715 | 0.031015 |
| AHCYL2                | 0.544805 | 0.032809 |
| C6orf52               | 0.544995 | 0.031872 |
| LOC101927377          | 0.54518  | 0.041053 |
| NDST3                 | 0.545362 | 0.024365 |
| GAS5                  | 0.545494 | 0.008028 |
| DUOX1                 | 0.545834 | 0.029715 |
| UTP11L                | 0.54623  | 0.036024 |
| RABGAP1L              | 0.546249 | 0.035721 |
| LOC145945             | 0.546329 | 0.03549  |
| LOC100129112          | 0.546599 | 0.041341 |
| HCG18                 | 0.546644 | 0.009024 |
| KIAA0391              | 0.546795 | 0.038663 |

|                 |          |          |
|-----------------|----------|----------|
| RP9             | 0.546808 | 0.024162 |
| LIN7A           | 0.54701  | 0.048262 |
| LOC100287590    | 0.547347 | 0.03904  |
| DAB2            | 0.547385 | 0.022461 |
| TIPRL           | 0.547782 | 0.029855 |
| NKX2-1          | 0.547982 | 0.014504 |
| FUT8            | 0.54838  | 0.047311 |
| LOC101928666    | 0.548499 | 0.04717  |
| CYP4F30P        | 0.548578 | 0.031993 |
| C1QTNF1         | 0.549093 | 0.018485 |
| MAPK8IP3        | 0.549122 | 0.044412 |
| CD300LG         | 0.549235 | 0.038673 |
| UBXN2B          | 0.54931  | 0.015367 |
| LOC101929497    | 0.54932  | 0.043533 |
| CCDC144A        | 0.549342 | 0.045093 |
| ENTHD2          | 0.549522 | 0.01738  |
| GALT            | 0.550014 | 0.028436 |
| HSPB8           | 0.550033 | 0.016331 |
| CWH43           | 0.550093 | 0.009379 |
| AMPH            | 0.550113 | 0.022581 |
| ANKFN1 BC037494 | 0.550366 | 0.022822 |
| FAM86B1         | 0.550482 | 0.033386 |
| VSTM2A          | 0.55076  | 0.028704 |
| SULT1E1         | 0.550986 | 0.032536 |
| METAP1D         | 0.551184 | 0.016581 |
| KCNK10          | 0.551494 | 0.011118 |
| ITPR2           | 0.551844 | 0.040199 |
| KIAA0513        | 0.552334 | 0.046723 |
| FGF18           | 0.552431 | 0.033972 |

|                       |          |          |
|-----------------------|----------|----------|
| LFNG                  | 0.552484 | 0.027386 |
| B4GALNT2              | 0.553618 | 0.023929 |
| HBP1                  | 0.554181 | 0.01389  |
| AC106801.1            | 0.554222 | 0.029265 |
| FAM182B FAM27B FAM27C | 0.554342 | 0.021892 |
| LAPTM4B               | 0.554576 | 0.046242 |
| LIG3                  | 0.554807 | 0.020991 |
| EPB41L4A-AS1          | 0.554946 | 0.016463 |
| LOC100507654          | 0.554952 | 0.03829  |
| SSX2 SSX2B            | 0.555201 | 0.038568 |
| HFM1                  | 0.555282 | 0.012631 |
| RSU1                  | 0.555295 | 0.01706  |
| SLC22A1               | 0.556051 | 0.037792 |
| KIAA1715              | 0.556252 | 0.022715 |
| ZNF618                | 0.556277 | 0.012528 |
| LAPTM4B               | 0.556298 | 0.028536 |
| DNAJB6 TMEM135        | 0.556546 | 0.029871 |
| UTS2B                 | 0.556648 | 0.022622 |
| ENTHD1                | 0.556722 | 0.023304 |
| TRIM2                 | 0.557518 | 0.022438 |
| POLR3C                | 0.557609 | 0.037326 |
| TCEB3                 | 0.55771  | 0.01887  |
| DCAF4L2               | 0.557798 | 0.047262 |
| HNF1B                 | 0.557902 | 0.042564 |
| THEM5                 | 0.558008 | 0.041335 |
| HIST1H4A HIST1H4B     | 0.558045 | 0.049972 |
| WDFY3-AS2             | 0.558867 | 0.037964 |
| NAE1                  | 0.559145 | 0.025945 |
| ERBB4                 | 0.560392 | 0.041273 |

|                    |          |          |
|--------------------|----------|----------|
| ZDHHC2             | 0.560934 | 0.02227  |
| MTUS1              | 0.561327 | 0.025018 |
| PRO2964            | 0.561474 | 0.021489 |
| HECW2              | 0.561814 | 0.020616 |
| TRAV40 TRAV40      | 0.561833 | 0.046596 |
| PCBD2              | 0.561862 | 0.023057 |
| TAT                | 0.563063 | 0.03156  |
| BTRC               | 0.563338 | 0.034099 |
| SNX19              | 0.564032 | 0.046106 |
| DIEXF              | 0.564834 | 0.016949 |
| BAALC              | 0.564885 | 0.04594  |
| VSX1               | 0.565649 | 0.02038  |
| KIF6               | 0.566284 | 0.046002 |
| NR1H3              | 0.566715 | 0.01965  |
| CTBP1-AS           | 0.566748 | 0.043525 |
| SLC35G2            | 0.566978 | 0.025235 |
| LOC101928631 ZNF77 | 0.567469 | 0.027982 |
| FRYL               | 0.567514 | 0.01628  |
| LDHAL6CP LDHAL6CP  | 0.567834 | 0.0179   |
| SLC35E2 SLC35E2B   | 0.567908 | 0.037797 |
| LOC101928955       | 0.567912 | 0.023783 |
| HNMT               | 0.568017 | 0.016165 |
| MBD4               | 0.568252 | 0.032765 |
| LSG1               | 0.56841  | 0.029333 |
| PRKAG2             | 0.568785 | 0.028649 |
| CCDC122            | 0.56888  | 0.016718 |
| GABBR2             | 0.569286 | 0.018071 |
| GDPD3              | 0.569355 | 0.040965 |
| WDR35              | 0.57033  | 0.049953 |

|                        |          |          |
|------------------------|----------|----------|
| QRICH2                 | 0.570604 | 0.03435  |
| FNIP1                  | 0.571182 | 0.012789 |
| NFATC4                 | 0.572047 | 0.041934 |
| CPNE1                  | 0.572453 | 0.005947 |
| OR2A4                  | 0.572715 | 0.03163  |
| OR12D3 OR5V1           | 0.573443 | 0.01376  |
| RNASEH2C               | 0.574658 | 0.029314 |
| HP HPR                 | 0.575332 | 0.0444   |
| SYNPR-AS1              | 0.575399 | 0.027962 |
| BC024027 RP11-268G12.1 | 0.576689 | 0.044025 |
| RP11-339A11.2          | 0.577049 | 0.032837 |
| GPR89A GPR89B          | 0.577315 | 0.022579 |
| SLC27A6                | 0.577953 | 0.049163 |
| LOC101928419           | 0.577975 | 0.046561 |
| ZCWPW2                 | 0.578098 | 0.025489 |
| ADAMTS18               | 0.578213 | 0.040985 |
| MARS MIR6758           | 0.578612 | 0.038561 |
| IGSF1                  | 0.579226 | 0.022739 |
| CADM1                  | 0.579333 | 0.037478 |
| ZNF672                 | 0.579466 | 0.042552 |
| BAGE                   | 0.57971  | 0.047457 |
| PPP1R1A                | 0.579849 | 0.010577 |
| COG6                   | 0.580598 | 0.03717  |
| PHPT1                  | 0.580919 | 0.037433 |
| RP11-214K3.20          | 0.582168 | 0.035675 |
| SLC16A6                | 0.582938 | 0.046593 |
| PGD                    | 0.583026 | 0.03714  |
| GGNBP2                 | 0.583073 | 0.046083 |
| FNDC1                  | 0.583782 | 0.031706 |

|                 |          |          |
|-----------------|----------|----------|
| AJAP1           | 0.584227 | 0.043927 |
| TFB1M           | 0.584581 | 0.021071 |
| ZFPM2           | 0.584747 | 0.04553  |
| ZNF365          | 0.584878 | 0.038986 |
| LOC90784 POLR1A | 0.585066 | 0.041799 |
| SLC16A9         | 0.58509  | 0.048278 |
| MAGIX           | 0.585119 | 0.038128 |
| XCR1            | 0.58551  | 0.02138  |
| NFKB2           | 0.5857   | 0.020647 |
| GP2             | 0.585717 | 0.022113 |
| RALGPS1         | 0.585911 | 0.042938 |
| ZC3H10          | 0.586146 | 0.042171 |
| MCFD2P1 MCFD2P1 | 0.586429 | 0.044299 |
| C11orf54        | 0.586736 | 0.049644 |
| MAP9            | 0.586797 | 0.024172 |
| GLS             | 0.587302 | 0.022122 |
| LOC101930657    | 0.587757 | 0.02749  |
| ARID2           | 0.587765 | 0.006046 |
| LPCAT1          | 0.588513 | 0.026692 |
| C21orf59        | 0.588513 | 0.04243  |
| RREB1           | 0.588983 | 0.037593 |
| MYCLP1 MYCLP1   | 0.589583 | 0.039366 |
| CEP89           | 0.590847 | 0.047926 |
| SCN1A           | 0.59133  | 0.045672 |
| ARSE            | 0.591868 | 0.027585 |
| TTC7A           | 0.591937 | 0.0453   |
| LOC102659288    | 0.592539 | 0.014231 |
| IMPA2           | 0.593641 | 0.015545 |
| HIP1            | 0.593769 | 0.040849 |

|               |          |          |
|---------------|----------|----------|
| VASH1         | 0.594605 | 0.036221 |
| PLEKHA6       | 0.595299 | 0.037495 |
| CFL2          | 0.595743 | 0.038605 |
| SMARCA2       | 0.596315 | 0.034243 |
| DNAH1         | 0.596594 | 0.047703 |
| KIRREL3-AS3   | 0.597018 | 0.049214 |
| XKR6          | 0.598493 | 0.032422 |
| MMRN1         | 0.599161 | 0.034295 |
| CECR2         | 0.599365 | 0.046798 |
| FRAS1         | 0.599818 | 0.049973 |
| PACRG-AS1     | 0.600745 | 0.03571  |
| TFEC          | 0.601219 | 0.042693 |
| PTGFR         | 0.601963 | 0.04046  |
| STYX          | 0.602102 | 0.024587 |
| LOC100506314  | 0.602889 | 0.029553 |
| VWDE          | 0.603803 | 0.040164 |
| SEL1L         | 0.604992 | 0.035742 |
| XPO5          | 0.605571 | 0.042603 |
| LINC01351     | 0.605715 | 0.038122 |
| CHCHD3        | 0.605753 | 0.036983 |
| TSR1          | 0.605885 | 0.044091 |
| RP11-690I21.2 | 0.605995 | 0.043041 |
| ZAN           | 0.606818 | 0.040947 |
| NINJ2         | 0.607029 | 0.046213 |
| LACC1         | 0.608331 | 0.043251 |
| COL4A5        | 0.608906 | 0.044442 |
| ZDHHC14       | 0.609022 | 0.043338 |
| HOTAIR        | 0.609463 | 0.021132 |
| LIMCH1        | 0.6099   | 0.04282  |

|                           |          |          |
|---------------------------|----------|----------|
| SYNE1                     | 0.610974 | 0.046528 |
| KALP KALP                 | 0.611657 | 0.040131 |
| ZBTB6                     | 0.612478 | 0.010184 |
| ATP5C1                    | 0.613601 | 0.03115  |
| SLX4IP                    | 0.613856 | 0.038655 |
| LINC01120                 | 0.614109 | 0.025294 |
| CTD-2196E14.6             | 0.614876 | 0.04148  |
| PAX8                      | 0.616641 | 0.033427 |
| XXyac-YX155B6.7           | 0.617155 | 0.048489 |
| ITSN1                     | 0.617771 | 0.027419 |
| LOC100127940              | 0.617887 | 0.036967 |
| NSUN7                     | 0.617974 | 0.048314 |
| LOC100506076 LOC100506123 | 0.619171 | 0.043784 |
| BIN1                      | 0.619346 | 0.042956 |
| AP2A1                     | 0.620523 | 0.035955 |
| IRX2                      | 0.620726 | 0.036907 |
| GRIA3                     | 0.621377 | 0.030663 |
| CHURC1-FNTB FNTB          | 0.622824 | 0.033298 |
| ELP2                      | 0.624198 | 0.040113 |
| ZDHHC21                   | 0.625064 | 0.035063 |
| OTUD5                     | 0.625302 | 0.036967 |
| RABL3                     | 0.625455 | 0.047954 |
| TMEM161B                  | 0.626241 | 0.039741 |
| BACH1 GRIK1-AS2 LINC00189 | 0.629113 | 0.042993 |
| URGCP                     | 0.629323 | 0.041815 |
| ATP2A2                    | 0.630127 | 0.040598 |
| FGF13                     | 0.630396 | 0.031571 |
| GPR137                    | 0.630765 | 0.035595 |
| NAPG                      | 0.630871 | 0.036734 |



|                |          |          |
|----------------|----------|----------|
| TMPRSS6        | 0.632456 | 0.046611 |
| CEP76          | 0.6331   | 0.031838 |
| RHOT1          | 0.633286 | 0.026581 |
| MST1L          | 0.635588 | 0.048187 |
| GPR180         | 0.636261 | 0.030886 |
| ZC3HAV1        | 0.636693 | 0.042815 |
| SNAI3-AS1      | 0.639394 | 0.032384 |
| MIR663AHG      | 0.642734 | 0.049459 |
| CIT MIR1178    | 0.64484  | 0.039071 |
| ODF3L1         | 0.644961 | 0.03525  |
| TMEM52B        | 0.6451   | 0.040024 |
| HSPA9          | 0.645276 | 0.036841 |
| NDST2          | 0.646416 | 0.049484 |
| MKLN1          | 0.64697  | 0.038096 |
| LINC01105      | 0.647765 | 0.045974 |
| ZNF746         | 0.650963 | 0.043547 |
| KRT74          | 0.651849 | 0.046653 |
| CLDN23         | 0.652553 | 0.044693 |
| PHC3           | 0.654016 | 0.045533 |
| BC036055 PREX2 | 0.658984 | 0.024389 |
| C7orf57        | 0.663136 | 0.039099 |
| ZBED4          | 0.664    | 0.044585 |
| ARHGEF26-AS1   | 0.668547 | 0.04927  |
| ZC2HC1A        | 0.670518 | 0.016916 |
| ARID4A         | 0.676971 | 0.046752 |
| FNIP1          | 0.684907 | 0.033698 |
| CYP2C8         | 0.692794 | 0.045904 |
| LYRM2          | 0.731303 | 0.049718 |
| SLC35A5        | 0.735022 | 0.037532 |

HR, hazard ratio.
